# Supplementary material for: Tetraose steroidal glycoalkaloids from potato provide resistance against Alternaria solani and Colorado potato beetle
Source: eLife. 2023 Sep 26;12:RP87135. doi: 10.7554/eLife.87135 (PMC10522338; doi:10.7554/eLife.87135)
Supplement: Figure 1—source data 1. [file elife-87135-fig1-data1.xlsx]

## Sheet: Figure 1-source data 1
Genotype	Plant replicate	Leaf position	Lesion size (mm)
CGN17988_1	1	Upper	2.46
CGN17988_1	1	Upper	2.95
CGN17988_1	1	Upper	3.73
CGN17988_1	1	Upper	3.53
CGN17988_1	1	Middle	4.73
CGN17988_1	1	Middle	3.28
CGN17988_1	1	Middle	4.16
CGN17988_1	1	Middle	4.51
CGN17988_1	1	Lower	3.85
CGN17988_1	1	Lower	3.81
CGN17988_1	1	Lower	4.73
CGN17988_1	1	Lower	4.88
CGN17988_1	2	Upper	0
CGN17988_1	2	Upper	0.03
CGN17988_1	2	Upper	0.03
CGN17988_1	2	Upper	2.81
CGN17988_1	2	Middle	2.82
CGN17988_1	2	Middle	4.08
CGN17988_1	2	Middle	1.82
CGN17988_1	2	Middle	0
CGN17988_1	2	Lower	3.92
CGN17988_1	2	Lower	3.39
CGN17988_1	2	Lower	3.61
CGN17988_1	2	Lower	3.61
CGN17988_1	3	Upper	2.21
CGN17988_1	3	Upper	1.54
CGN17988_1	3	Upper	0.64
CGN17988_1	3	Upper	2.8
CGN17988_1	3	Middle	3.86
CGN17988_1	3	Middle	3.74
CGN17988_1	3	Middle	3.87
CGN17988_1	3	Middle	7.27
CGN17988_1	3	Lower	3.36
CGN17988_1	3	Lower	2.68
CGN17988_1	3	Lower	3.06
CGN17988_1	3	Lower	3.06
CGN17988_2	1	Upper	0.64
CGN17988_2	1	Upper	0.65
CGN17988_2	1	Upper	1.68
CGN17988_2	1	Upper	1.68
CGN17988_2	1	Middle	1.73
CGN17988_2	1	Middle	0
CGN17988_2	1	Middle	0
CGN17988_2	1	Middle	0
CGN17988_2	1	Lower	1.95
CGN17988_2	1	Lower	3
CGN17988_2	1	Lower	1.57
CGN17988_2	1	Lower	2.51
CGN17988_2	2	Upper	1.74
CGN17988_2	2	Upper	2.05
CGN17988_2	2	Upper	0.72
CGN17988_2	2	Upper	0.72
CGN17988_2	2	Middle	2.16
CGN17988_2	2	Middle	2.97
CGN17988_2	2	Middle	3.31
CGN17988_2	2	Middle	0.93
CGN17988_2	2	Lower	1.69
CGN17988_2	2	Lower	2.08
CGN17988_2	2	Lower	1.86
CGN17988_2	2	Lower	2.47
CGN17988_2	3	Upper	2.72
CGN17988_2	3	Upper	1.59
CGN17988_2	3	Upper	1.6
CGN17988_2	3	Upper	1.6
CGN17988_2	3	Middle	0
CGN17988_2	3	Middle	0.01
CGN17988_2	3	Middle	0.01
CGN17988_2	3	Middle	0.01
CGN17988_2	3	Lower	0
CGN17988_2	3	Lower	0
CGN17988_2	3	Lower	0
CGN17988_2	3	Lower	0
CGN17988_3	1	Upper	1.28
CGN17988_3	1	Upper	2.92
CGN17988_3	1	Upper	2.89
CGN17988_3	1	Upper	2.35
CGN17988_3	1	Middle	2.28
CGN17988_3	1	Middle	0
CGN17988_3	1	Middle	0.01
CGN17988_3	1	Middle	0.01
CGN17988_3	1	Lower	2.12
CGN17988_3	1	Lower	0.98
CGN17988_3	1	Lower	1.81
CGN17988_3	1	Lower	2.97
CGN17988_3	2	Upper	4
CGN17988_3	2	Upper	3.77
CGN17988_3	2	Upper	3.49
CGN17988_3	2	Upper	3.06
CGN17988_3	2	Middle	NA
CGN17988_3	2	Middle	NA
CGN17988_3	2	Middle	NA
CGN17988_3	2	Middle	NA
CGN17988_3	2	Lower	NA
CGN17988_3	2	Lower	NA
CGN17988_3	2	Lower	NA
CGN17988_3	2	Lower	NA
CGN17988_3	3	Upper	1.33
CGN17988_3	3	Upper	1.67
CGN17988_3	3	Upper	0.7
CGN17988_3	3	Upper	1.83
CGN17988_3	3	Middle	1.52
CGN17988_3	3	Middle	1.91
CGN17988_3	3	Middle	1.18
CGN17988_3	3	Middle	1.48
CGN17988_3	3	Lower	2.73
CGN17988_3	3	Lower	2.79
CGN17988_3	3	Lower	2.06
CGN17988_3	3	Lower	2.5
CGN18024_1	1	Upper	0.55
CGN18024_1	1	Upper	0.88
CGN18024_1	1	Upper	1.9
CGN18024_1	1	Upper	1.27
CGN18024_1	1	Middle	1.57
CGN18024_1	1	Middle	1.68
CGN18024_1	1	Middle	0.46
CGN18024_1	1	Middle	0.28
CGN18024_1	1	Lower	2.27
CGN18024_1	1	Lower	1.47
CGN18024_1	1	Lower	1.3
CGN18024_1	1	Lower	0.8
CGN18024_1	2	Upper	0.24
CGN18024_1	2	Upper	0.24
CGN18024_1	2	Upper	0.24
CGN18024_1	2	Upper	0.24
CGN18024_1	2	Middle	0.24
CGN18024_1	2	Middle	0.24
CGN18024_1	2	Middle	0.24
CGN18024_1	2	Middle	0.24
CGN18024_1	2	Lower	0.24
CGN18024_1	2	Lower	0.24
CGN18024_1	2	Lower	0.24
CGN18024_1	2	Lower	0.24
CGN18024_1	3	Upper	4.88
CGN18024_1	3	Upper	3.06
CGN18024_1	3	Upper	3.5
CGN18024_1	3	Upper	3.65
CGN18024_1	3	Middle	0.01
CGN18024_1	3	Middle	0.02
CGN18024_1	3	Middle	2.21
CGN18024_1	3	Middle	2.26
CGN18024_1	3	Lower	2.65
CGN18024_1	3	Lower	0
CGN18024_1	3	Lower	0
CGN18024_1	3	Lower	0
CGN18024_2	1	Upper	0.55
CGN18024_2	1	Upper	1.1
CGN18024_2	1	Upper	0.78
CGN18024_2	1	Upper	2.85
CGN18024_2	1	Middle	3.8
CGN18024_2	1	Middle	1.16
CGN18024_2	1	Middle	2.46
CGN18024_2	1	Middle	3.94
CGN18024_2	1	Lower	5.39
CGN18024_2	1	Lower	1.1
CGN18024_2	1	Lower	4.51
CGN18024_2	1	Lower	3.19
CGN18024_2	2	Upper	3.82
CGN18024_2	2	Upper	2.39
CGN18024_2	2	Upper	4.05
CGN18024_2	2	Upper	4.62
CGN18024_2	2	Middle	2.03
CGN18024_2	2	Middle	0
CGN18024_2	2	Middle	1.16
CGN18024_2	2	Middle	1.17
CGN18024_2	2	Lower	3.89
CGN18024_2	2	Lower	3.47
CGN18024_2	2	Lower	3.94
CGN18024_2	2	Lower	3.67
CGN18024_2	3	Upper	0
CGN18024_2	3	Upper	0
CGN18024_2	3	Upper	0
CGN18024_2	3	Upper	0
CGN18024_2	3	Middle	0
CGN18024_2	3	Middle	0
CGN18024_2	3	Middle	0
CGN18024_2	3	Middle	0
CGN18024_2	3	Lower	0.78
CGN18024_2	3	Lower	1.02
CGN18024_2	3	Lower	1.03
CGN18024_2	3	Lower	1.03
CGN18024_3	1	Upper	4.03
CGN18024_3	1	Upper	4.69
CGN18024_3	1	Upper	3.85
CGN18024_3	1	Upper	4.91
CGN18024_3	1	Middle	4.46
CGN18024_3	1	Middle	5.69
CGN18024_3	1	Middle	5.14
CGN18024_3	1	Middle	5.39
CGN18024_3	1	Lower	7.02
CGN18024_3	1	Lower	5.54
CGN18024_3	1	Lower	6.52
CGN18024_3	1	Lower	5.36
CGN18024_3	2	Upper	5.42
CGN18024_3	2	Upper	5.82
CGN18024_3	2	Upper	3.07
CGN18024_3	2	Upper	5.91
CGN18024_3	2	Middle	5.38
CGN18024_3	2	Middle	4.52
CGN18024_3	2	Middle	3.9
CGN18024_3	2	Middle	5.96
CGN18024_3	2	Lower	2.4
CGN18024_3	2	Lower	0
CGN18024_3	2	Lower	0
CGN18024_3	2	Lower	0
CGN18024_3	3	Upper	6.28
CGN18024_3	3	Upper	5.14
CGN18024_3	3	Upper	6.57
CGN18024_3	3	Upper	5.17
CGN18024_3	3	Middle	5.54
CGN18024_3	3	Middle	4.98
CGN18024_3	3	Middle	5.61
CGN18024_3	3	Middle	5.15
CGN18024_3	3	Lower	3.24
CGN18024_3	3	Lower	4.15
CGN18024_3	3	Lower	4.99
CGN18024_3	3	Lower	5.73
CGN18025_1	1	Upper	6.85
CGN18025_1	1	Upper	4.74
CGN18025_1	1	Upper	5.9
CGN18025_1	1	Upper	7.51
CGN18025_1	1	Middle	0
CGN18025_1	1	Middle	0
CGN18025_1	1	Middle	5.08
CGN18025_1	1	Middle	4.67
CGN18025_1	1	Lower	5.99
CGN18025_1	1	Lower	4.74
CGN18025_1	1	Lower	6.53
CGN18025_1	1	Lower	5.53
CGN18025_1	2	Upper	4.76
CGN18025_1	2	Upper	3.36
CGN18025_1	2	Upper	6.71
CGN18025_1	2	Upper	5.13
CGN18025_1	2	Middle	5.52
CGN18025_1	2	Middle	4.96
CGN18025_1	2	Middle	6.91
CGN18025_1	2	Middle	4.43
CGN18025_1	2	Lower	5.15
CGN18025_1	2	Lower	6.74
CGN18025_1	2	Lower	6.07
CGN18025_1	2	Lower	6.47
CGN18025_1	3	Upper	4.03
CGN18025_1	3	Upper	4.53
CGN18025_1	3	Upper	5.86
CGN18025_1	3	Upper	0
CGN18025_1	3	Middle	5.1
CGN18025_1	3	Middle	5.29
CGN18025_1	3	Middle	4.67
CGN18025_1	3	Middle	5.38
CGN18025_1	3	Lower	7.42
CGN18025_1	3	Lower	8.55
CGN18025_1	3	Lower	6.43
CGN18025_1	3	Lower	5.92
CGN18025_2	1	Upper	7.14
CGN18025_2	1	Upper	7.23
CGN18025_2	1	Upper	0.01
CGN18025_2	1	Upper	2.51
CGN18025_2	1	Middle	5
CGN18025_2	1	Middle	5.34
CGN18025_2	1	Middle	5.97
CGN18025_2	1	Middle	6.76
CGN18025_2	1	Lower	3.39
CGN18025_2	1	Lower	5.72
CGN18025_2	1	Lower	4.65
CGN18025_2	1	Lower	3.48
CGN18025_2	2	Upper	4.2
CGN18025_2	2	Upper	6.46
CGN18025_2	2	Upper	5.34
CGN18025_2	2	Upper	6.47
CGN18025_2	2	Middle	7.69
CGN18025_2	2	Middle	7.01
CGN18025_2	2	Middle	7.44
CGN18025_2	2	Middle	5.18
CGN18025_2	2	Lower	4.79
CGN18025_2	2	Lower	5.69
CGN18025_2	2	Lower	3.92
CGN18025_2	2	Lower	4.39
CGN18025_2	3	Upper	5.66
CGN18025_2	3	Upper	7.48
CGN18025_2	3	Upper	6.35
CGN18025_2	3	Upper	5.75
CGN18025_2	3	Middle	5.56
CGN18025_2	3	Middle	6.99
CGN18025_2	3	Middle	3.58
CGN18025_2	3	Middle	7.59
CGN18025_2	3	Lower	5.45
CGN18025_2	3	Lower	4.21
CGN18025_2	3	Lower	3.73
CGN18025_2	3	Lower	5.79
CGN18025_3	1	Upper	5.72
CGN18025_3	1	Upper	4.2
CGN18025_3	1	Upper	4.81
CGN18025_3	1	Upper	4.65
CGN18025_3	1	Middle	4.54
CGN18025_3	1	Middle	5.56
CGN18025_3	1	Middle	5.97
CGN18025_3	1	Middle	3.8
CGN18025_3	1	Lower	3.67
CGN18025_3	1	Lower	4.81
CGN18025_3	1	Lower	5.09
CGN18025_3	1	Lower	4.57
CGN18025_3	2	Upper	7.17
CGN18025_3	2	Upper	6.37
CGN18025_3	2	Upper	5.53
CGN18025_3	2	Upper	6.35
CGN18025_3	2	Middle	5.09
CGN18025_3	2	Middle	5.62
CGN18025_3	2	Middle	3.89
CGN18025_3	2	Middle	5.29
CGN18025_3	2	Lower	5.6
CGN18025_3	2	Lower	4.56
CGN18025_3	2	Lower	5.68
CGN18025_3	2	Lower	5.34
CGN18025_3	3	Upper	6.5
CGN18025_3	3	Upper	7.28
CGN18025_3	3	Upper	5.9
CGN18025_3	3	Upper	5.9
CGN18025_3	3	Middle	7.09
CGN18025_3	3	Middle	5.4
CGN18025_3	3	Middle	5.81
CGN18025_3	3	Middle	4.36
CGN18025_3	3	Lower	6.96
CGN18025_3	3	Lower	5.97
CGN18025_3	3	Lower	6.78
CGN18025_3	3	Lower	6.11
CGN18026_1	1	Upper	6.1
CGN18026_1	1	Upper	6.98
CGN18026_1	1	Upper	5.46
CGN18026_1	1	Upper	6.04
CGN18026_1	1	Middle	5.82
CGN18026_1	1	Middle	6.54
CGN18026_1	1	Middle	6.62
CGN18026_1	1	Middle	5.52
CGN18026_1	1	Lower	5.28
CGN18026_1	1	Lower	5.44
CGN18026_1	1	Lower	6.15
CGN18026_1	1	Lower	7.09
CGN18026_1	2	Upper	5.02
CGN18026_1	2	Upper	4.48
CGN18026_1	2	Upper	5.58
CGN18026_1	2	Upper	5.1
CGN18026_1	2	Middle	6.89
CGN18026_1	2	Middle	6.42
CGN18026_1	2	Middle	6.94
CGN18026_1	2	Middle	6.71
CGN18026_1	2	Lower	5.47
CGN18026_1	2	Lower	6.52
CGN18026_1	2	Lower	5.49
CGN18026_1	2	Lower	5.12
CGN18026_1	3	Upper	5.25
CGN18026_1	3	Upper	4.86
CGN18026_1	3	Upper	3.74
CGN18026_1	3	Upper	5.28
CGN18026_1	3	Middle	4.63
CGN18026_1	3	Middle	5.25
CGN18026_1	3	Middle	4.76
CGN18026_1	3	Middle	6.54
CGN18026_1	3	Lower	5.2
CGN18026_1	3	Lower	6.54
CGN18026_1	3	Lower	6.56
CGN18026_1	3	Lower	4.76
CGN18026_2	1	Upper	6.06
CGN18026_2	1	Upper	4.65
CGN18026_2	1	Upper	5.54
CGN18026_2	1	Upper	4.36
CGN18026_2	1	Middle	5.42
CGN18026_2	1	Middle	5.03
CGN18026_2	1	Middle	6.11
CGN18026_2	1	Middle	4.1
CGN18026_2	1	Lower	3.81
CGN18026_2	1	Lower	6.17
CGN18026_2	1	Lower	5.11
CGN18026_2	1	Lower	3.78
CGN18026_2	2	Upper	3.58
CGN18026_2	2	Upper	5.15
CGN18026_2	2	Upper	7.15
CGN18026_2	2	Upper	4.74
CGN18026_2	2	Middle	6.8
CGN18026_2	2	Middle	5.86
CGN18026_2	2	Middle	6.28
CGN18026_2	2	Middle	5.42
CGN18026_2	2	Lower	4.78
CGN18026_2	2	Lower	4.54
CGN18026_2	2	Lower	6.77
CGN18026_2	2	Lower	6.26
CGN18026_2	3	Upper	5.78
CGN18026_2	3	Upper	6.07
CGN18026_2	3	Upper	7.51
CGN18026_2	3	Upper	5.74
CGN18026_2	3	Middle	7.04
CGN18026_2	3	Middle	5.19
CGN18026_2	3	Middle	4.07
CGN18026_2	3	Middle	5.32
CGN18026_2	3	Lower	4.08
CGN18026_2	3	Lower	4.85
CGN18026_2	3	Lower	5.93
CGN18026_2	3	Lower	4.27
CGN18026_3	1	Upper	5.36
CGN18026_3	1	Upper	4.45
CGN18026_3	1	Upper	6.03
CGN18026_3	1	Upper	5.11
CGN18026_3	1	Middle	4.7
CGN18026_3	1	Middle	5.57
CGN18026_3	1	Middle	5.14
CGN18026_3	1	Middle	3.3
CGN18026_3	1	Lower	4.33
CGN18026_3	1	Lower	3.31
CGN18026_3	1	Lower	3.25
CGN18026_3	1	Lower	4.74
CGN18026_3	2	Upper	5.24
CGN18026_3	2	Upper	7.02
CGN18026_3	2	Upper	7.72
CGN18026_3	2	Upper	6.94
CGN18026_3	2	Middle	7.09
CGN18026_3	2	Middle	4.95
CGN18026_3	2	Middle	6.39
CGN18026_3	2	Middle	6.71
CGN18026_3	2	Lower	5.26
CGN18026_3	2	Lower	4.29
CGN18026_3	2	Lower	6.41
CGN18026_3	2	Lower	5.73
CGN18026_3	3	Upper	4.96
CGN18026_3	3	Upper	6.31
CGN18026_3	3	Upper	4.59
CGN18026_3	3	Upper	4.6
CGN18026_3	3	Middle	5.22
CGN18026_3	3	Middle	5.13
CGN18026_3	3	Middle	5.64
CGN18026_3	3	Middle	6.34
CGN18026_3	3	Lower	5.43
CGN18026_3	3	Lower	5.68
CGN18026_3	3	Lower	6.67
CGN18026_3	3	Lower	5.44
CGN18027_1	1	Upper	0
CGN18027_1	1	Upper	0
CGN18027_1	1	Upper	0.02
CGN18027_1	1	Upper	0.05
CGN18027_1	1	Middle	0.05
CGN18027_1	1	Middle	0.06
CGN18027_1	1	Middle	0.06
CGN18027_1	1	Middle	0.06
CGN18027_1	1	Lower	0.06
CGN18027_1	1	Lower	0.06
CGN18027_1	1	Lower	0.06
CGN18027_1	1	Lower	0.06
CGN18027_1	2	Upper	0
CGN18027_1	2	Upper	0.01
CGN18027_1	2	Upper	0.01
CGN18027_1	2	Upper	0.01
CGN18027_1	2	Middle	0.01
CGN18027_1	2	Middle	0.01
CGN18027_1	2	Middle	0.6
CGN18027_1	2	Middle	0.6
CGN18027_1	2	Lower	0
CGN18027_1	2	Lower	0
CGN18027_1	2	Lower	0.5
CGN18027_1	2	Lower	0.56
CGN18027_1	3	Upper	1.13
CGN18027_1	3	Upper	1.13
CGN18027_1	3	Upper	1.13
CGN18027_1	3	Upper	1.13
CGN18027_1	3	Middle	1.13
CGN18027_1	3	Middle	1.13
CGN18027_1	3	Middle	1.13
CGN18027_1	3	Middle	1.13
CGN18027_1	3	Lower	1.13
CGN18027_1	3	Lower	1.13
CGN18027_1	3	Lower	1.13
CGN18027_1	3	Lower	1.13
CGN18027_2	1	Upper	3.32
CGN18027_2	1	Upper	5.15
CGN18027_2	1	Upper	3.12
CGN18027_2	1	Upper	6.1
CGN18027_2	1	Middle	5.18
CGN18027_2	1	Middle	4.61
CGN18027_2	1	Middle	4.83
CGN18027_2	1	Middle	4.83
CGN18027_2	1	Lower	4.02
CGN18027_2	1	Lower	3.53
CGN18027_2	1	Lower	3.88
CGN18027_2	1	Lower	4.01
CGN18027_2	2	Upper	6.07
CGN18027_2	2	Upper	4.48
CGN18027_2	2	Upper	5.83
CGN18027_2	2	Upper	4.6
CGN18027_2	2	Middle	7.08
CGN18027_2	2	Middle	5.54
CGN18027_2	2	Middle	4.11
CGN18027_2	2	Middle	5.56
CGN18027_2	2	Lower	5.1
CGN18027_2	2	Lower	4.2
CGN18027_2	2	Lower	4.76
CGN18027_2	2	Lower	5.37
CGN18027_2	3	Upper	4.32
CGN18027_2	3	Upper	3.77
CGN18027_2	3	Upper	4.71
CGN18027_2	3	Upper	3.25
CGN18027_2	3	Middle	4.29
CGN18027_2	3	Middle	4.04
CGN18027_2	3	Middle	4.6
CGN18027_2	3	Middle	4.62
CGN18027_2	3	Lower	3.41
CGN18027_2	3	Lower	5.19
CGN18027_2	3	Lower	2.55
CGN18027_2	3	Lower	5.09
CGN18027_3	1	Upper	0.7
CGN18027_3	1	Upper	0
CGN18027_3	1	Upper	0
CGN18027_3	1	Upper	2.27
CGN18027_3	1	Middle	0
CGN18027_3	1	Middle	0
CGN18027_3	1	Middle	0
CGN18027_3	1	Middle	0
CGN18027_3	1	Lower	0
CGN18027_3	1	Lower	0
CGN18027_3	1	Lower	0
CGN18027_3	1	Lower	0
CGN18027_3	2	Upper	2.09
CGN18027_3	2	Upper	0.97
CGN18027_3	2	Upper	2.6
CGN18027_3	2	Upper	3.58
CGN18027_3	2	Middle	4.56
CGN18027_3	2	Middle	3.81
CGN18027_3	2	Middle	3.96
CGN18027_3	2	Middle	2.08
CGN18027_3	2	Lower	2.86
CGN18027_3	2	Lower	4.66
CGN18027_3	2	Lower	5.03
CGN18027_3	2	Lower	5.02
CGN18027_3	3	Upper	3.7
CGN18027_3	3	Upper	4.08
CGN18027_3	3	Upper	3.08
CGN18027_3	3	Upper	4.25
CGN18027_3	3	Middle	4.56
CGN18027_3	3	Middle	0.04
CGN18027_3	3	Middle	1.07
CGN18027_3	3	Middle	0
CGN18027_3	3	Lower	0.07
CGN18027_3	3	Lower	0.11
CGN18027_3	3	Lower	0.17
CGN18027_3	3	Lower	0.18
CGN18215_1	1	Upper	0.35
CGN18215_1	1	Upper	0.72
CGN18215_1	1	Upper	1.07
CGN18215_1	1	Upper	0.36
CGN18215_1	1	Middle	0.38
CGN18215_1	1	Middle	0.38
CGN18215_1	1	Middle	0.38
CGN18215_1	1	Middle	0.38
CGN18215_1	1	Lower	0.38
CGN18215_1	1	Lower	0.38
CGN18215_1	1	Lower	0.38
CGN18215_1	1	Lower	0.38
CGN18215_1	2	Upper	0
CGN18215_1	2	Upper	0
CGN18215_1	2	Upper	0.62
CGN18215_1	2	Upper	0.62
CGN18215_1	2	Middle	0.62
CGN18215_1	2	Middle	0.62
CGN18215_1	2	Middle	0.62
CGN18215_1	2	Middle	0.62
CGN18215_1	2	Lower	0
CGN18215_1	2	Lower	0.24
CGN18215_1	2	Lower	0.24
CGN18215_1	2	Lower	0.24
CGN18215_1	3	Upper	4.34
CGN18215_1	3	Upper	2.93
CGN18215_1	3	Upper	5.39
CGN18215_1	3	Upper	3.27
CGN18215_1	3	Middle	4.39
CGN18215_1	3	Middle	2.48
CGN18215_1	3	Middle	4.65
CGN18215_1	3	Middle	4.92
CGN18215_1	3	Lower	0
CGN18215_1	3	Lower	0.01
CGN18215_1	3	Lower	0.01
CGN18215_1	3	Lower	0.01
CGN18215_2	1	Upper	0.68
CGN18215_2	1	Upper	0.66
CGN18215_2	1	Upper	0.66
CGN18215_2	1	Upper	1.53
CGN18215_2	1	Middle	0.6
CGN18215_2	1	Middle	0.6
CGN18215_2	1	Middle	0.6
CGN18215_2	1	Middle	0.6
CGN18215_2	1	Lower	0.86
CGN18215_2	1	Lower	0.89
CGN18215_2	1	Lower	0.89
CGN18215_2	1	Lower	0.89
CGN18215_2	2	Upper	0.02
CGN18215_2	2	Upper	0.03
CGN18215_2	2	Upper	1
CGN18215_2	2	Upper	1
CGN18215_2	2	Middle	1.01
CGN18215_2	2	Middle	1.01
CGN18215_2	2	Middle	0
CGN18215_2	2	Middle	0
CGN18215_2	2	Lower	0.2
CGN18215_2	2	Lower	0.22
CGN18215_2	2	Lower	0.22
CGN18215_2	2	Lower	0.22
CGN18215_2	3	Upper	2.85
CGN18215_2	3	Upper	4.04
CGN18215_2	3	Upper	1.75
CGN18215_2	3	Upper	2.66
CGN18215_2	3	Middle	0.01
CGN18215_2	3	Middle	0.02
CGN18215_2	3	Middle	0.02
CGN18215_2	3	Middle	0.03
CGN18215_2	3	Lower	2.66
CGN18215_2	3	Lower	2.54
CGN18215_2	3	Lower	3.39
CGN18215_2	3	Lower	1.27
CGN18215_3	1	Upper	0.52
CGN18215_3	1	Upper	0.53
CGN18215_3	1	Upper	2.36
CGN18215_3	1	Upper	2.75
CGN18215_3	1	Middle	3.99
CGN18215_3	1	Middle	3.12
CGN18215_3	1	Middle	3.65
CGN18215_3	1	Middle	5.01
CGN18215_3	1	Lower	1.77
CGN18215_3	1	Lower	3.83
CGN18215_3	1	Lower	3.36
CGN18215_3	1	Lower	3.76
CGN18215_3	2	Upper	0
CGN18215_3	2	Upper	0.01
CGN18215_3	2	Upper	0.86
CGN18215_3	2	Upper	0.86
CGN18215_3	2	Middle	0
CGN18215_3	2	Middle	0.34
CGN18215_3	2	Middle	0.34
CGN18215_3	2	Middle	0.34
CGN18215_3	2	Lower	0
CGN18215_3	2	Lower	0.01
CGN18215_3	2	Lower	0.01
CGN18215_3	2	Lower	0.01
CGN18215_3	3	Upper	3.82
CGN18215_3	3	Upper	4.28
CGN18215_3	3	Upper	4.68
CGN18215_3	3	Upper	2.36
CGN18215_3	3	Middle	2.68
CGN18215_3	3	Middle	3.91
CGN18215_3	3	Middle	3.41
CGN18215_3	3	Middle	2.34
CGN18215_3	3	Lower	2.27
CGN18215_3	3	Lower	3.62
CGN18215_3	3	Lower	3.39
CGN18215_3	3	Lower	3.04
CGN18328_1	1	Upper	4.51
CGN18328_1	1	Upper	3.51
CGN18328_1	1	Upper	2.69
CGN18328_1	1	Upper	4.09
CGN18328_1	1	Middle	3.23
CGN18328_1	1	Middle	1.76
CGN18328_1	1	Middle	3.08
CGN18328_1	1	Middle	3.61
CGN18328_1	1	Lower	4.52
CGN18328_1	1	Lower	3.2
CGN18328_1	1	Lower	4.04
CGN18328_1	1	Lower	4.15
CGN18328_1	2	Upper	0.2
CGN18328_1	2	Upper	0.23
CGN18328_1	2	Upper	0.72
CGN18328_1	2	Upper	0.72
CGN18328_1	2	Middle	0.72
CGN18328_1	2	Middle	0.73
CGN18328_1	2	Middle	0.73
CGN18328_1	2	Middle	0.73
CGN18328_1	2	Lower	0.73
CGN18328_1	2	Lower	0.73
CGN18328_1	2	Lower	0.73
CGN18328_1	2	Lower	0.74
CGN18328_1	3	Upper	1.04
CGN18328_1	3	Upper	0
CGN18328_1	3	Upper	0.03
CGN18328_1	3	Upper	0.03
CGN18328_1	3	Middle	0
CGN18328_1	3	Middle	0
CGN18328_1	3	Middle	0
CGN18328_1	3	Middle	0
CGN18328_1	3	Lower	1.72
CGN18328_1	3	Lower	1.15
CGN18328_1	3	Lower	0.83
CGN18328_1	3	Lower	0
CGN18328_2	1	Upper	0.43
CGN18328_2	1	Upper	0.43
CGN18328_2	1	Upper	0.43
CGN18328_2	1	Upper	0.43
CGN18328_2	1	Middle	0.36
CGN18328_2	1	Middle	0.36
CGN18328_2	1	Middle	0.36
CGN18328_2	1	Middle	0.36
CGN18328_2	1	Lower	0.42
CGN18328_2	1	Lower	0.42
CGN18328_2	1	Lower	0.42
CGN18328_2	1	Lower	0.42
CGN18328_2	2	Upper	0.6
CGN18328_2	2	Upper	0.6
CGN18328_2	2	Upper	0.6
CGN18328_2	2	Upper	0.6
CGN18328_2	2	Middle	0.37
CGN18328_2	2	Middle	0.37
CGN18328_2	2	Middle	0.37
CGN18328_2	2	Middle	0.37
CGN18328_2	2	Lower	0.37
CGN18328_2	2	Lower	0.37
CGN18328_2	2	Lower	0.37
CGN18328_2	2	Lower	0.37
CGN18328_2	3	Upper	1.37
CGN18328_2	3	Upper	1.37
CGN18328_2	3	Upper	1.37
CGN18328_2	3	Upper	1.37
CGN18328_2	3	Middle	0.49
CGN18328_2	3	Middle	0.49
CGN18328_2	3	Middle	0.49
CGN18328_2	3	Middle	0.49
CGN18328_2	3	Lower	0.49
CGN18328_2	3	Lower	0.49
CGN18328_2	3	Lower	0.49
CGN18328_2	3	Lower	0
CGN18328_3	1	Upper	6.53
CGN18328_3	1	Upper	3.88
CGN18328_3	1	Upper	6.36
CGN18328_3	1	Upper	3.43
CGN18328_3	1	Middle	5.3
CGN18328_3	1	Middle	6.15
CGN18328_3	1	Middle	3.55
CGN18328_3	1	Middle	5.67
CGN18328_3	1	Lower	7.2
CGN18328_3	1	Lower	3.48
CGN18328_3	1	Lower	5.1
CGN18328_3	1	Lower	4.23
CGN18328_3	2	Upper	1.38
CGN18328_3	2	Upper	4.69
CGN18328_3	2	Upper	2.3
CGN18328_3	2	Upper	1.89
CGN18328_3	2	Middle	4.51
CGN18328_3	2	Middle	4.88
CGN18328_3	2	Middle	4.41
CGN18328_3	2	Middle	5.61
CGN18328_3	2	Lower	5.67
CGN18328_3	2	Lower	4.08
CGN18328_3	2	Lower	0.89
CGN18328_3	2	Lower	4.34
CGN18328_3	3	Upper	0
CGN18328_3	3	Upper	0
CGN18328_3	3	Upper	0
CGN18328_3	3	Upper	0
CGN18328_3	3	Middle	0
CGN18328_3	3	Middle	0
CGN18328_3	3	Middle	0
CGN18328_3	3	Middle	0.01
CGN18328_3	3	Lower	0
CGN18328_3	3	Lower	0
CGN18328_3	3	Lower	0
CGN18328_3	3	Lower	0
CGN18329_1	1	Upper	3.6
CGN18329_1	1	Upper	1.09
CGN18329_1	1	Upper	3.84
CGN18329_1	1	Upper	4.14
CGN18329_1	1	Middle	5.41
CGN18329_1	1	Middle	3.06
CGN18329_1	1	Middle	5.76
CGN18329_1	1	Middle	4.77
CGN18329_1	1	Lower	NA
CGN18329_1	1	Lower	NA
CGN18329_1	1	Lower	NA
CGN18329_1	1	Lower	NA
CGN18329_1	2	Upper	5.15
CGN18329_1	2	Upper	6.82
CGN18329_1	2	Upper	5.96
CGN18329_1	2	Upper	4.81
CGN18329_1	2	Middle	4.93
CGN18329_1	2	Middle	6.22
CGN18329_1	2	Middle	6.76
CGN18329_1	2	Middle	5.5
CGN18329_1	2	Lower	7.14
CGN18329_1	2	Lower	5.94
CGN18329_1	2	Lower	3.36
CGN18329_1	2	Lower	3.36
CGN18329_1	3	Upper	8.08
CGN18329_1	3	Upper	6.8
CGN18329_1	3	Upper	8.44
CGN18329_1	3	Upper	11
CGN18329_1	3	Middle	6.34
CGN18329_1	3	Middle	5.97
CGN18329_1	3	Middle	7.9
CGN18329_1	3	Middle	6.34
CGN18329_1	3	Lower	6.34
CGN18329_1	3	Lower	5.97
CGN18329_1	3	Lower	7.9
CGN18329_1	3	Lower	6.34
CGN18329_2	1	Upper	8.66
CGN18329_2	1	Upper	6.8
CGN18329_2	1	Upper	9.78
CGN18329_2	1	Upper	7.96
CGN18329_2	1	Middle	8.6
CGN18329_2	1	Middle	9.55
CGN18329_2	1	Middle	9.17
CGN18329_2	1	Middle	6.58
CGN18329_2	1	Lower	8.97
CGN18329_2	1	Lower	5.09
CGN18329_2	1	Lower	5.97
CGN18329_2	1	Lower	5.97
CGN18329_2	2	Upper	5.02
CGN18329_2	2	Upper	5.74
CGN18329_2	2	Upper	6.45
CGN18329_2	2	Upper	4.89
CGN18329_2	2	Middle	4.13
CGN18329_2	2	Middle	5.52
CGN18329_2	2	Middle	6.71
CGN18329_2	2	Middle	4.9
CGN18329_2	2	Lower	4.66
CGN18329_2	2	Lower	4.42
CGN18329_2	2	Lower	5.15
CGN18329_2	2	Lower	4.93
CGN18329_2	3	Upper	4.48
CGN18329_2	3	Upper	3.06
CGN18329_2	3	Upper	5.01
CGN18329_2	3	Upper	4.31
CGN18329_2	3	Middle	5.75
CGN18329_2	3	Middle	5.91
CGN18329_2	3	Middle	3.99
CGN18329_2	3	Middle	4.22
CGN18329_2	3	Lower	5.9
CGN18329_2	3	Lower	4.29
CGN18329_2	3	Lower	5.03
CGN18329_2	3	Lower	5.37
CGN18329_3	1	Upper	7.76
CGN18329_3	1	Upper	5.17
CGN18329_3	1	Upper	9.08
CGN18329_3	1	Upper	6.11
CGN18329_3	1	Middle	7.66
CGN18329_3	1	Middle	6.49
CGN18329_3	1	Middle	7.02
CGN18329_3	1	Middle	7.47
CGN18329_3	1	Lower	5.96
CGN18329_3	1	Lower	7.96
CGN18329_3	1	Lower	5.36
CGN18329_3	1	Lower	6.85
CGN18329_3	2	Upper	6.35
CGN18329_3	2	Upper	6.72
CGN18329_3	2	Upper	7.72
CGN18329_3	2	Upper	4.75
CGN18329_3	2	Middle	6.02
CGN18329_3	2	Middle	4.22
CGN18329_3	2	Middle	6.13
CGN18329_3	2	Middle	5.48
CGN18329_3	2	Lower	2.72
CGN18329_3	2	Lower	2.52
CGN18329_3	2	Lower	4.91
CGN18329_3	2	Lower	3.58
CGN18329_3	3	Upper	7.2
CGN18329_3	3	Upper	3.93
CGN18329_3	3	Upper	6.2
CGN18329_3	3	Upper	5.44
CGN18329_3	3	Middle	7.5
CGN18329_3	3	Middle	1.29
CGN18329_3	3	Middle	NA
CGN18329_3	3	Middle	NA
CGN18329_3	3	Lower	NA
CGN18329_3	3	Lower	NA
CGN18329_3	3	Lower	NA
CGN18329_3	3	Lower	NA
CGN21353_1	1	Upper	8.64
CGN21353_1	1	Upper	5.8
CGN21353_1	1	Upper	5.49
CGN21353_1	1	Upper	6.82
CGN21353_1	1	Middle	5.58
CGN21353_1	1	Middle	6.96
CGN21353_1	1	Middle	5.39
CGN21353_1	1	Middle	5.22
CGN21353_1	1	Lower	5.35
CGN21353_1	1	Lower	4.65
CGN21353_1	1	Lower	4.44
CGN21353_1	1	Lower	5.74
CGN21353_1	2	Upper	5.26
CGN21353_1	2	Upper	4.62
CGN21353_1	2	Upper	5.18
CGN21353_1	2	Upper	1.11
CGN21353_1	2	Middle	3.89
CGN21353_1	2	Middle	3.75
CGN21353_1	2	Middle	4.15
CGN21353_1	2	Middle	4.04
CGN21353_1	2	Lower	1.68
CGN21353_1	2	Lower	3.91
CGN21353_1	2	Lower	4.63
CGN21353_1	2	Lower	3.94
CGN21353_1	3	Upper	3.6
CGN21353_1	3	Upper	5.52
CGN21353_1	3	Upper	4.91
CGN21353_1	3	Upper	4.2
CGN21353_1	3	Middle	4.65
CGN21353_1	3	Middle	5.64
CGN21353_1	3	Middle	4.95
CGN21353_1	3	Middle	6.25
CGN21353_1	3	Lower	5.07
CGN21353_1	3	Lower	5.07
CGN21353_1	3	Lower	4.83
CGN21353_1	3	Lower	5.95
CGN21353_2	1	Upper	6
CGN21353_2	1	Upper	4.41
CGN21353_2	1	Upper	6
CGN21353_2	1	Upper	5.56
CGN21353_2	1	Middle	5.9
CGN21353_2	1	Middle	5.08
CGN21353_2	1	Middle	5.44
CGN21353_2	1	Middle	6.33
CGN21353_2	1	Lower	4.7
CGN21353_2	1	Lower	4.7
CGN21353_2	1	Lower	4.86
CGN21353_2	1	Lower	5.27
CGN21353_2	2	Upper	4.94
CGN21353_2	2	Upper	6.78
CGN21353_2	2	Upper	7.39
CGN21353_2	2	Upper	6.39
CGN21353_2	2	Middle	4.71
CGN21353_2	2	Middle	4.36
CGN21353_2	2	Middle	5.24
CGN21353_2	2	Middle	6.65
CGN21353_2	2	Lower	4.69
CGN21353_2	2	Lower	4.4
CGN21353_2	2	Lower	6.07
CGN21353_2	2	Lower	5.05
CGN21353_2	3	Upper	3.4
CGN21353_2	3	Upper	2.04
CGN21353_2	3	Upper	4.5
CGN21353_2	3	Upper	2.88
CGN21353_2	3	Middle	6.18
CGN21353_2	3	Middle	5.73
CGN21353_2	3	Middle	6.41
CGN21353_2	3	Middle	5.76
CGN21353_2	3	Lower	3.94
CGN21353_2	3	Lower	4.3
CGN21353_2	3	Lower	4.75
CGN21353_2	3	Lower	5.07
CGN21359_1	1	Upper	NA
CGN21359_1	1	Upper	NA
CGN21359_1	1	Upper	NA
CGN21359_1	1	Upper	NA
CGN21359_1	1	Middle	NA
CGN21359_1	1	Middle	NA
CGN21359_1	1	Middle	NA
CGN21359_1	1	Middle	NA
CGN21359_1	1	Lower	NA
CGN21359_1	1	Lower	NA
CGN21359_1	1	Lower	NA
CGN21359_1	1	Lower	NA
CGN21359_1	2	Upper	6.64
CGN21359_1	2	Upper	5.66
CGN21359_1	2	Upper	6.97
CGN21359_1	2	Upper	6.11
CGN21359_1	2	Middle	3.75
CGN21359_1	2	Middle	4.44
CGN21359_1	2	Middle	4.8
CGN21359_1	2	Middle	4.63
CGN21359_1	2	Lower	5.73
CGN21359_1	2	Lower	5.29
CGN21359_1	2	Lower	6.35
CGN21359_1	2	Lower	6.07
CGN21359_1	3	Upper	3.9
CGN21359_1	3	Upper	4.35
CGN21359_1	3	Upper	3.59
CGN21359_1	3	Upper	4.96
CGN21359_1	3	Middle	6.25
CGN21359_1	3	Middle	5.16
CGN21359_1	3	Middle	5.83
CGN21359_1	3	Middle	5.96
CGN21359_1	3	Lower	NA
CGN21359_1	3	Lower	NA
CGN21359_1	3	Lower	NA
CGN21359_1	3	Lower	NA
CGN21359_2	1	Upper	5.29
CGN21359_2	1	Upper	4.12
CGN21359_2	1	Upper	5.3
CGN21359_2	1	Upper	3.46
CGN21359_2	1	Middle	6.5
CGN21359_2	1	Middle	4.75
CGN21359_2	1	Middle	2.8
CGN21359_2	1	Middle	4.63
CGN21359_2	1	Lower	3.8
CGN21359_2	1	Lower	3.26
CGN21359_2	1	Lower	4.19
CGN21359_2	1	Lower	0
CGN21359_2	2	Upper	5.36
CGN21359_2	2	Upper	4.14
CGN21359_2	2	Upper	4.78
CGN21359_2	2	Upper	4.46
CGN21359_2	2	Middle	4.07
CGN21359_2	2	Middle	4.29
CGN21359_2	2	Middle	4.88
CGN21359_2	2	Middle	3.27
CGN21359_2	2	Lower	3.13
CGN21359_2	2	Lower	4.1
CGN21359_2	2	Lower	3.46
CGN21359_2	2	Lower	3.11
CGN21359_2	3	Upper	NA
CGN21359_2	3	Upper	NA
CGN21359_2	3	Upper	NA
CGN21359_2	3	Upper	NA
CGN21359_2	3	Middle	NA
CGN21359_2	3	Middle	NA
CGN21359_2	3	Middle	NA
CGN21359_2	3	Middle	NA
CGN21359_2	3	Lower	NA
CGN21359_2	3	Lower	NA
CGN21359_2	3	Lower	NA
CGN21359_2	3	Lower	NA
CGN21359_3	1	Upper	0.57
CGN21359_3	1	Upper	0.57
CGN21359_3	1	Upper	0
CGN21359_3	1	Upper	0
CGN21359_3	1	Middle	0.02
CGN21359_3	1	Middle	0.02
CGN21359_3	1	Middle	0.02
CGN21359_3	1	Middle	0.39
CGN21359_3	1	Lower	0.39
CGN21359_3	1	Lower	0
CGN21359_3	1	Lower	0
CGN21359_3	1	Lower	2.69
CGN21359_3	2	Upper	0
CGN21359_3	2	Upper	0
CGN21359_3	2	Upper	0.68
CGN21359_3	2	Upper	0.68
CGN21359_3	2	Middle	0
CGN21359_3	2	Middle	0
CGN21359_3	2	Middle	0
CGN21359_3	2	Middle	0
CGN21359_3	2	Lower	0
CGN21359_3	2	Lower	0
CGN21359_3	2	Lower	0
CGN21359_3	2	Lower	0
CGN21359_3	3	Upper	0
CGN21359_3	3	Upper	0
CGN21359_3	3	Upper	0
CGN21359_3	3	Upper	0
CGN21359_3	3	Middle	0
CGN21359_3	3	Middle	0
CGN21359_3	3	Middle	0
CGN21359_3	3	Middle	0
CGN21359_3	3	Lower	0
CGN21359_3	3	Lower	0
CGN21359_3	3	Lower	0
CGN21359_3	3	Lower	0
CGN22352_1	1	Upper	5.34
CGN22352_1	1	Upper	5.95
CGN22352_1	1	Upper	4.59
CGN22352_1	1	Upper	5.19
CGN22352_1	1	Middle	6.69
CGN22352_1	1	Middle	5.98
CGN22352_1	1	Middle	6.39
CGN22352_1	1	Middle	5.44
CGN22352_1	1	Lower	3.57
CGN22352_1	1	Lower	3.71
CGN22352_1	1	Lower	5.3
CGN22352_1	1	Lower	6.23
CGN22352_1	2	Upper	6.03
CGN22352_1	2	Upper	7.24
CGN22352_1	2	Upper	5.16
CGN22352_1	2	Upper	7.79
CGN22352_1	2	Middle	5.92
CGN22352_1	2	Middle	6.53
CGN22352_1	2	Middle	6.78
CGN22352_1	2	Middle	5.37
CGN22352_1	2	Lower	6.75
CGN22352_1	2	Lower	7.42
CGN22352_1	2	Lower	5.71
CGN22352_1	2	Lower	5.27
CGN22352_1	3	Upper	5.88
CGN22352_1	3	Upper	4.2
CGN22352_1	3	Upper	6.58
CGN22352_1	3	Upper	8.12
CGN22352_1	3	Middle	6.26
CGN22352_1	3	Middle	5.07
CGN22352_1	3	Middle	6.93
CGN22352_1	3	Middle	7.76
CGN22352_1	3	Lower	5.59
CGN22352_1	3	Lower	4.99
CGN22352_1	3	Lower	6.33
CGN22352_1	3	Lower	4.46
CGN22352_2	1	Upper	6.37
CGN22352_2	1	Upper	5.47
CGN22352_2	1	Upper	4.43
CGN22352_2	1	Upper	5.2
CGN22352_2	1	Middle	7.95
CGN22352_2	1	Middle	6.59
CGN22352_2	1	Middle	5.55
CGN22352_2	1	Middle	7.29
CGN22352_2	1	Lower	4.15
CGN22352_2	1	Lower	4.37
CGN22352_2	1	Lower	4.69
CGN22352_2	1	Lower	4.18
CGN22352_2	2	Upper	8.57
CGN22352_2	2	Upper	6.97
CGN22352_2	2	Upper	5.73
CGN22352_2	2	Upper	6.82
CGN22352_2	2	Middle	7.38
CGN22352_2	2	Middle	3.89
CGN22352_2	2	Middle	6.94
CGN22352_2	2	Middle	9.14
CGN22352_2	2	Lower	8.32
CGN22352_2	2	Lower	8.93
CGN22352_2	2	Lower	7.71
CGN22352_2	2	Lower	5.56
CGN22352_2	3	Upper	7.2
CGN22352_2	3	Upper	5.9
CGN22352_2	3	Upper	7.39
CGN22352_2	3	Upper	8.79
CGN22352_2	3	Middle	7.36
CGN22352_2	3	Middle	7.45
CGN22352_2	3	Middle	6.41
CGN22352_2	3	Middle	6.59
CGN22352_2	3	Lower	9.54
CGN22352_2	3	Lower	8.1
CGN22352_2	3	Lower	6.22
CGN22352_2	3	Lower	8
CGN23491_1	1	Upper	0.37
CGN23491_1	1	Upper	0.44
CGN23491_1	1	Upper	0
CGN23491_1	1	Upper	0
CGN23491_1	1	Middle	0.39
CGN23491_1	1	Middle	0.39
CGN23491_1	1	Middle	0.39
CGN23491_1	1	Middle	0.39
CGN23491_1	1	Lower	0.39
CGN23491_1	1	Lower	0.39
CGN23491_1	1	Lower	0.39
CGN23491_1	1	Lower	0
CGN23491_1	2	Upper	0.65
CGN23491_1	2	Upper	0.65
CGN23491_1	2	Upper	0.66
CGN23491_1	2	Upper	0.66
CGN23491_1	2	Middle	0
CGN23491_1	2	Middle	0.02
CGN23491_1	2	Middle	0.4
CGN23491_1	2	Middle	0.4
CGN23491_1	2	Lower	0.05
CGN23491_1	2	Lower	0.05
CGN23491_1	2	Lower	0.05
CGN23491_1	2	Lower	0.05
CGN23491_1	3	Upper	0.48
CGN23491_1	3	Upper	0.51
CGN23491_1	3	Upper	1.01
CGN23491_1	3	Upper	0.01
CGN23491_1	3	Middle	0.63
CGN23491_1	3	Middle	0.01
CGN23491_1	3	Middle	0.02
CGN23491_1	3	Middle	0
CGN23491_1	3	Lower	0
CGN23491_1	3	Lower	0
CGN23491_1	3	Lower	0
CGN23491_1	3	Lower	0
CGN23491_2	1	Upper	2.16
CGN23491_2	1	Upper	2.3
CGN23491_2	1	Upper	1.81
CGN23491_2	1	Upper	1.76
CGN23491_2	1	Middle	1.77
CGN23491_2	1	Middle	2.87
CGN23491_2	1	Middle	0.35
CGN23491_2	1	Middle	1.66
CGN23491_2	1	Lower	NA
CGN23491_2	1	Lower	NA
CGN23491_2	1	Lower	NA
CGN23491_2	1	Lower	NA
CGN23491_2	2	Upper	0.97
CGN23491_2	2	Upper	1.41
CGN23491_2	2	Upper	0.55
CGN23491_2	2	Upper	1.47
CGN23491_2	2	Middle	0
CGN23491_2	2	Middle	1.11
CGN23491_2	2	Middle	1.8
CGN23491_2	2	Middle	0.76
CGN23491_2	2	Lower	0.26
CGN23491_2	2	Lower	0.61
CGN23491_2	2	Lower	1.57
CGN23491_2	2	Lower	1.12
CGN23491_2	3	Upper	2.79
CGN23491_2	3	Upper	0.98
CGN23491_2	3	Upper	1.1
CGN23491_2	3	Upper	2.5
CGN23491_2	3	Middle	2.23
CGN23491_2	3	Middle	1.62
CGN23491_2	3	Middle	1.83
CGN23491_2	3	Middle	3.08
CGN23491_2	3	Lower	1.97
CGN23491_2	3	Lower	2.32
CGN23491_2	3	Lower	0.91
CGN23491_2	3	Lower	0
CGN23491_3	1	Upper	0.79
CGN23491_3	1	Upper	2.58
CGN23491_3	1	Upper	0.88
CGN23491_3	1	Upper	3.18
CGN23491_3	1	Middle	2.97
CGN23491_3	1	Middle	0.81
CGN23491_3	1	Middle	2.5
CGN23491_3	1	Middle	2.2
CGN23491_3	1	Lower	3.95
CGN23491_3	1	Lower	2.57
CGN23491_3	1	Lower	4.24
CGN23491_3	1	Lower	3.16
CGN23491_3	2	Upper	1.03
CGN23491_3	2	Upper	1.04
CGN23491_3	2	Upper	1.04
CGN23491_3	2	Upper	1.04
CGN23491_3	2	Middle	0.91
CGN23491_3	2	Middle	0.91
CGN23491_3	2	Middle	0.91
CGN23491_3	2	Middle	0.91
CGN23491_3	2	Lower	0.91
CGN23491_3	2	Lower	0.91
CGN23491_3	2	Lower	0.91
CGN23491_3	2	Lower	0.91
CGN23491_3	3	Upper	2.08
CGN23491_3	3	Upper	0.61
CGN23491_3	3	Upper	1.21
CGN23491_3	3	Upper	0.47
CGN23491_3	3	Middle	2.55
CGN23491_3	3	Middle	0.52
CGN23491_3	3	Middle	0.53
CGN23491_3	3	Middle	0.53
CGN23491_3	3	Lower	0
CGN23491_3	3	Lower	0
CGN23491_3	3	Lower	0
CGN23491_3	3	Lower	0
CGN23492_1	1	Upper	2.33
CGN23492_1	1	Upper	0.63
CGN23492_1	1	Upper	0.63
CGN23492_1	1	Upper	3.43
CGN23492_1	1	Middle	1.03
CGN23492_1	1	Middle	1.61
CGN23492_1	1	Middle	2.26
CGN23492_1	1	Middle	1.51
CGN23492_1	1	Lower	3.58
CGN23492_1	1	Lower	1.11
CGN23492_1	1	Lower	0.91
CGN23492_1	1	Lower	1.93
CGN23492_1	2	Upper	0.91
CGN23492_1	2	Upper	0.91
CGN23492_1	2	Upper	0.91
CGN23492_1	2	Upper	0.91
CGN23492_1	2	Middle	1.86
CGN23492_1	2	Middle	2.83
CGN23492_1	2	Middle	1.02
CGN23492_1	2	Middle	1.02
CGN23492_1	2	Lower	0.38
CGN23492_1	2	Lower	0.38
CGN23492_1	2	Lower	0.38
CGN23492_1	2	Lower	0.38
CGN23492_1	3	Upper	0.02
CGN23492_1	3	Upper	0.04
CGN23492_1	3	Upper	0.07
CGN23492_1	3	Upper	0.07
CGN23492_1	3	Middle	0.07
CGN23492_1	3	Middle	0.08
CGN23492_1	3	Middle	0.08
CGN23492_1	3	Middle	0.08
CGN23492_1	3	Lower	0.08
CGN23492_1	3	Lower	0.08
CGN23492_1	3	Lower	0.08
CGN23492_1	3	Lower	0.08
CGN23492_2	1	Upper	1.4
CGN23492_2	1	Upper	0.49
CGN23492_2	1	Upper	0.88
CGN23492_2	1	Upper	0.63
CGN23492_2	1	Middle	0.21
CGN23492_2	1	Middle	0.48
CGN23492_2	1	Middle	0.5
CGN23492_2	1	Middle	1
CGN23492_2	1	Lower	1.22
CGN23492_2	1	Lower	0.77
CGN23492_2	1	Lower	0.5
CGN23492_2	1	Lower	9.16
CGN23492_2	2	Upper	0.63
CGN23492_2	2	Upper	0.63
CGN23492_2	2	Upper	0.65
CGN23492_2	2	Upper	0.65
CGN23492_2	2	Middle	0.66
CGN23492_2	2	Middle	0.66
CGN23492_2	2	Middle	0.66
CGN23492_2	2	Middle	0.66
CGN23492_2	2	Lower	0.66
CGN23492_2	2	Lower	0.66
CGN23492_2	2	Lower	0.66
CGN23492_2	2	Lower	0.66
CGN23492_2	3	Upper	3.43
CGN23492_2	3	Upper	2.44
CGN23492_2	3	Upper	3.72
CGN23492_2	3	Upper	0
CGN23492_2	3	Middle	0.01
CGN23492_2	3	Middle	0.04
CGN23492_2	3	Middle	0
CGN23492_2	3	Middle	0.01
CGN23492_2	3	Lower	0.01
CGN23492_2	3	Lower	0.01
CGN23492_2	3	Lower	0.01
CGN23492_2	3	Lower	0.01
CGN23492_3	1	Upper	0.7
CGN23492_3	1	Upper	0.7
CGN23492_3	1	Upper	0.71
CGN23492_3	1	Upper	1.25
CGN23492_3	1	Middle	0.95
CGN23492_3	1	Middle	0.95
CGN23492_3	1	Middle	0.95
CGN23492_3	1	Middle	0.95
CGN23492_3	1	Lower	1.74
CGN23492_3	1	Lower	0.82
CGN23492_3	1	Lower	0.82
CGN23492_3	1	Lower	1.31
CGN23492_3	2	Upper	2.01
CGN23492_3	2	Upper	2.01
CGN23492_3	2	Upper	0.8
CGN23492_3	2	Upper	0.97
CGN23492_3	2	Middle	1.55
CGN23492_3	2	Middle	0.61
CGN23492_3	2	Middle	0.61
CGN23492_3	2	Middle	0.62
CGN23492_3	2	Lower	0.62
CGN23492_3	2	Lower	0.62
CGN23492_3	2	Lower	0.63
CGN23492_3	2	Lower	0.64
CGN23492_3	3	Upper	4.09
CGN23492_3	3	Upper	1.92
CGN23492_3	3	Upper	0.84
CGN23492_3	3	Upper	3.28
CGN23492_3	3	Middle	3.86
CGN23492_3	3	Middle	2.03
CGN23492_3	3	Middle	3.21
CGN23492_3	3	Middle	0
CGN23492_3	3	Lower	2.66
CGN23492_3	3	Lower	0.27
CGN23492_3	3	Lower	0
CGN23492_3	3	Lower	0
