# Supplementary material for: Tetraose steroidal glycoalkaloids from potato provide resistance against Alternaria solani and Colorado potato beetle
Source: eLife. 2023 Sep 26;12:RP87135. doi: 10.7554/eLife.87135 (PMC10522338; doi:10.7554/eLife.87135)
Supplement: Figure 1—source data 2. [file elife-87135-fig1-data2.xlsx]

## Sheet: Figure 1-source data 2
Genotype	Plant replicate	Cross	Leaf position	Lesion size (mm)
CGN18024_1	1	NA	1	0
CGN18024_1	1	NA	1	0
CGN18024_1	1	NA	1	0
CGN18024_1	1	NA	1	0
CGN18024_1	1	NA	1	0
CGN18024_1	1	NA	1	0
CGN18024_1	1	NA	2	2.23
CGN18024_1	1	NA	2	2.07
CGN18024_1	1	NA	2	2.71
CGN18024_1	1	NA	2	1.23
CGN18024_1	1	NA	2	1.06
CGN18024_1	1	NA	2	0
CGN18024_1	1	NA	3	2.13
CGN18024_1	1	NA	3	2.8
CGN18024_1	1	NA	3	1.78
CGN18024_1	1	NA	3	2.49
CGN18024_1	1	NA	3	2.06
CGN18024_1	1	NA	3	0.84
CGN18024_3	1	NA	1	5.76
CGN18024_3	1	NA	1	5.33
CGN18024_3	1	NA	1	6.42
CGN18024_3	1	NA	1	5.35
CGN18024_3	1	NA	1	5.35
CGN18024_3	1	NA	1	5.35
CGN18024_3	1	NA	2	6.96
CGN18024_3	1	NA	2	6.27
CGN18024_3	1	NA	2	4.3
CGN18024_3	1	NA	2	6.66
CGN18024_3	1	NA	2	7.65
CGN18024_3	1	NA	2	5.17
CGN18024_3	1	NA	3	6.71
CGN18024_3	1	NA	3	4.94
CGN18024_3	1	NA	3	5.82
CGN18024_3	1	NA	3	5.17
CGN18024_3	1	NA	3	6.09
CGN18024_3	1	NA	3	6.51
AJW12_1#1	1	CGN18024_1 x CGN18024_3	1	6.19
AJW12_1#1	1	CGN18024_1 x CGN18024_3	1	5.6
AJW12_1#1	1	CGN18024_1 x CGN18024_3	1	6.18
AJW12_1#1	1	CGN18024_1 x CGN18024_3	1	4.44
AJW12_1#1	1	CGN18024_1 x CGN18024_3	1	5.37
AJW12_1#1	1	CGN18024_1 x CGN18024_3	1	4.7
AJW12_1#1	1	CGN18024_1 x CGN18024_3	2	7.53
AJW12_1#1	1	CGN18024_1 x CGN18024_3	2	6.99
AJW12_1#1	1	CGN18024_1 x CGN18024_3	2	6.66
AJW12_1#1	1	CGN18024_1 x CGN18024_3	2	6.66
AJW12_1#1	1	CGN18024_1 x CGN18024_3	2	6.66
AJW12_1#1	1	CGN18024_1 x CGN18024_3	2	8.26
AJW12_1#1	1	CGN18024_1 x CGN18024_3	3	5.39
AJW12_1#1	1	CGN18024_1 x CGN18024_3	3	6.41
AJW12_1#1	1	CGN18024_1 x CGN18024_3	3	5.37
AJW12_1#1	1	CGN18024_1 x CGN18024_3	3	3.92
AJW12_1#1	1	CGN18024_1 x CGN18024_3	3	5.13
AJW12_1#1	1	CGN18024_1 x CGN18024_3	3	4.35
AJW12_2#2	1	CGN18024_1 x CGN18024_3	1	1.33
AJW12_2#2	1	CGN18024_1 x CGN18024_3	1	1.33
AJW12_2#2	1	CGN18024_1 x CGN18024_3	1	1.35
AJW12_2#2	1	CGN18024_1 x CGN18024_3	1	0.84
AJW12_2#2	1	CGN18024_1 x CGN18024_3	1	0
AJW12_2#2	1	CGN18024_1 x CGN18024_3	1	0
AJW12_2#2	1	CGN18024_1 x CGN18024_3	2	0
AJW12_2#2	1	CGN18024_1 x CGN18024_3	2	0
AJW12_2#2	1	CGN18024_1 x CGN18024_3	2	0
AJW12_2#2	1	CGN18024_1 x CGN18024_3	2	1.56
AJW12_2#2	1	CGN18024_1 x CGN18024_3	2	1.56
AJW12_2#2	1	CGN18024_1 x CGN18024_3	2	1.56
AJW12_2#2	1	CGN18024_1 x CGN18024_3	3	0.01
AJW12_2#2	1	CGN18024_1 x CGN18024_3	3	0.01
AJW12_2#2	1	CGN18024_1 x CGN18024_3	3	0.01
AJW12_2#2	1	CGN18024_1 x CGN18024_3	3	1.78
AJW12_2#2	1	CGN18024_1 x CGN18024_3	3	1.44
AJW12_2#2	1	CGN18024_1 x CGN18024_3	3	0.01
AJW12_3#3	1	CGN18024_1 x CGN18024_3	1	1.38
AJW12_3#3	1	CGN18024_1 x CGN18024_3	1	1.38
AJW12_3#3	1	CGN18024_1 x CGN18024_3	1	2.53
AJW12_3#3	1	CGN18024_1 x CGN18024_3	1	1.1
AJW12_3#3	1	CGN18024_1 x CGN18024_3	1	1.1
AJW12_3#3	1	CGN18024_1 x CGN18024_3	1	1.37
AJW12_3#3	1	CGN18024_1 x CGN18024_3	2	2.58
AJW12_3#3	1	CGN18024_1 x CGN18024_3	2	2.58
AJW12_3#3	1	CGN18024_1 x CGN18024_3	2	2.64
AJW12_3#3	1	CGN18024_1 x CGN18024_3	2	2.64
AJW12_3#3	1	CGN18024_1 x CGN18024_3	2	2.64
AJW12_3#3	1	CGN18024_1 x CGN18024_3	2	2.64
AJW12_3#3	1	CGN18024_1 x CGN18024_3	3	3.59
AJW12_3#3	1	CGN18024_1 x CGN18024_3	3	2.48
AJW12_3#3	1	CGN18024_1 x CGN18024_3	3	2.48
AJW12_3#3	1	CGN18024_1 x CGN18024_3	3	2.48
AJW12_3#3	1	CGN18024_1 x CGN18024_3	3	2.48
AJW12_3#3	1	CGN18024_1 x CGN18024_3	3	2.48
AJW12_4#4	1	CGN18024_1 x CGN18024_3	1	5.45
AJW12_4#4	1	CGN18024_1 x CGN18024_3	1	4.89
AJW12_4#4	1	CGN18024_1 x CGN18024_3	1	6.82
AJW12_4#4	1	CGN18024_1 x CGN18024_3	1	6.25
AJW12_4#4	1	CGN18024_1 x CGN18024_3	1	6.25
AJW12_4#4	1	CGN18024_1 x CGN18024_3	1	5.69
AJW12_4#4	1	CGN18024_1 x CGN18024_3	2	6.22
AJW12_4#4	1	CGN18024_1 x CGN18024_3	2	5.1
AJW12_4#4	1	CGN18024_1 x CGN18024_3	2	6.82
AJW12_4#4	1	CGN18024_1 x CGN18024_3	2	5.77
AJW12_4#4	1	CGN18024_1 x CGN18024_3	2	4.71
AJW12_4#4	1	CGN18024_1 x CGN18024_3	2	4.61
AJW12_4#4	1	CGN18024_1 x CGN18024_3	3	5.67
AJW12_4#4	1	CGN18024_1 x CGN18024_3	3	3.86
AJW12_4#4	1	CGN18024_1 x CGN18024_3	3	5.25
AJW12_4#4	1	CGN18024_1 x CGN18024_3	3	3.84
AJW12_4#4	1	CGN18024_1 x CGN18024_3	3	4.97
AJW12_4#4	1	CGN18024_1 x CGN18024_3	3	0.82
AJW12_5#5	1	CGN18024_1 x CGN18024_3	1	1.9
AJW12_5#5	1	CGN18024_1 x CGN18024_3	1	0.01
AJW12_5#5	1	CGN18024_1 x CGN18024_3	1	1.13
AJW12_5#5	1	CGN18024_1 x CGN18024_3	1	1.64
AJW12_5#5	1	CGN18024_1 x CGN18024_3	1	2.46
AJW12_5#5	1	CGN18024_1 x CGN18024_3	1	2.54
AJW12_5#5	1	CGN18024_1 x CGN18024_3	2	0.22
AJW12_5#5	1	CGN18024_1 x CGN18024_3	2	1.55
AJW12_5#5	1	CGN18024_1 x CGN18024_3	2	1.55
AJW12_5#5	1	CGN18024_1 x CGN18024_3	2	1.55
AJW12_5#5	1	CGN18024_1 x CGN18024_3	2	1.55
AJW12_5#5	1	CGN18024_1 x CGN18024_3	2	1.75
AJW12_5#5	1	CGN18024_1 x CGN18024_3	3	0
AJW12_5#5	1	CGN18024_1 x CGN18024_3	3	2.37
AJW12_5#5	1	CGN18024_1 x CGN18024_3	3	2.37
AJW12_5#5	1	CGN18024_1 x CGN18024_3	3	5.36
AJW12_5#5	1	CGN18024_1 x CGN18024_3	3	3.54
AJW12_5#5	1	CGN18024_1 x CGN18024_3	3	0
AJW12_6#6	1	CGN18024_1 x CGN18024_3	1	NA
AJW12_6#6	1	CGN18024_1 x CGN18024_3	1	NA
AJW12_6#6	1	CGN18024_1 x CGN18024_3	1	NA
AJW12_6#6	1	CGN18024_1 x CGN18024_3	1	NA
AJW12_6#6	1	CGN18024_1 x CGN18024_3	1	NA
AJW12_6#6	1	CGN18024_1 x CGN18024_3	1	NA
AJW12_6#6	1	CGN18024_1 x CGN18024_3	2	6.8
AJW12_6#6	1	CGN18024_1 x CGN18024_3	2	6.21
AJW12_6#6	1	CGN18024_1 x CGN18024_3	2	7.31
AJW12_6#6	1	CGN18024_1 x CGN18024_3	2	5.79
AJW12_6#6	1	CGN18024_1 x CGN18024_3	2	7.36
AJW12_6#6	1	CGN18024_1 x CGN18024_3	2	6.57
AJW12_6#6	1	CGN18024_1 x CGN18024_3	3	8.12
AJW12_6#6	1	CGN18024_1 x CGN18024_3	3	5.7
AJW12_6#6	1	CGN18024_1 x CGN18024_3	3	7.51
AJW12_6#6	1	CGN18024_1 x CGN18024_3	3	7.51
AJW12_6#6	1	CGN18024_1 x CGN18024_3	3	7.01
AJW12_6#6	1	CGN18024_1 x CGN18024_3	3	7.17
AJW12_7#7	1	CGN18024_1 x CGN18024_3	1	4.91
AJW12_7#7	1	CGN18024_1 x CGN18024_3	1	4.23
AJW12_7#7	1	CGN18024_1 x CGN18024_3	1	4.22
AJW12_7#7	1	CGN18024_1 x CGN18024_3	1	4.88
AJW12_7#7	1	CGN18024_1 x CGN18024_3	1	5.03
AJW12_7#7	1	CGN18024_1 x CGN18024_3	1	4.35
AJW12_7#7	1	CGN18024_1 x CGN18024_3	2	3.31
AJW12_7#7	1	CGN18024_1 x CGN18024_3	2	5.15
AJW12_7#7	1	CGN18024_1 x CGN18024_3	2	5.15
AJW12_7#7	1	CGN18024_1 x CGN18024_3	2	5.15
AJW12_7#7	1	CGN18024_1 x CGN18024_3	2	5.15
AJW12_7#7	1	CGN18024_1 x CGN18024_3	2	6.27
AJW12_7#7	1	CGN18024_1 x CGN18024_3	3	3.7
AJW12_7#7	1	CGN18024_1 x CGN18024_3	3	2.22
AJW12_7#7	1	CGN18024_1 x CGN18024_3	3	2.7
AJW12_7#7	1	CGN18024_1 x CGN18024_3	3	3.9
AJW12_7#7	1	CGN18024_1 x CGN18024_3	3	1.27
AJW12_7#7	1	CGN18024_1 x CGN18024_3	3	6.43
AJW12_8#8	1	CGN18024_1 x CGN18024_3	1	0
AJW12_8#8	1	CGN18024_1 x CGN18024_3	1	0
AJW12_8#8	1	CGN18024_1 x CGN18024_3	1	0
AJW12_8#8	1	CGN18024_1 x CGN18024_3	1	0
AJW12_8#8	1	CGN18024_1 x CGN18024_3	1	1.02
AJW12_8#8	1	CGN18024_1 x CGN18024_3	1	2.17
AJW12_8#8	1	CGN18024_1 x CGN18024_3	2	0
AJW12_8#8	1	CGN18024_1 x CGN18024_3	2	0
AJW12_8#8	1	CGN18024_1 x CGN18024_3	2	0
AJW12_8#8	1	CGN18024_1 x CGN18024_3	2	0
AJW12_8#8	1	CGN18024_1 x CGN18024_3	2	0.9
AJW12_8#8	1	CGN18024_1 x CGN18024_3	2	0
AJW12_8#8	1	CGN18024_1 x CGN18024_3	3	NA
AJW12_8#8	1	CGN18024_1 x CGN18024_3	3	NA
AJW12_8#8	1	CGN18024_1 x CGN18024_3	3	NA
AJW12_8#8	1	CGN18024_1 x CGN18024_3	3	NA
AJW12_8#8	1	CGN18024_1 x CGN18024_3	3	NA
AJW12_8#8	1	CGN18024_1 x CGN18024_3	3	NA
AJW12_9#9	1	CGN18024_1 x CGN18024_3	1	0
AJW12_9#9	1	CGN18024_1 x CGN18024_3	1	0
AJW12_9#9	1	CGN18024_1 x CGN18024_3	1	0
AJW12_9#9	1	CGN18024_1 x CGN18024_3	1	0
AJW12_9#9	1	CGN18024_1 x CGN18024_3	1	0
AJW12_9#9	1	CGN18024_1 x CGN18024_3	1	0
AJW12_9#9	1	CGN18024_1 x CGN18024_3	2	0
AJW12_9#9	1	CGN18024_1 x CGN18024_3	2	0
AJW12_9#9	1	CGN18024_1 x CGN18024_3	2	0
AJW12_9#9	1	CGN18024_1 x CGN18024_3	2	0
AJW12_9#9	1	CGN18024_1 x CGN18024_3	2	0
AJW12_9#9	1	CGN18024_1 x CGN18024_3	2	0
AJW12_9#9	1	CGN18024_1 x CGN18024_3	3	1.05
AJW12_9#9	1	CGN18024_1 x CGN18024_3	3	1.4
AJW12_9#9	1	CGN18024_1 x CGN18024_3	3	1.4
AJW12_9#9	1	CGN18024_1 x CGN18024_3	3	0
AJW12_9#9	1	CGN18024_1 x CGN18024_3	3	0
AJW12_9#9	1	CGN18024_1 x CGN18024_3	3	0
AJW12_10#10	1	CGN18024_1 x CGN18024_3	1	4.88
AJW12_10#10	1	CGN18024_1 x CGN18024_3	1	5.45
AJW12_10#10	1	CGN18024_1 x CGN18024_3	1	6.72
AJW12_10#10	1	CGN18024_1 x CGN18024_3	1	6.37
AJW12_10#10	1	CGN18024_1 x CGN18024_3	1	5.65
AJW12_10#10	1	CGN18024_1 x CGN18024_3	1	6.41
AJW12_10#10	1	CGN18024_1 x CGN18024_3	2	5.53
AJW12_10#10	1	CGN18024_1 x CGN18024_3	2	4.94
AJW12_10#10	1	CGN18024_1 x CGN18024_3	2	6.56
AJW12_10#10	1	CGN18024_1 x CGN18024_3	2	6.39
AJW12_10#10	1	CGN18024_1 x CGN18024_3	2	5.85
AJW12_10#10	1	CGN18024_1 x CGN18024_3	2	5.66
AJW12_10#10	1	CGN18024_1 x CGN18024_3	3	4.82
AJW12_10#10	1	CGN18024_1 x CGN18024_3	3	5.34
AJW12_10#10	1	CGN18024_1 x CGN18024_3	3	6.03
AJW12_10#10	1	CGN18024_1 x CGN18024_3	3	5.35
AJW12_10#10	1	CGN18024_1 x CGN18024_3	3	6.02
AJW12_10#10	1	CGN18024_1 x CGN18024_3	3	6.14
AJW12_11#11	1	CGN18024_1 x CGN18024_3	1	5.23
AJW12_11#11	1	CGN18024_1 x CGN18024_3	1	4.68
AJW12_11#11	1	CGN18024_1 x CGN18024_3	1	6.33
AJW12_11#11	1	CGN18024_1 x CGN18024_3	1	5.09
AJW12_11#11	1	CGN18024_1 x CGN18024_3	1	5.41
AJW12_11#11	1	CGN18024_1 x CGN18024_3	1	5.41
AJW12_11#11	1	CGN18024_1 x CGN18024_3	2	6.59
AJW12_11#11	1	CGN18024_1 x CGN18024_3	2	5.95
AJW12_11#11	1	CGN18024_1 x CGN18024_3	2	5.94
AJW12_11#11	1	CGN18024_1 x CGN18024_3	2	5.93
AJW12_11#11	1	CGN18024_1 x CGN18024_3	2	7.06
AJW12_11#11	1	CGN18024_1 x CGN18024_3	2	6.43
AJW12_11#11	1	CGN18024_1 x CGN18024_3	3	7.51
AJW12_11#11	1	CGN18024_1 x CGN18024_3	3	6.49
AJW12_11#11	1	CGN18024_1 x CGN18024_3	3	6.82
AJW12_11#11	1	CGN18024_1 x CGN18024_3	3	5.92
AJW12_11#11	1	CGN18024_1 x CGN18024_3	3	6.3
AJW12_11#11	1	CGN18024_1 x CGN18024_3	3	6.28
AJW12_12#12	1	CGN18024_1 x CGN18024_3	1	0
AJW12_12#12	1	CGN18024_1 x CGN18024_3	1	0.9
AJW12_12#12	1	CGN18024_1 x CGN18024_3	1	1.57
AJW12_12#12	1	CGN18024_1 x CGN18024_3	1	3.14
AJW12_12#12	1	CGN18024_1 x CGN18024_3	1	1.58
AJW12_12#12	1	CGN18024_1 x CGN18024_3	1	1.58
AJW12_12#12	1	CGN18024_1 x CGN18024_3	2	2.03
AJW12_12#12	1	CGN18024_1 x CGN18024_3	2	2.4
AJW12_12#12	1	CGN18024_1 x CGN18024_3	2	3.3
AJW12_12#12	1	CGN18024_1 x CGN18024_3	2	2.88
AJW12_12#12	1	CGN18024_1 x CGN18024_3	2	0
AJW12_12#12	1	CGN18024_1 x CGN18024_3	2	0.94
AJW12_12#12	1	CGN18024_1 x CGN18024_3	3	1.74
AJW12_12#12	1	CGN18024_1 x CGN18024_3	3	2.15
AJW12_12#12	1	CGN18024_1 x CGN18024_3	3	1.84
AJW12_12#12	1	CGN18024_1 x CGN18024_3	3	0
AJW12_12#12	1	CGN18024_1 x CGN18024_3	3	0
AJW12_12#12	1	CGN18024_1 x CGN18024_3	3	1.12
AJW12_13#13	1	CGN18024_1 x CGN18024_3	1	7.58
AJW12_13#13	1	CGN18024_1 x CGN18024_3	1	8.92
AJW12_13#13	1	CGN18024_1 x CGN18024_3	1	7.41
AJW12_13#13	1	CGN18024_1 x CGN18024_3	1	8.35
AJW12_13#13	1	CGN18024_1 x CGN18024_3	1	6.75
AJW12_13#13	1	CGN18024_1 x CGN18024_3	1	4.72
AJW12_13#13	1	CGN18024_1 x CGN18024_3	2	6
AJW12_13#13	1	CGN18024_1 x CGN18024_3	2	6
AJW12_13#13	1	CGN18024_1 x CGN18024_3	2	6.99
AJW12_13#13	1	CGN18024_1 x CGN18024_3	2	7.48
AJW12_13#13	1	CGN18024_1 x CGN18024_3	2	5.83
AJW12_13#13	1	CGN18024_1 x CGN18024_3	2	6.27
AJW12_13#13	1	CGN18024_1 x CGN18024_3	3	7.77
AJW12_13#13	1	CGN18024_1 x CGN18024_3	3	7.63
AJW12_13#13	1	CGN18024_1 x CGN18024_3	3	7.46
AJW12_13#13	1	CGN18024_1 x CGN18024_3	3	7.38
AJW12_13#13	1	CGN18024_1 x CGN18024_3	3	5.93
AJW12_13#13	1	CGN18024_1 x CGN18024_3	3	5.76
AJW12_14#14	1	CGN18024_1 x CGN18024_3	1	6.3
AJW12_14#14	1	CGN18024_1 x CGN18024_3	1	5.75
AJW12_14#14	1	CGN18024_1 x CGN18024_3	1	4.99
AJW12_14#14	1	CGN18024_1 x CGN18024_3	1	5.09
AJW12_14#14	1	CGN18024_1 x CGN18024_3	1	6.07
AJW12_14#14	1	CGN18024_1 x CGN18024_3	1	5.71
AJW12_14#14	1	CGN18024_1 x CGN18024_3	2	4.03
AJW12_14#14	1	CGN18024_1 x CGN18024_3	2	4.81
AJW12_14#14	1	CGN18024_1 x CGN18024_3	2	5.2
AJW12_14#14	1	CGN18024_1 x CGN18024_3	2	5.23
AJW12_14#14	1	CGN18024_1 x CGN18024_3	2	4.64
AJW12_14#14	1	CGN18024_1 x CGN18024_3	2	4.64
AJW12_14#14	1	CGN18024_1 x CGN18024_3	3	4.64
AJW12_14#14	1	CGN18024_1 x CGN18024_3	3	6.52
AJW12_14#14	1	CGN18024_1 x CGN18024_3	3	6.52
AJW12_14#14	1	CGN18024_1 x CGN18024_3	3	5.53
AJW12_14#14	1	CGN18024_1 x CGN18024_3	3	5.95
AJW12_14#14	1	CGN18024_1 x CGN18024_3	3	5.57
AJW12_15#15	1	CGN18024_1 x CGN18024_3	1	0.61
AJW12_15#15	1	CGN18024_1 x CGN18024_3	1	2.28
AJW12_15#15	1	CGN18024_1 x CGN18024_3	1	0.84
AJW12_15#15	1	CGN18024_1 x CGN18024_3	1	0.84
AJW12_15#15	1	CGN18024_1 x CGN18024_3	1	0
AJW12_15#15	1	CGN18024_1 x CGN18024_3	1	0
AJW12_15#15	1	CGN18024_1 x CGN18024_3	2	3.75
AJW12_15#15	1	CGN18024_1 x CGN18024_3	2	3.48
AJW12_15#15	1	CGN18024_1 x CGN18024_3	2	3.28
AJW12_15#15	1	CGN18024_1 x CGN18024_3	2	2.2
AJW12_15#15	1	CGN18024_1 x CGN18024_3	2	0
AJW12_15#15	1	CGN18024_1 x CGN18024_3	2	1.72
AJW12_15#15	1	CGN18024_1 x CGN18024_3	3	1.86
AJW12_15#15	1	CGN18024_1 x CGN18024_3	3	2.3
AJW12_15#15	1	CGN18024_1 x CGN18024_3	3	1.16
AJW12_15#15	1	CGN18024_1 x CGN18024_3	3	0.98
AJW12_15#15	1	CGN18024_1 x CGN18024_3	3	0
AJW12_15#15	1	CGN18024_1 x CGN18024_3	3	0
AJW12_16#16	1	CGN18024_1 x CGN18024_3	1	1.32
AJW12_16#16	1	CGN18024_1 x CGN18024_3	1	1.32
AJW12_16#16	1	CGN18024_1 x CGN18024_3	1	1.83
AJW12_16#16	1	CGN18024_1 x CGN18024_3	1	2.11
AJW12_16#16	1	CGN18024_1 x CGN18024_3	1	2.03
AJW12_16#16	1	CGN18024_1 x CGN18024_3	1	0.77
AJW12_16#16	1	CGN18024_1 x CGN18024_3	2	0.83
AJW12_16#16	1	CGN18024_1 x CGN18024_3	2	2.14
AJW12_16#16	1	CGN18024_1 x CGN18024_3	2	2.65
AJW12_16#16	1	CGN18024_1 x CGN18024_3	2	1.95
AJW12_16#16	1	CGN18024_1 x CGN18024_3	2	1.05
AJW12_16#16	1	CGN18024_1 x CGN18024_3	2	1.05
AJW12_16#16	1	CGN18024_1 x CGN18024_3	3	1.05
AJW12_16#16	1	CGN18024_1 x CGN18024_3	3	2.96
AJW12_16#16	1	CGN18024_1 x CGN18024_3	3	3.09
AJW12_16#16	1	CGN18024_1 x CGN18024_3	3	4.9
AJW12_16#16	1	CGN18024_1 x CGN18024_3	3	3.48
AJW12_16#16	1	CGN18024_1 x CGN18024_3	3	3.16
AJW12_17#17	1	CGN18024_1 x CGN18024_3	1	5.66
AJW12_17#17	1	CGN18024_1 x CGN18024_3	1	6.15
AJW12_17#17	1	CGN18024_1 x CGN18024_3	1	4.67
AJW12_17#17	1	CGN18024_1 x CGN18024_3	1	5.26
AJW12_17#17	1	CGN18024_1 x CGN18024_3	1	5.68
AJW12_17#17	1	CGN18024_1 x CGN18024_3	1	4.83
AJW12_17#17	1	CGN18024_1 x CGN18024_3	2	5.49
AJW12_17#17	1	CGN18024_1 x CGN18024_3	2	5.55
AJW12_17#17	1	CGN18024_1 x CGN18024_3	2	6.33
AJW12_17#17	1	CGN18024_1 x CGN18024_3	2	7.99
AJW12_17#17	1	CGN18024_1 x CGN18024_3	2	7.11
AJW12_17#17	1	CGN18024_1 x CGN18024_3	2	7.05
AJW12_17#17	1	CGN18024_1 x CGN18024_3	3	6.49
AJW12_17#17	1	CGN18024_1 x CGN18024_3	3	4.74
AJW12_17#17	1	CGN18024_1 x CGN18024_3	3	7.22
AJW12_17#17	1	CGN18024_1 x CGN18024_3	3	5.71
AJW12_17#17	1	CGN18024_1 x CGN18024_3	3	5.75
AJW12_17#17	1	CGN18024_1 x CGN18024_3	3	6.33
AJW12_18#18	1	CGN18024_1 x CGN18024_3	1	0
AJW12_18#18	1	CGN18024_1 x CGN18024_3	1	1.54
AJW12_18#18	1	CGN18024_1 x CGN18024_3	1	1.2
AJW12_18#18	1	CGN18024_1 x CGN18024_3	1	1.2
AJW12_18#18	1	CGN18024_1 x CGN18024_3	1	1.2
AJW12_18#18	1	CGN18024_1 x CGN18024_3	1	1.2
AJW12_18#18	1	CGN18024_1 x CGN18024_3	2	3.14
AJW12_18#18	1	CGN18024_1 x CGN18024_3	2	1.27
AJW12_18#18	1	CGN18024_1 x CGN18024_3	2	0
AJW12_18#18	1	CGN18024_1 x CGN18024_3	2	0
AJW12_18#18	1	CGN18024_1 x CGN18024_3	2	0
AJW12_18#18	1	CGN18024_1 x CGN18024_3	2	0
AJW12_18#18	1	CGN18024_1 x CGN18024_3	3	0.5
AJW12_18#18	1	CGN18024_1 x CGN18024_3	3	0.5
AJW12_18#18	1	CGN18024_1 x CGN18024_3	3	0.32
AJW12_18#18	1	CGN18024_1 x CGN18024_3	3	0.32
AJW12_18#18	1	CGN18024_1 x CGN18024_3	3	0
AJW12_18#18	1	CGN18024_1 x CGN18024_3	3	0
AJW12_19#19	1	CGN18024_1 x CGN18024_3	1	4.24
AJW12_19#19	1	CGN18024_1 x CGN18024_3	1	4.68
AJW12_19#19	1	CGN18024_1 x CGN18024_3	1	4.25
AJW12_19#19	1	CGN18024_1 x CGN18024_3	1	4.71
AJW12_19#19	1	CGN18024_1 x CGN18024_3	1	4.71
AJW12_19#19	1	CGN18024_1 x CGN18024_3	1	4.71
AJW12_19#19	1	CGN18024_1 x CGN18024_3	2	5.24
AJW12_19#19	1	CGN18024_1 x CGN18024_3	2	4.43
AJW12_19#19	1	CGN18024_1 x CGN18024_3	2	4.47
AJW12_19#19	1	CGN18024_1 x CGN18024_3	2	4.48
AJW12_19#19	1	CGN18024_1 x CGN18024_3	2	4.56
AJW12_19#19	1	CGN18024_1 x CGN18024_3	2	0
AJW12_19#19	1	CGN18024_1 x CGN18024_3	3	5.27
AJW12_19#19	1	CGN18024_1 x CGN18024_3	3	4.22
AJW12_19#19	1	CGN18024_1 x CGN18024_3	3	4.22
AJW12_19#19	1	CGN18024_1 x CGN18024_3	3	4.79
AJW12_19#19	1	CGN18024_1 x CGN18024_3	3	3.43
AJW12_19#19	1	CGN18024_1 x CGN18024_3	3	0
AJW12_20#20	1	CGN18024_1 x CGN18024_3	1	5.52
AJW12_20#20	1	CGN18024_1 x CGN18024_3	1	6.94
AJW12_20#20	1	CGN18024_1 x CGN18024_3	1	5.98
AJW12_20#20	1	CGN18024_1 x CGN18024_3	1	6.35
AJW12_20#20	1	CGN18024_1 x CGN18024_3	1	7.75
AJW12_20#20	1	CGN18024_1 x CGN18024_3	1	3.33
AJW12_20#20	1	CGN18024_1 x CGN18024_3	2	3.33
AJW12_20#20	1	CGN18024_1 x CGN18024_3	2	5.62
AJW12_20#20	1	CGN18024_1 x CGN18024_3	2	4.98
AJW12_20#20	1	CGN18024_1 x CGN18024_3	2	5.97
AJW12_20#20	1	CGN18024_1 x CGN18024_3	2	4.89
AJW12_20#20	1	CGN18024_1 x CGN18024_3	2	4.89
AJW12_20#20	1	CGN18024_1 x CGN18024_3	3	NA
AJW12_20#20	1	CGN18024_1 x CGN18024_3	3	NA
AJW12_20#20	1	CGN18024_1 x CGN18024_3	3	NA
AJW12_20#20	1	CGN18024_1 x CGN18024_3	3	NA
AJW12_20#20	1	CGN18024_1 x CGN18024_3	3	NA
AJW12_20#20	1	CGN18024_1 x CGN18024_3	3	NA
AJW12_21#21	1	CGN18024_1 x CGN18024_3	1	1.09
AJW12_21#21	1	CGN18024_1 x CGN18024_3	1	1.09
AJW12_21#21	1	CGN18024_1 x CGN18024_3	1	2.48
AJW12_21#21	1	CGN18024_1 x CGN18024_3	1	0.89
AJW12_21#21	1	CGN18024_1 x CGN18024_3	1	0.02
AJW12_21#21	1	CGN18024_1 x CGN18024_3	1	0.01
AJW12_21#21	1	CGN18024_1 x CGN18024_3	2	0.01
AJW12_21#21	1	CGN18024_1 x CGN18024_3	2	0.01
AJW12_21#21	1	CGN18024_1 x CGN18024_3	2	0.01
AJW12_21#21	1	CGN18024_1 x CGN18024_3	2	0
AJW12_21#21	1	CGN18024_1 x CGN18024_3	2	0
AJW12_21#21	1	CGN18024_1 x CGN18024_3	2	0
AJW12_21#21	1	CGN18024_1 x CGN18024_3	3	0
AJW12_21#21	1	CGN18024_1 x CGN18024_3	3	0
AJW12_21#21	1	CGN18024_1 x CGN18024_3	3	0.14
AJW12_21#21	1	CGN18024_1 x CGN18024_3	3	0.15
AJW12_21#21	1	CGN18024_1 x CGN18024_3	3	1.58
AJW12_21#21	1	CGN18024_1 x CGN18024_3	3	0.59
AJW12_22#22	1	CGN18024_1 x CGN18024_3	1	5.17
AJW12_22#22	1	CGN18024_1 x CGN18024_3	1	4.64
AJW12_22#22	1	CGN18024_1 x CGN18024_3	1	5.93
AJW12_22#22	1	CGN18024_1 x CGN18024_3	1	5.51
AJW12_22#22	1	CGN18024_1 x CGN18024_3	1	5.22
AJW12_22#22	1	CGN18024_1 x CGN18024_3	1	5.87
AJW12_22#22	1	CGN18024_1 x CGN18024_3	2	5.69
AJW12_22#22	1	CGN18024_1 x CGN18024_3	2	5.38
AJW12_22#22	1	CGN18024_1 x CGN18024_3	2	6.03
AJW12_22#22	1	CGN18024_1 x CGN18024_3	2	3.34
AJW12_22#22	1	CGN18024_1 x CGN18024_3	2	4.33
AJW12_22#22	1	CGN18024_1 x CGN18024_3	2	6.13
AJW12_22#22	1	CGN18024_1 x CGN18024_3	3	5.99
AJW12_22#22	1	CGN18024_1 x CGN18024_3	3	6.64
AJW12_22#22	1	CGN18024_1 x CGN18024_3	3	8.19
AJW12_22#22	1	CGN18024_1 x CGN18024_3	3	6.24
AJW12_22#22	1	CGN18024_1 x CGN18024_3	3	6.83
AJW12_22#22	1	CGN18024_1 x CGN18024_3	3	5.83
AJW12_23#23	1	CGN18024_1 x CGN18024_3	1	1.46
AJW12_23#23	1	CGN18024_1 x CGN18024_3	1	1.46
AJW12_23#23	1	CGN18024_1 x CGN18024_3	1	0.29
AJW12_23#23	1	CGN18024_1 x CGN18024_3	1	0.29
AJW12_23#23	1	CGN18024_1 x CGN18024_3	1	0
AJW12_23#23	1	CGN18024_1 x CGN18024_3	1	0
AJW12_23#23	1	CGN18024_1 x CGN18024_3	2	2.73
AJW12_23#23	1	CGN18024_1 x CGN18024_3	2	2.74
AJW12_23#23	1	CGN18024_1 x CGN18024_3	2	2.74
AJW12_23#23	1	CGN18024_1 x CGN18024_3	2	2.74
AJW12_23#23	1	CGN18024_1 x CGN18024_3	2	2.74
AJW12_23#23	1	CGN18024_1 x CGN18024_3	2	0
AJW12_23#23	1	CGN18024_1 x CGN18024_3	3	1.73
AJW12_23#23	1	CGN18024_1 x CGN18024_3	3	0.99
AJW12_23#23	1	CGN18024_1 x CGN18024_3	3	1.5
AJW12_23#23	1	CGN18024_1 x CGN18024_3	3	1.5
AJW12_23#23	1	CGN18024_1 x CGN18024_3	3	1.5
AJW12_23#23	1	CGN18024_1 x CGN18024_3	3	1.5
AJW12_24#24	1	CGN18024_1 x CGN18024_3	1	5.85
AJW12_24#24	1	CGN18024_1 x CGN18024_3	1	4.78
AJW12_24#24	1	CGN18024_1 x CGN18024_3	1	6.8
AJW12_24#24	1	CGN18024_1 x CGN18024_3	1	6.55
AJW12_24#24	1	CGN18024_1 x CGN18024_3	1	7.38
AJW12_24#24	1	CGN18024_1 x CGN18024_3	1	8.17
AJW12_24#24	1	CGN18024_1 x CGN18024_3	2	6.6
AJW12_24#24	1	CGN18024_1 x CGN18024_3	2	5.6
AJW12_24#24	1	CGN18024_1 x CGN18024_3	2	6.27
AJW12_24#24	1	CGN18024_1 x CGN18024_3	2	5.64
AJW12_24#24	1	CGN18024_1 x CGN18024_3	2	4.11
AJW12_24#24	1	CGN18024_1 x CGN18024_3	2	4.7
AJW12_24#24	1	CGN18024_1 x CGN18024_3	3	4.7
AJW12_24#24	1	CGN18024_1 x CGN18024_3	3	4.43
AJW12_24#24	1	CGN18024_1 x CGN18024_3	3	5.48
AJW12_24#24	1	CGN18024_1 x CGN18024_3	3	4.82
AJW12_24#24	1	CGN18024_1 x CGN18024_3	3	4.45
AJW12_24#24	1	CGN18024_1 x CGN18024_3	3	3.15
AJW12_25#25	1	CGN18024_1 x CGN18024_3	1	1.96
AJW12_25#25	1	CGN18024_1 x CGN18024_3	1	2.97
AJW12_25#25	1	CGN18024_1 x CGN18024_3	1	0
AJW12_25#25	1	CGN18024_1 x CGN18024_3	1	0
AJW12_25#25	1	CGN18024_1 x CGN18024_3	1	1.57
AJW12_25#25	1	CGN18024_1 x CGN18024_3	1	1.79
AJW12_25#25	1	CGN18024_1 x CGN18024_3	2	0
AJW12_25#25	1	CGN18024_1 x CGN18024_3	2	0.82
AJW12_25#25	1	CGN18024_1 x CGN18024_3	2	0.93
AJW12_25#25	1	CGN18024_1 x CGN18024_3	2	1.31
AJW12_25#25	1	CGN18024_1 x CGN18024_3	2	0
AJW12_25#25	1	CGN18024_1 x CGN18024_3	2	0
AJW12_25#25	1	CGN18024_1 x CGN18024_3	3	2.05
AJW12_25#25	1	CGN18024_1 x CGN18024_3	3	1.4
AJW12_25#25	1	CGN18024_1 x CGN18024_3	3	1.4
AJW12_25#25	1	CGN18024_1 x CGN18024_3	3	0
AJW12_25#25	1	CGN18024_1 x CGN18024_3	3	0
AJW12_25#25	1	CGN18024_1 x CGN18024_3	3	0
AJW12_26#26	1	CGN18024_1 x CGN18024_3	1	1.09
AJW12_26#26	1	CGN18024_1 x CGN18024_3	1	1.09
AJW12_26#26	1	CGN18024_1 x CGN18024_3	1	1.09
AJW12_26#26	1	CGN18024_1 x CGN18024_3	1	0
AJW12_26#26	1	CGN18024_1 x CGN18024_3	1	0
AJW12_26#26	1	CGN18024_1 x CGN18024_3	1	0
AJW12_26#26	1	CGN18024_1 x CGN18024_3	2	0.49
AJW12_26#26	1	CGN18024_1 x CGN18024_3	2	0.49
AJW12_26#26	1	CGN18024_1 x CGN18024_3	2	0
AJW12_26#26	1	CGN18024_1 x CGN18024_3	2	0
AJW12_26#26	1	CGN18024_1 x CGN18024_3	2	0
AJW12_26#26	1	CGN18024_1 x CGN18024_3	2	0
AJW12_26#26	1	CGN18024_1 x CGN18024_3	3	0.73
AJW12_26#26	1	CGN18024_1 x CGN18024_3	3	0.73
AJW12_26#26	1	CGN18024_1 x CGN18024_3	3	0
AJW12_26#26	1	CGN18024_1 x CGN18024_3	3	0
AJW12_26#26	1	CGN18024_1 x CGN18024_3	3	0
AJW12_26#26	1	CGN18024_1 x CGN18024_3	3	0
AJW12_27#27	1	CGN18024_1 x CGN18024_3	1	2.41
AJW12_27#27	1	CGN18024_1 x CGN18024_3	1	3.16
AJW12_27#27	1	CGN18024_1 x CGN18024_3	1	2.09
AJW12_27#27	1	CGN18024_1 x CGN18024_3	1	1.35
AJW12_27#27	1	CGN18024_1 x CGN18024_3	1	2.47
AJW12_27#27	1	CGN18024_1 x CGN18024_3	1	1.29
AJW12_27#27	1	CGN18024_1 x CGN18024_3	2	0
AJW12_27#27	1	CGN18024_1 x CGN18024_3	2	0
AJW12_27#27	1	CGN18024_1 x CGN18024_3	2	1.64
AJW12_27#27	1	CGN18024_1 x CGN18024_3	2	2.32
AJW12_27#27	1	CGN18024_1 x CGN18024_3	2	5.43
AJW12_27#27	1	CGN18024_1 x CGN18024_3	2	1.76
AJW12_27#27	1	CGN18024_1 x CGN18024_3	3	2.87
AJW12_27#27	1	CGN18024_1 x CGN18024_3	3	2.87
AJW12_27#27	1	CGN18024_1 x CGN18024_3	3	2.73
AJW12_27#27	1	CGN18024_1 x CGN18024_3	3	1.9
AJW12_27#27	1	CGN18024_1 x CGN18024_3	3	2.27
AJW12_27#27	1	CGN18024_1 x CGN18024_3	3	0
AJW12_28#28	1	CGN18024_1 x CGN18024_3	1	5.85
AJW12_28#28	1	CGN18024_1 x CGN18024_3	1	6.3
AJW12_28#28	1	CGN18024_1 x CGN18024_3	1	5.32
AJW12_28#28	1	CGN18024_1 x CGN18024_3	1	6.44
AJW12_28#28	1	CGN18024_1 x CGN18024_3	1	6.06
AJW12_28#28	1	CGN18024_1 x CGN18024_3	1	5.34
AJW12_28#28	1	CGN18024_1 x CGN18024_3	2	5.35
AJW12_28#28	1	CGN18024_1 x CGN18024_3	2	6.03
AJW12_28#28	1	CGN18024_1 x CGN18024_3	2	3.59
AJW12_28#28	1	CGN18024_1 x CGN18024_3	2	4.35
AJW12_28#28	1	CGN18024_1 x CGN18024_3	2	4.1
AJW12_28#28	1	CGN18024_1 x CGN18024_3	2	4.1
AJW12_28#28	1	CGN18024_1 x CGN18024_3	3	4.14
AJW12_28#28	1	CGN18024_1 x CGN18024_3	3	6.3
AJW12_28#28	1	CGN18024_1 x CGN18024_3	3	6.03
AJW12_28#28	1	CGN18024_1 x CGN18024_3	3	8.25
AJW12_28#28	1	CGN18024_1 x CGN18024_3	3	8.66
AJW12_28#28	1	CGN18024_1 x CGN18024_3	3	9.16
AJW12_29#29	1	CGN18024_1 x CGN18024_3	1	2.25
AJW12_29#29	1	CGN18024_1 x CGN18024_3	1	0.8
AJW12_29#29	1	CGN18024_1 x CGN18024_3	1	0.8
AJW12_29#29	1	CGN18024_1 x CGN18024_3	1	1.71
AJW12_29#29	1	CGN18024_1 x CGN18024_3	1	1.23
AJW12_29#29	1	CGN18024_1 x CGN18024_3	1	1.23
AJW12_29#29	1	CGN18024_1 x CGN18024_3	2	2.42
AJW12_29#29	1	CGN18024_1 x CGN18024_3	2	1.41
AJW12_29#29	1	CGN18024_1 x CGN18024_3	2	1.71
AJW12_29#29	1	CGN18024_1 x CGN18024_3	2	2.4
AJW12_29#29	1	CGN18024_1 x CGN18024_3	2	4.17
AJW12_29#29	1	CGN18024_1 x CGN18024_3	2	2.21
AJW12_29#29	1	CGN18024_1 x CGN18024_3	3	3.7
AJW12_29#29	1	CGN18024_1 x CGN18024_3	3	3.16
AJW12_29#29	1	CGN18024_1 x CGN18024_3	3	3.16
AJW12_29#29	1	CGN18024_1 x CGN18024_3	3	3.16
AJW12_29#29	1	CGN18024_1 x CGN18024_3	3	0
AJW12_29#29	1	CGN18024_1 x CGN18024_3	3	1.35
AJW12_30#30	1	CGN18024_1 x CGN18024_3	1	0.77
AJW12_30#30	1	CGN18024_1 x CGN18024_3	1	0.77
AJW12_30#30	1	CGN18024_1 x CGN18024_3	1	0.77
AJW12_30#30	1	CGN18024_1 x CGN18024_3	1	1.86
AJW12_30#30	1	CGN18024_1 x CGN18024_3	1	0.62
AJW12_30#30	1	CGN18024_1 x CGN18024_3	1	0.62
AJW12_30#30	1	CGN18024_1 x CGN18024_3	2	0
AJW12_30#30	1	CGN18024_1 x CGN18024_3	2	0
AJW12_30#30	1	CGN18024_1 x CGN18024_3	2	0.83
AJW12_30#30	1	CGN18024_1 x CGN18024_3	2	0.83
AJW12_30#30	1	CGN18024_1 x CGN18024_3	2	0.83
AJW12_30#30	1	CGN18024_1 x CGN18024_3	2	0
AJW12_30#30	1	CGN18024_1 x CGN18024_3	3	0.95
AJW12_30#30	1	CGN18024_1 x CGN18024_3	3	0.95
AJW12_30#30	1	CGN18024_1 x CGN18024_3	3	0.95
AJW12_30#30	1	CGN18024_1 x CGN18024_3	3	0.94
AJW12_30#30	1	CGN18024_1 x CGN18024_3	3	0
AJW12_30#30	1	CGN18024_1 x CGN18024_3	3	0
AJW12_5#5	2	CGN18024_1 x CGN18024_3	1	0.75
AJW12_5#5	2	CGN18024_1 x CGN18024_3	1	0.75
AJW12_5#5	2	CGN18024_1 x CGN18024_3	1	1.33
AJW12_5#5	2	CGN18024_1 x CGN18024_3	1	1.33
AJW12_5#5	2	CGN18024_1 x CGN18024_3	1	1.33
AJW12_5#5	2	CGN18024_1 x CGN18024_3	1	0.73
AJW12_5#5	2	CGN18024_1 x CGN18024_3	2	1.11
AJW12_5#5	2	CGN18024_1 x CGN18024_3	2	1.11
AJW12_5#5	2	CGN18024_1 x CGN18024_3	2	1.11
AJW12_5#5	2	CGN18024_1 x CGN18024_3	2	1.11
AJW12_5#5	2	CGN18024_1 x CGN18024_3	2	1.11
AJW12_5#5	2	CGN18024_1 x CGN18024_3	2	1.11
AJW12_5#5	2	CGN18024_1 x CGN18024_3	3	1.11
AJW12_5#5	2	CGN18024_1 x CGN18024_3	3	1.11
AJW12_5#5	2	CGN18024_1 x CGN18024_3	3	1.11
AJW12_5#5	2	CGN18024_1 x CGN18024_3	3	1.11
AJW12_5#5	2	CGN18024_1 x CGN18024_3	3	1.11
AJW12_5#5	2	CGN18024_1 x CGN18024_3	3	1.11
AJW12_26#26	2	CGN18024_1 x CGN18024_3	1	0
AJW12_26#26	2	CGN18024_1 x CGN18024_3	1	0
AJW12_26#26	2	CGN18024_1 x CGN18024_3	1	0
AJW12_26#26	2	CGN18024_1 x CGN18024_3	1	0
AJW12_26#26	2	CGN18024_1 x CGN18024_3	1	0
AJW12_26#26	2	CGN18024_1 x CGN18024_3	1	0
AJW12_26#26	2	CGN18024_1 x CGN18024_3	2	0
AJW12_26#26	2	CGN18024_1 x CGN18024_3	2	0
AJW12_26#26	2	CGN18024_1 x CGN18024_3	2	0
AJW12_26#26	2	CGN18024_1 x CGN18024_3	2	0.21
AJW12_26#26	2	CGN18024_1 x CGN18024_3	2	0.21
AJW12_26#26	2	CGN18024_1 x CGN18024_3	2	0.21
AJW12_26#26	2	CGN18024_1 x CGN18024_3	3	0
AJW12_26#26	2	CGN18024_1 x CGN18024_3	3	0
AJW12_26#26	2	CGN18024_1 x CGN18024_3	3	0.42
AJW12_26#26	2	CGN18024_1 x CGN18024_3	3	0.42
AJW12_26#26	2	CGN18024_1 x CGN18024_3	3	0.43
AJW12_26#26	2	CGN18024_1 x CGN18024_3	3	0
AJW12_6#6	2	CGN18024_1 x CGN18024_3	1	4.82
AJW12_6#6	2	CGN18024_1 x CGN18024_3	1	5.58
AJW12_6#6	2	CGN18024_1 x CGN18024_3	1	5.22
AJW12_6#6	2	CGN18024_1 x CGN18024_3	1	5.35
AJW12_6#6	2	CGN18024_1 x CGN18024_3	1	5.73
AJW12_6#6	2	CGN18024_1 x CGN18024_3	1	4.95
AJW12_6#6	2	CGN18024_1 x CGN18024_3	2	6.38
AJW12_6#6	2	CGN18024_1 x CGN18024_3	2	6.14
AJW12_6#6	2	CGN18024_1 x CGN18024_3	2	6.63
AJW12_6#6	2	CGN18024_1 x CGN18024_3	2	4.7
AJW12_6#6	2	CGN18024_1 x CGN18024_3	2	5.41
AJW12_6#6	2	CGN18024_1 x CGN18024_3	2	3.17
AJW12_6#6	2	CGN18024_1 x CGN18024_3	3	4.57
AJW12_6#6	2	CGN18024_1 x CGN18024_3	3	5.63
AJW12_6#6	2	CGN18024_1 x CGN18024_3	3	7.34
AJW12_6#6	2	CGN18024_1 x CGN18024_3	3	5.97
AJW12_6#6	2	CGN18024_1 x CGN18024_3	3	5.76
AJW12_6#6	2	CGN18024_1 x CGN18024_3	3	5.51
AJW12_24#24	2	CGN18024_1 x CGN18024_3	1	3.93
AJW12_24#24	2	CGN18024_1 x CGN18024_3	1	4.1
AJW12_24#24	2	CGN18024_1 x CGN18024_3	1	5.1
AJW12_24#24	2	CGN18024_1 x CGN18024_3	1	5.23
AJW12_24#24	2	CGN18024_1 x CGN18024_3	1	4.85
AJW12_24#24	2	CGN18024_1 x CGN18024_3	1	5.19
AJW12_24#24	2	CGN18024_1 x CGN18024_3	2	5.56
AJW12_24#24	2	CGN18024_1 x CGN18024_3	2	6.99
AJW12_24#24	2	CGN18024_1 x CGN18024_3	2	5.64
AJW12_24#24	2	CGN18024_1 x CGN18024_3	2	5.64
AJW12_24#24	2	CGN18024_1 x CGN18024_3	2	6.55
AJW12_24#24	2	CGN18024_1 x CGN18024_3	2	4.71
AJW12_24#24	2	CGN18024_1 x CGN18024_3	3	4.71
AJW12_24#24	2	CGN18024_1 x CGN18024_3	3	4.89
AJW12_24#24	2	CGN18024_1 x CGN18024_3	3	5.77
AJW12_24#24	2	CGN18024_1 x CGN18024_3	3	5.67
AJW12_24#24	2	CGN18024_1 x CGN18024_3	3	5.87
AJW12_24#24	2	CGN18024_1 x CGN18024_3	3	5.52
AJW12_10#10	2	CGN18024_1 x CGN18024_3	1	6.37
AJW12_10#10	2	CGN18024_1 x CGN18024_3	1	6.14
AJW12_10#10	2	CGN18024_1 x CGN18024_3	1	6.78
AJW12_10#10	2	CGN18024_1 x CGN18024_3	1	5.96
AJW12_10#10	2	CGN18024_1 x CGN18024_3	1	5.94
AJW12_10#10	2	CGN18024_1 x CGN18024_3	1	5.45
AJW12_10#10	2	CGN18024_1 x CGN18024_3	2	6.7
AJW12_10#10	2	CGN18024_1 x CGN18024_3	2	5.19
AJW12_10#10	2	CGN18024_1 x CGN18024_3	2	5.86
AJW12_10#10	2	CGN18024_1 x CGN18024_3	2	5.86
AJW12_10#10	2	CGN18024_1 x CGN18024_3	2	5.01
AJW12_10#10	2	CGN18024_1 x CGN18024_3	2	6.11
AJW12_10#10	2	CGN18024_1 x CGN18024_3	3	6.11
AJW12_10#10	2	CGN18024_1 x CGN18024_3	3	5.57
AJW12_10#10	2	CGN18024_1 x CGN18024_3	3	5.92
AJW12_10#10	2	CGN18024_1 x CGN18024_3	3	6.92
AJW12_10#10	2	CGN18024_1 x CGN18024_3	3	5.28
AJW12_10#10	2	CGN18024_1 x CGN18024_3	3	5.1
AJW12_11#11	2	CGN18024_1 x CGN18024_3	1	5.75
AJW12_11#11	2	CGN18024_1 x CGN18024_3	1	4.74
AJW12_11#11	2	CGN18024_1 x CGN18024_3	1	5.31
AJW12_11#11	2	CGN18024_1 x CGN18024_3	1	5.66
AJW12_11#11	2	CGN18024_1 x CGN18024_3	1	6.54
AJW12_11#11	2	CGN18024_1 x CGN18024_3	1	6.2
AJW12_11#11	2	CGN18024_1 x CGN18024_3	2	5.39
AJW12_11#11	2	CGN18024_1 x CGN18024_3	2	5.39
AJW12_11#11	2	CGN18024_1 x CGN18024_3	2	6.06
AJW12_11#11	2	CGN18024_1 x CGN18024_3	2	6.54
AJW12_11#11	2	CGN18024_1 x CGN18024_3	2	1.48
AJW12_11#11	2	CGN18024_1 x CGN18024_3	2	4.32
AJW12_11#11	2	CGN18024_1 x CGN18024_3	3	5.89
AJW12_11#11	2	CGN18024_1 x CGN18024_3	3	5.89
AJW12_11#11	2	CGN18024_1 x CGN18024_3	3	6.34
AJW12_11#11	2	CGN18024_1 x CGN18024_3	3	6.34
AJW12_11#11	2	CGN18024_1 x CGN18024_3	3	6.34
AJW12_11#11	2	CGN18024_1 x CGN18024_3	3	7.14
AJW12_3#3	2	CGN18024_1 x CGN18024_3	1	0.76
AJW12_3#3	2	CGN18024_1 x CGN18024_3	1	0.76
AJW12_3#3	2	CGN18024_1 x CGN18024_3	1	0.76
AJW12_3#3	2	CGN18024_1 x CGN18024_3	1	0
AJW12_3#3	2	CGN18024_1 x CGN18024_3	1	0
AJW12_3#3	2	CGN18024_1 x CGN18024_3	1	0
AJW12_3#3	2	CGN18024_1 x CGN18024_3	2	1.09
AJW12_3#3	2	CGN18024_1 x CGN18024_3	2	1.09
AJW12_3#3	2	CGN18024_1 x CGN18024_3	2	0
AJW12_3#3	2	CGN18024_1 x CGN18024_3	2	0
AJW12_3#3	2	CGN18024_1 x CGN18024_3	2	0
AJW12_3#3	2	CGN18024_1 x CGN18024_3	2	0
AJW12_3#3	2	CGN18024_1 x CGN18024_3	3	1.81
AJW12_3#3	2	CGN18024_1 x CGN18024_3	3	0.79
AJW12_3#3	2	CGN18024_1 x CGN18024_3	3	1.68
AJW12_3#3	2	CGN18024_1 x CGN18024_3	3	1.68
AJW12_3#3	2	CGN18024_1 x CGN18024_3	3	0
AJW12_3#3	2	CGN18024_1 x CGN18024_3	3	0
AJW12_8#8	2	CGN18024_1 x CGN18024_3	1	0.3
AJW12_8#8	2	CGN18024_1 x CGN18024_3	1	0.3
AJW12_8#8	2	CGN18024_1 x CGN18024_3	1	0
AJW12_8#8	2	CGN18024_1 x CGN18024_3	1	0
AJW12_8#8	2	CGN18024_1 x CGN18024_3	1	0
AJW12_8#8	2	CGN18024_1 x CGN18024_3	1	0
AJW12_8#8	2	CGN18024_1 x CGN18024_3	2	1.44
AJW12_8#8	2	CGN18024_1 x CGN18024_3	2	1.44
AJW12_8#8	2	CGN18024_1 x CGN18024_3	2	2.4
AJW12_8#8	2	CGN18024_1 x CGN18024_3	2	1.14
AJW12_8#8	2	CGN18024_1 x CGN18024_3	2	1.14
AJW12_8#8	2	CGN18024_1 x CGN18024_3	2	0
AJW12_8#8	2	CGN18024_1 x CGN18024_3	3	1.14
AJW12_8#8	2	CGN18024_1 x CGN18024_3	3	1.14
AJW12_8#8	2	CGN18024_1 x CGN18024_3	3	0
AJW12_8#8	2	CGN18024_1 x CGN18024_3	3	0
AJW12_8#8	2	CGN18024_1 x CGN18024_3	3	0
AJW12_8#8	2	CGN18024_1 x CGN18024_3	3	0
AJW12_29#29	2	CGN18024_1 x CGN18024_3	1	1.19
AJW12_29#29	2	CGN18024_1 x CGN18024_3	1	1.2
AJW12_29#29	2	CGN18024_1 x CGN18024_3	1	1.93
AJW12_29#29	2	CGN18024_1 x CGN18024_3	1	0.82
AJW12_29#29	2	CGN18024_1 x CGN18024_3	1	0.58
AJW12_29#29	2	CGN18024_1 x CGN18024_3	1	0.58
AJW12_29#29	2	CGN18024_1 x CGN18024_3	2	0
AJW12_29#29	2	CGN18024_1 x CGN18024_3	2	0
AJW12_29#29	2	CGN18024_1 x CGN18024_3	2	0.9
AJW12_29#29	2	CGN18024_1 x CGN18024_3	2	0.9
AJW12_29#29	2	CGN18024_1 x CGN18024_3	2	1.6
AJW12_29#29	2	CGN18024_1 x CGN18024_3	2	0
AJW12_29#29	2	CGN18024_1 x CGN18024_3	3	1.53
AJW12_29#29	2	CGN18024_1 x CGN18024_3	3	2.74
AJW12_29#29	2	CGN18024_1 x CGN18024_3	3	2.15
AJW12_29#29	2	CGN18024_1 x CGN18024_3	3	0.22
AJW12_29#29	2	CGN18024_1 x CGN18024_3	3	0.22
AJW12_29#29	2	CGN18024_1 x CGN18024_3	3	0
CGN18024_3	2	NA	1	2.5
CGN18024_3	2	NA	1	2.5
CGN18024_3	2	NA	1	2.5
CGN18024_3	2	NA	1	5.92
CGN18024_3	2	NA	1	5.47
CGN18024_3	2	NA	1	4.06
CGN18024_3	2	NA	2	5.81
CGN18024_3	2	NA	2	5.37
CGN18024_3	2	NA	2	6.66
CGN18024_3	2	NA	2	6.55
CGN18024_3	2	NA	2	5.14
CGN18024_3	2	NA	2	5.67
CGN18024_3	2	NA	3	5.67
CGN18024_3	2	NA	3	5.67
CGN18024_3	2	NA	3	4.98
CGN18024_3	2	NA	3	4.98
CGN18024_3	2	NA	3	5.44
CGN18024_3	2	NA	3	5.02
AJW12_23#23	2	CGN18024_1 x CGN18024_3	1	0
AJW12_23#23	2	CGN18024_1 x CGN18024_3	1	0
AJW12_23#23	2	CGN18024_1 x CGN18024_3	1	0
AJW12_23#23	2	CGN18024_1 x CGN18024_3	1	0
AJW12_23#23	2	CGN18024_1 x CGN18024_3	1	0
AJW12_23#23	2	CGN18024_1 x CGN18024_3	1	0
AJW12_23#23	2	CGN18024_1 x CGN18024_3	2	1.08
AJW12_23#23	2	CGN18024_1 x CGN18024_3	2	1.08
AJW12_23#23	2	CGN18024_1 x CGN18024_3	2	0
AJW12_23#23	2	CGN18024_1 x CGN18024_3	2	0
AJW12_23#23	2	CGN18024_1 x CGN18024_3	2	0
AJW12_23#23	2	CGN18024_1 x CGN18024_3	2	0
AJW12_23#23	2	CGN18024_1 x CGN18024_3	3	0.61
AJW12_23#23	2	CGN18024_1 x CGN18024_3	3	0.62
AJW12_23#23	2	CGN18024_1 x CGN18024_3	3	0
AJW12_23#23	2	CGN18024_1 x CGN18024_3	3	0
AJW12_23#23	2	CGN18024_1 x CGN18024_3	3	0
AJW12_23#23	2	CGN18024_1 x CGN18024_3	3	0
AJW12_27#27	2	CGN18024_1 x CGN18024_3	1	1.35
AJW12_27#27	2	CGN18024_1 x CGN18024_3	1	2.17
AJW12_27#27	2	CGN18024_1 x CGN18024_3	1	1.56
AJW12_27#27	2	CGN18024_1 x CGN18024_3	1	0.48
AJW12_27#27	2	CGN18024_1 x CGN18024_3	1	0
AJW12_27#27	2	CGN18024_1 x CGN18024_3	1	0
AJW12_27#27	2	CGN18024_1 x CGN18024_3	2	0
AJW12_27#27	2	CGN18024_1 x CGN18024_3	2	0
AJW12_27#27	2	CGN18024_1 x CGN18024_3	2	0.97
AJW12_27#27	2	CGN18024_1 x CGN18024_3	2	0.97
AJW12_27#27	2	CGN18024_1 x CGN18024_3	2	1.63
AJW12_27#27	2	CGN18024_1 x CGN18024_3	2	0
AJW12_27#27	2	CGN18024_1 x CGN18024_3	3	2.01
AJW12_27#27	2	CGN18024_1 x CGN18024_3	3	1.26
AJW12_27#27	2	CGN18024_1 x CGN18024_3	3	0
AJW12_27#27	2	CGN18024_1 x CGN18024_3	3	2.31
AJW12_27#27	2	CGN18024_1 x CGN18024_3	3	0.32
AJW12_27#27	2	CGN18024_1 x CGN18024_3	3	0
AJW12_17#17	2	CGN18024_1 x CGN18024_3	1	6.98
AJW12_17#17	2	CGN18024_1 x CGN18024_3	1	9.27
AJW12_17#17	2	CGN18024_1 x CGN18024_3	1	6.04
AJW12_17#17	2	CGN18024_1 x CGN18024_3	1	7.48
AJW12_17#17	2	CGN18024_1 x CGN18024_3	1	6.28
AJW12_17#17	2	CGN18024_1 x CGN18024_3	1	5.13
AJW12_17#17	2	CGN18024_1 x CGN18024_3	2	5.13
AJW12_17#17	2	CGN18024_1 x CGN18024_3	2	5.13
AJW12_17#17	2	CGN18024_1 x CGN18024_3	2	5.79
AJW12_17#17	2	CGN18024_1 x CGN18024_3	2	4.51
AJW12_17#17	2	CGN18024_1 x CGN18024_3	2	4.32
AJW12_17#17	2	CGN18024_1 x CGN18024_3	2	5.76
AJW12_17#17	2	CGN18024_1 x CGN18024_3	3	5.28
AJW12_17#17	2	CGN18024_1 x CGN18024_3	3	5.61
AJW12_17#17	2	CGN18024_1 x CGN18024_3	3	5.73
AJW12_17#17	2	CGN18024_1 x CGN18024_3	3	5.73
AJW12_17#17	2	CGN18024_1 x CGN18024_3	3	4.99
AJW12_17#17	2	CGN18024_1 x CGN18024_3	3	4.99
AJW12_22#22	2	CGN18024_1 x CGN18024_3	1	4.44
AJW12_22#22	2	CGN18024_1 x CGN18024_3	1	4.44
AJW12_22#22	2	CGN18024_1 x CGN18024_3	1	2.91
AJW12_22#22	2	CGN18024_1 x CGN18024_3	1	3.61
AJW12_22#22	2	CGN18024_1 x CGN18024_3	1	4.71
AJW12_22#22	2	CGN18024_1 x CGN18024_3	1	3.41
AJW12_22#22	2	CGN18024_1 x CGN18024_3	2	4.53
AJW12_22#22	2	CGN18024_1 x CGN18024_3	2	5.64
AJW12_22#22	2	CGN18024_1 x CGN18024_3	2	5.64
AJW12_22#22	2	CGN18024_1 x CGN18024_3	2	5.64
AJW12_22#22	2	CGN18024_1 x CGN18024_3	2	5.47
AJW12_22#22	2	CGN18024_1 x CGN18024_3	2	4.44
AJW12_22#22	2	CGN18024_1 x CGN18024_3	3	3.46
AJW12_22#22	2	CGN18024_1 x CGN18024_3	3	3.46
AJW12_22#22	2	CGN18024_1 x CGN18024_3	3	4.31
AJW12_22#22	2	CGN18024_1 x CGN18024_3	3	5.13
AJW12_22#22	2	CGN18024_1 x CGN18024_3	3	5.1
AJW12_22#22	2	CGN18024_1 x CGN18024_3	3	5.1
AJW12_19#19	2	CGN18024_1 x CGN18024_3	1	4.69
AJW12_19#19	2	CGN18024_1 x CGN18024_3	1	4.04
AJW12_19#19	2	CGN18024_1 x CGN18024_3	1	4.68
AJW12_19#19	2	CGN18024_1 x CGN18024_3	1	4.49
AJW12_19#19	2	CGN18024_1 x CGN18024_3	1	5.43
AJW12_19#19	2	CGN18024_1 x CGN18024_3	1	4.34
AJW12_19#19	2	CGN18024_1 x CGN18024_3	2	3.62
AJW12_19#19	2	CGN18024_1 x CGN18024_3	2	4.01
AJW12_19#19	2	CGN18024_1 x CGN18024_3	2	5.1
AJW12_19#19	2	CGN18024_1 x CGN18024_3	2	4.46
AJW12_19#19	2	CGN18024_1 x CGN18024_3	2	5.21
AJW12_19#19	2	CGN18024_1 x CGN18024_3	2	3.25
AJW12_19#19	2	CGN18024_1 x CGN18024_3	3	3.04
AJW12_19#19	2	CGN18024_1 x CGN18024_3	3	4.45
AJW12_19#19	2	CGN18024_1 x CGN18024_3	3	4.34
AJW12_19#19	2	CGN18024_1 x CGN18024_3	3	4.9
AJW12_19#19	2	CGN18024_1 x CGN18024_3	3	3.79
AJW12_19#19	2	CGN18024_1 x CGN18024_3	3	4.8
AJW12_2#2	2	CGN18024_1 x CGN18024_3	1	1.68
AJW12_2#2	2	CGN18024_1 x CGN18024_3	1	1.03
AJW12_2#2	2	CGN18024_1 x CGN18024_3	1	2.1
AJW12_2#2	2	CGN18024_1 x CGN18024_3	1	0
AJW12_2#2	2	CGN18024_1 x CGN18024_3	1	0
AJW12_2#2	2	CGN18024_1 x CGN18024_3	1	0
AJW12_2#2	2	CGN18024_1 x CGN18024_3	2	1.32
AJW12_2#2	2	CGN18024_1 x CGN18024_3	2	0.79
AJW12_2#2	2	CGN18024_1 x CGN18024_3	2	0.79
AJW12_2#2	2	CGN18024_1 x CGN18024_3	2	0.79
AJW12_2#2	2	CGN18024_1 x CGN18024_3	2	0.79
AJW12_2#2	2	CGN18024_1 x CGN18024_3	2	0
AJW12_2#2	2	CGN18024_1 x CGN18024_3	3	1.58
AJW12_2#2	2	CGN18024_1 x CGN18024_3	3	2.8
AJW12_2#2	2	CGN18024_1 x CGN18024_3	3	2.68
AJW12_2#2	2	CGN18024_1 x CGN18024_3	3	2.6
AJW12_2#2	2	CGN18024_1 x CGN18024_3	3	0
AJW12_2#2	2	CGN18024_1 x CGN18024_3	3	0
AJW12_21#21	2	CGN18024_1 x CGN18024_3	1	NA
AJW12_21#21	2	CGN18024_1 x CGN18024_3	1	NA
AJW12_21#21	2	CGN18024_1 x CGN18024_3	1	NA
AJW12_21#21	2	CGN18024_1 x CGN18024_3	1	NA
AJW12_21#21	2	CGN18024_1 x CGN18024_3	1	NA
AJW12_21#21	2	CGN18024_1 x CGN18024_3	1	NA
AJW12_21#21	2	CGN18024_1 x CGN18024_3	2	NA
AJW12_21#21	2	CGN18024_1 x CGN18024_3	2	NA
AJW12_21#21	2	CGN18024_1 x CGN18024_3	2	NA
AJW12_21#21	2	CGN18024_1 x CGN18024_3	2	NA
AJW12_21#21	2	CGN18024_1 x CGN18024_3	2	NA
AJW12_21#21	2	CGN18024_1 x CGN18024_3	2	NA
AJW12_21#21	2	CGN18024_1 x CGN18024_3	3	NA
AJW12_21#21	2	CGN18024_1 x CGN18024_3	3	NA
AJW12_21#21	2	CGN18024_1 x CGN18024_3	3	NA
AJW12_21#21	2	CGN18024_1 x CGN18024_3	3	NA
AJW12_21#21	2	CGN18024_1 x CGN18024_3	3	NA
AJW12_21#21	2	CGN18024_1 x CGN18024_3	3	NA
AJW12_25#25	2	CGN18024_1 x CGN18024_3	1	0
AJW12_25#25	2	CGN18024_1 x CGN18024_3	1	0
AJW12_25#25	2	CGN18024_1 x CGN18024_3	1	0
AJW12_25#25	2	CGN18024_1 x CGN18024_3	1	0
AJW12_25#25	2	CGN18024_1 x CGN18024_3	1	0
AJW12_25#25	2	CGN18024_1 x CGN18024_3	1	0
AJW12_25#25	2	CGN18024_1 x CGN18024_3	2	0
AJW12_25#25	2	CGN18024_1 x CGN18024_3	2	0
AJW12_25#25	2	CGN18024_1 x CGN18024_3	2	0
AJW12_25#25	2	CGN18024_1 x CGN18024_3	2	0
AJW12_25#25	2	CGN18024_1 x CGN18024_3	2	0
AJW12_25#25	2	CGN18024_1 x CGN18024_3	2	0
AJW12_25#25	2	CGN18024_1 x CGN18024_3	3	0
AJW12_25#25	2	CGN18024_1 x CGN18024_3	3	0
AJW12_25#25	2	CGN18024_1 x CGN18024_3	3	0
AJW12_25#25	2	CGN18024_1 x CGN18024_3	3	0
AJW12_25#25	2	CGN18024_1 x CGN18024_3	3	0
AJW12_25#25	2	CGN18024_1 x CGN18024_3	3	0
AJW12_15#15	2	CGN18024_1 x CGN18024_3	1	0.32
AJW12_15#15	2	CGN18024_1 x CGN18024_3	1	0.32
AJW12_15#15	2	CGN18024_1 x CGN18024_3	1	0.32
AJW12_15#15	2	CGN18024_1 x CGN18024_3	1	0
AJW12_15#15	2	CGN18024_1 x CGN18024_3	1	0
AJW12_15#15	2	CGN18024_1 x CGN18024_3	1	0
AJW12_15#15	2	CGN18024_1 x CGN18024_3	2	0
AJW12_15#15	2	CGN18024_1 x CGN18024_3	2	0
AJW12_15#15	2	CGN18024_1 x CGN18024_3	2	0
AJW12_15#15	2	CGN18024_1 x CGN18024_3	2	0
AJW12_15#15	2	CGN18024_1 x CGN18024_3	2	0
AJW12_15#15	2	CGN18024_1 x CGN18024_3	2	0
AJW12_15#15	2	CGN18024_1 x CGN18024_3	3	1.94
AJW12_15#15	2	CGN18024_1 x CGN18024_3	3	0.94
AJW12_15#15	2	CGN18024_1 x CGN18024_3	3	0.94
AJW12_15#15	2	CGN18024_1 x CGN18024_3	3	0
AJW12_15#15	2	CGN18024_1 x CGN18024_3	3	0
AJW12_15#15	2	CGN18024_1 x CGN18024_3	3	0
AJW12_1#1	2	CGN18024_1 x CGN18024_3	1	2.89
AJW12_1#1	2	CGN18024_1 x CGN18024_3	1	5.71
AJW12_1#1	2	CGN18024_1 x CGN18024_3	1	6.34
AJW12_1#1	2	CGN18024_1 x CGN18024_3	1	4.51
AJW12_1#1	2	CGN18024_1 x CGN18024_3	1	5.31
AJW12_1#1	2	CGN18024_1 x CGN18024_3	1	5.51
AJW12_1#1	2	CGN18024_1 x CGN18024_3	2	5.86
AJW12_1#1	2	CGN18024_1 x CGN18024_3	2	5.44
AJW12_1#1	2	CGN18024_1 x CGN18024_3	2	5.86
AJW12_1#1	2	CGN18024_1 x CGN18024_3	2	5.42
AJW12_1#1	2	CGN18024_1 x CGN18024_3	2	7.12
AJW12_1#1	2	CGN18024_1 x CGN18024_3	2	7.01
AJW12_1#1	2	CGN18024_1 x CGN18024_3	3	7.01
AJW12_1#1	2	CGN18024_1 x CGN18024_3	3	6.2
AJW12_1#1	2	CGN18024_1 x CGN18024_3	3	6.17
AJW12_1#1	2	CGN18024_1 x CGN18024_3	3	3.11
AJW12_1#1	2	CGN18024_1 x CGN18024_3	3	5.06
AJW12_1#1	2	CGN18024_1 x CGN18024_3	3	5.66
AJW12_16#16	2	CGN18024_1 x CGN18024_3	1	0
AJW12_16#16	2	CGN18024_1 x CGN18024_3	1	0
AJW12_16#16	2	CGN18024_1 x CGN18024_3	1	0
AJW12_16#16	2	CGN18024_1 x CGN18024_3	1	0
AJW12_16#16	2	CGN18024_1 x CGN18024_3	1	0
AJW12_16#16	2	CGN18024_1 x CGN18024_3	1	0
AJW12_16#16	2	CGN18024_1 x CGN18024_3	2	0
AJW12_16#16	2	CGN18024_1 x CGN18024_3	2	0
AJW12_16#16	2	CGN18024_1 x CGN18024_3	2	0
AJW12_16#16	2	CGN18024_1 x CGN18024_3	2	0
AJW12_16#16	2	CGN18024_1 x CGN18024_3	2	0
AJW12_16#16	2	CGN18024_1 x CGN18024_3	2	0
AJW12_16#16	2	CGN18024_1 x CGN18024_3	3	0
AJW12_16#16	2	CGN18024_1 x CGN18024_3	3	0
AJW12_16#16	2	CGN18024_1 x CGN18024_3	3	0.14
AJW12_16#16	2	CGN18024_1 x CGN18024_3	3	0.14
AJW12_16#16	2	CGN18024_1 x CGN18024_3	3	0.14
AJW12_16#16	2	CGN18024_1 x CGN18024_3	3	0
AJW12_14#14	2	CGN18024_1 x CGN18024_3	1	7.42
AJW12_14#14	2	CGN18024_1 x CGN18024_3	1	6.38
AJW12_14#14	2	CGN18024_1 x CGN18024_3	1	7.34
AJW12_14#14	2	CGN18024_1 x CGN18024_3	1	6.1
AJW12_14#14	2	CGN18024_1 x CGN18024_3	1	6.1
AJW12_14#14	2	CGN18024_1 x CGN18024_3	1	6.17
AJW12_14#14	2	CGN18024_1 x CGN18024_3	2	5.75
AJW12_14#14	2	CGN18024_1 x CGN18024_3	2	4.94
AJW12_14#14	2	CGN18024_1 x CGN18024_3	2	6.19
AJW12_14#14	2	CGN18024_1 x CGN18024_3	2	6.19
AJW12_14#14	2	CGN18024_1 x CGN18024_3	2	3.05
AJW12_14#14	2	CGN18024_1 x CGN18024_3	2	6.55
AJW12_14#14	2	CGN18024_1 x CGN18024_3	3	5.24
AJW12_14#14	2	CGN18024_1 x CGN18024_3	3	5.79
AJW12_14#14	2	CGN18024_1 x CGN18024_3	3	5.54
AJW12_14#14	2	CGN18024_1 x CGN18024_3	3	5.1
AJW12_14#14	2	CGN18024_1 x CGN18024_3	3	5.1
AJW12_14#14	2	CGN18024_1 x CGN18024_3	3	5.1
AJW12_12#12	2	CGN18024_1 x CGN18024_3	1	0
AJW12_12#12	2	CGN18024_1 x CGN18024_3	1	0
AJW12_12#12	2	CGN18024_1 x CGN18024_3	1	0
AJW12_12#12	2	CGN18024_1 x CGN18024_3	1	0
AJW12_12#12	2	CGN18024_1 x CGN18024_3	1	0
AJW12_12#12	2	CGN18024_1 x CGN18024_3	1	0
AJW12_12#12	2	CGN18024_1 x CGN18024_3	2	0
AJW12_12#12	2	CGN18024_1 x CGN18024_3	2	0
AJW12_12#12	2	CGN18024_1 x CGN18024_3	2	0
AJW12_12#12	2	CGN18024_1 x CGN18024_3	2	0
AJW12_12#12	2	CGN18024_1 x CGN18024_3	2	0
AJW12_12#12	2	CGN18024_1 x CGN18024_3	2	0
AJW12_12#12	2	CGN18024_1 x CGN18024_3	3	0
AJW12_12#12	2	CGN18024_1 x CGN18024_3	3	0
AJW12_12#12	2	CGN18024_1 x CGN18024_3	3	0
AJW12_12#12	2	CGN18024_1 x CGN18024_3	3	0
AJW12_12#12	2	CGN18024_1 x CGN18024_3	3	0
AJW12_12#12	2	CGN18024_1 x CGN18024_3	3	0
AJW12_13#13	2	CGN18024_1 x CGN18024_3	1	NA
AJW12_13#13	2	CGN18024_1 x CGN18024_3	1	NA
AJW12_13#13	2	CGN18024_1 x CGN18024_3	1	NA
AJW12_13#13	2	CGN18024_1 x CGN18024_3	1	NA
AJW12_13#13	2	CGN18024_1 x CGN18024_3	1	NA
AJW12_13#13	2	CGN18024_1 x CGN18024_3	1	NA
AJW12_13#13	2	CGN18024_1 x CGN18024_3	2	7.62
AJW12_13#13	2	CGN18024_1 x CGN18024_3	2	6.47
AJW12_13#13	2	CGN18024_1 x CGN18024_3	2	7.82
AJW12_13#13	2	CGN18024_1 x CGN18024_3	2	7.82
AJW12_13#13	2	CGN18024_1 x CGN18024_3	2	7.48
AJW12_13#13	2	CGN18024_1 x CGN18024_3	2	0
AJW12_13#13	2	CGN18024_1 x CGN18024_3	3	3.68
AJW12_13#13	2	CGN18024_1 x CGN18024_3	3	5.32
AJW12_13#13	2	CGN18024_1 x CGN18024_3	3	5.25
AJW12_13#13	2	CGN18024_1 x CGN18024_3	3	5.2
AJW12_13#13	2	CGN18024_1 x CGN18024_3	3	8.13
AJW12_13#13	2	CGN18024_1 x CGN18024_3	3	5.4
AJW12_18#18	2	CGN18024_1 x CGN18024_3	1	0.94
AJW12_18#18	2	CGN18024_1 x CGN18024_3	1	0.94
AJW12_18#18	2	CGN18024_1 x CGN18024_3	1	0.94
AJW12_18#18	2	CGN18024_1 x CGN18024_3	1	0
AJW12_18#18	2	CGN18024_1 x CGN18024_3	1	0
AJW12_18#18	2	CGN18024_1 x CGN18024_3	1	0
AJW12_18#18	2	CGN18024_1 x CGN18024_3	2	0
AJW12_18#18	2	CGN18024_1 x CGN18024_3	2	0
AJW12_18#18	2	CGN18024_1 x CGN18024_3	2	0
AJW12_18#18	2	CGN18024_1 x CGN18024_3	2	0
AJW12_18#18	2	CGN18024_1 x CGN18024_3	2	0
AJW12_18#18	2	CGN18024_1 x CGN18024_3	2	0
AJW12_18#18	2	CGN18024_1 x CGN18024_3	3	0
AJW12_18#18	2	CGN18024_1 x CGN18024_3	3	0
AJW12_18#18	2	CGN18024_1 x CGN18024_3	3	0
AJW12_18#18	2	CGN18024_1 x CGN18024_3	3	0
AJW12_18#18	2	CGN18024_1 x CGN18024_3	3	0
AJW12_18#18	2	CGN18024_1 x CGN18024_3	3	0
AJW12_30#30	2	CGN18024_1 x CGN18024_3	1	0
AJW12_30#30	2	CGN18024_1 x CGN18024_3	1	0
AJW12_30#30	2	CGN18024_1 x CGN18024_3	1	0
AJW12_30#30	2	CGN18024_1 x CGN18024_3	1	0
AJW12_30#30	2	CGN18024_1 x CGN18024_3	1	0
AJW12_30#30	2	CGN18024_1 x CGN18024_3	1	0
AJW12_30#30	2	CGN18024_1 x CGN18024_3	2	0
AJW12_30#30	2	CGN18024_1 x CGN18024_3	2	0
AJW12_30#30	2	CGN18024_1 x CGN18024_3	2	0
AJW12_30#30	2	CGN18024_1 x CGN18024_3	2	2.48
AJW12_30#30	2	CGN18024_1 x CGN18024_3	2	0.47
AJW12_30#30	2	CGN18024_1 x CGN18024_3	2	0.47
AJW12_30#30	2	CGN18024_1 x CGN18024_3	3	2.69
AJW12_30#30	2	CGN18024_1 x CGN18024_3	3	2.69
AJW12_30#30	2	CGN18024_1 x CGN18024_3	3	1.28
AJW12_30#30	2	CGN18024_1 x CGN18024_3	3	0
AJW12_30#30	2	CGN18024_1 x CGN18024_3	3	0
AJW12_30#30	2	CGN18024_1 x CGN18024_3	3	0
AJW12_4#4	2	CGN18024_1 x CGN18024_3	1	3.42
AJW12_4#4	2	CGN18024_1 x CGN18024_3	1	5.03
AJW12_4#4	2	CGN18024_1 x CGN18024_3	1	4.6
AJW12_4#4	2	CGN18024_1 x CGN18024_3	1	5.81
AJW12_4#4	2	CGN18024_1 x CGN18024_3	1	5.1
AJW12_4#4	2	CGN18024_1 x CGN18024_3	1	5.1
AJW12_4#4	2	CGN18024_1 x CGN18024_3	2	4.23
AJW12_4#4	2	CGN18024_1 x CGN18024_3	2	5.89
AJW12_4#4	2	CGN18024_1 x CGN18024_3	2	5.98
AJW12_4#4	2	CGN18024_1 x CGN18024_3	2	5.98
AJW12_4#4	2	CGN18024_1 x CGN18024_3	2	4.9
AJW12_4#4	2	CGN18024_1 x CGN18024_3	2	4.9
AJW12_4#4	2	CGN18024_1 x CGN18024_3	3	3.02
AJW12_4#4	2	CGN18024_1 x CGN18024_3	3	3.55
AJW12_4#4	2	CGN18024_1 x CGN18024_3	3	4.46
AJW12_4#4	2	CGN18024_1 x CGN18024_3	3	3.79
AJW12_4#4	2	CGN18024_1 x CGN18024_3	3	2.86
AJW12_4#4	2	CGN18024_1 x CGN18024_3	3	4.2
CGN18024_1	2	NA	1	0
CGN18024_1	2	NA	1	0
CGN18024_1	2	NA	1	0
CGN18024_1	2	NA	1	0
CGN18024_1	2	NA	1	0
CGN18024_1	2	NA	1	0
CGN18024_1	2	NA	2	0
CGN18024_1	2	NA	2	0
CGN18024_1	2	NA	2	0
CGN18024_1	2	NA	2	0
CGN18024_1	2	NA	2	0
CGN18024_1	2	NA	2	0
CGN18024_1	2	NA	3	0
CGN18024_1	2	NA	3	0
CGN18024_1	2	NA	3	0
CGN18024_1	2	NA	3	3.05
CGN18024_1	2	NA	3	0
CGN18024_1	2	NA	3	0
AJW12_7#7	2	CGN18024_1 x CGN18024_3	1	NA
AJW12_7#7	2	CGN18024_1 x CGN18024_3	1	NA
AJW12_7#7	2	CGN18024_1 x CGN18024_3	1	NA
AJW12_7#7	2	CGN18024_1 x CGN18024_3	1	NA
AJW12_7#7	2	CGN18024_1 x CGN18024_3	1	NA
AJW12_7#7	2	CGN18024_1 x CGN18024_3	1	NA
AJW12_7#7	2	CGN18024_1 x CGN18024_3	2	NA
AJW12_7#7	2	CGN18024_1 x CGN18024_3	2	NA
AJW12_7#7	2	CGN18024_1 x CGN18024_3	2	NA
AJW12_7#7	2	CGN18024_1 x CGN18024_3	2	NA
AJW12_7#7	2	CGN18024_1 x CGN18024_3	2	NA
AJW12_7#7	2	CGN18024_1 x CGN18024_3	2	NA
AJW12_7#7	2	CGN18024_1 x CGN18024_3	3	4.46
AJW12_7#7	2	CGN18024_1 x CGN18024_3	3	4.46
AJW12_7#7	2	CGN18024_1 x CGN18024_3	3	4.58
AJW12_7#7	2	CGN18024_1 x CGN18024_3	3	4.56
AJW12_7#7	2	CGN18024_1 x CGN18024_3	3	4.01
AJW12_7#7	2	CGN18024_1 x CGN18024_3	3	4.44
AJW12_20#20	2	CGN18024_1 x CGN18024_3	1	3.96
AJW12_20#20	2	CGN18024_1 x CGN18024_3	1	4.81
AJW12_20#20	2	CGN18024_1 x CGN18024_3	1	4.99
AJW12_20#20	2	CGN18024_1 x CGN18024_3	1	4.91
AJW12_20#20	2	CGN18024_1 x CGN18024_3	1	4.91
AJW12_20#20	2	CGN18024_1 x CGN18024_3	1	5.39
AJW12_20#20	2	CGN18024_1 x CGN18024_3	2	3.1
AJW12_20#20	2	CGN18024_1 x CGN18024_3	2	4.84
AJW12_20#20	2	CGN18024_1 x CGN18024_3	2	5.7
AJW12_20#20	2	CGN18024_1 x CGN18024_3	2	4.1
AJW12_20#20	2	CGN18024_1 x CGN18024_3	2	4.07
AJW12_20#20	2	CGN18024_1 x CGN18024_3	2	4.78
AJW12_20#20	2	CGN18024_1 x CGN18024_3	3	4.63
AJW12_20#20	2	CGN18024_1 x CGN18024_3	3	6.14
AJW12_20#20	2	CGN18024_1 x CGN18024_3	3	6.14
AJW12_20#20	2	CGN18024_1 x CGN18024_3	3	5.89
AJW12_20#20	2	CGN18024_1 x CGN18024_3	3	4.87
AJW12_20#20	2	CGN18024_1 x CGN18024_3	3	4.19
AJW12_9#9	2	CGN18024_1 x CGN18024_3	1	0
AJW12_9#9	2	CGN18024_1 x CGN18024_3	1	0
AJW12_9#9	2	CGN18024_1 x CGN18024_3	1	0
AJW12_9#9	2	CGN18024_1 x CGN18024_3	1	0
AJW12_9#9	2	CGN18024_1 x CGN18024_3	1	0
AJW12_9#9	2	CGN18024_1 x CGN18024_3	1	0
AJW12_9#9	2	CGN18024_1 x CGN18024_3	2	0
AJW12_9#9	2	CGN18024_1 x CGN18024_3	2	0
AJW12_9#9	2	CGN18024_1 x CGN18024_3	2	0
AJW12_9#9	2	CGN18024_1 x CGN18024_3	2	0
AJW12_9#9	2	CGN18024_1 x CGN18024_3	2	0
AJW12_9#9	2	CGN18024_1 x CGN18024_3	2	0
AJW12_9#9	2	CGN18024_1 x CGN18024_3	3	0
AJW12_9#9	2	CGN18024_1 x CGN18024_3	3	0
AJW12_9#9	2	CGN18024_1 x CGN18024_3	3	0
AJW12_9#9	2	CGN18024_1 x CGN18024_3	3	0
AJW12_9#9	2	CGN18024_1 x CGN18024_3	3	0
AJW12_9#9	2	CGN18024_1 x CGN18024_3	3	0
AJW12_28#28	2	CGN18024_1 x CGN18024_3	1	NA
AJW12_28#28	2	CGN18024_1 x CGN18024_3	1	NA
AJW12_28#28	2	CGN18024_1 x CGN18024_3	1	NA
AJW12_28#28	2	CGN18024_1 x CGN18024_3	1	NA
AJW12_28#28	2	CGN18024_1 x CGN18024_3	1	NA
AJW12_28#28	2	CGN18024_1 x CGN18024_3	1	NA
AJW12_28#28	2	CGN18024_1 x CGN18024_3	2	5.12
AJW12_28#28	2	CGN18024_1 x CGN18024_3	2	6.64
AJW12_28#28	2	CGN18024_1 x CGN18024_3	2	4.83
AJW12_28#28	2	CGN18024_1 x CGN18024_3	2	4.37
AJW12_28#28	2	CGN18024_1 x CGN18024_3	2	6.81
AJW12_28#28	2	CGN18024_1 x CGN18024_3	2	5.4
AJW12_28#28	2	CGN18024_1 x CGN18024_3	3	5.09
AJW12_28#28	2	CGN18024_1 x CGN18024_3	3	4.55
AJW12_28#28	2	CGN18024_1 x CGN18024_3	3	6.08
AJW12_28#28	2	CGN18024_1 x CGN18024_3	3	6.8
AJW12_28#28	2	CGN18024_1 x CGN18024_3	3	5.14
AJW12_28#28	2	CGN18024_1 x CGN18024_3	3	6.05
AJW12_8#8	3	CGN18024_1 x CGN18024_3	1	0
AJW12_8#8	3	CGN18024_1 x CGN18024_3	1	0
AJW12_8#8	3	CGN18024_1 x CGN18024_3	1	0
AJW12_8#8	3	CGN18024_1 x CGN18024_3	1	1.71
AJW12_8#8	3	CGN18024_1 x CGN18024_3	1	1.93
AJW12_8#8	3	CGN18024_1 x CGN18024_3	1	0
AJW12_8#8	3	CGN18024_1 x CGN18024_3	2	0.73
AJW12_8#8	3	CGN18024_1 x CGN18024_3	2	0.73
AJW12_8#8	3	CGN18024_1 x CGN18024_3	2	0.73
AJW12_8#8	3	CGN18024_1 x CGN18024_3	2	0
AJW12_8#8	3	CGN18024_1 x CGN18024_3	2	0
AJW12_8#8	3	CGN18024_1 x CGN18024_3	2	0
AJW12_8#8	3	CGN18024_1 x CGN18024_3	3	0
AJW12_8#8	3	CGN18024_1 x CGN18024_3	3	0
AJW12_8#8	3	CGN18024_1 x CGN18024_3	3	0
AJW12_8#8	3	CGN18024_1 x CGN18024_3	3	0
AJW12_8#8	3	CGN18024_1 x CGN18024_3	3	0
AJW12_8#8	3	CGN18024_1 x CGN18024_3	3	0
AJW12_13#13	3	CGN18024_1 x CGN18024_3	1	2.03
AJW12_13#13	3	CGN18024_1 x CGN18024_3	1	4.16
AJW12_13#13	3	CGN18024_1 x CGN18024_3	1	4.19
AJW12_13#13	3	CGN18024_1 x CGN18024_3	1	4.07
AJW12_13#13	3	CGN18024_1 x CGN18024_3	1	NA
AJW12_13#13	3	CGN18024_1 x CGN18024_3	1	NA
AJW12_13#13	3	CGN18024_1 x CGN18024_3	2	3.26
AJW12_13#13	3	CGN18024_1 x CGN18024_3	2	4.71
AJW12_13#13	3	CGN18024_1 x CGN18024_3	2	4.48
AJW12_13#13	3	CGN18024_1 x CGN18024_3	2	3.71
AJW12_13#13	3	CGN18024_1 x CGN18024_3	2	NA
AJW12_13#13	3	CGN18024_1 x CGN18024_3	2	NA
AJW12_13#13	3	CGN18024_1 x CGN18024_3	3	3.69
AJW12_13#13	3	CGN18024_1 x CGN18024_3	3	3.16
AJW12_13#13	3	CGN18024_1 x CGN18024_3	3	0
AJW12_13#13	3	CGN18024_1 x CGN18024_3	3	2.46
AJW12_13#13	3	CGN18024_1 x CGN18024_3	3	NA
AJW12_13#13	3	CGN18024_1 x CGN18024_3	3	NA
AJW12_6#6	3	CGN18024_1 x CGN18024_3	1	5.8
AJW12_6#6	3	CGN18024_1 x CGN18024_3	1	5.66
AJW12_6#6	3	CGN18024_1 x CGN18024_3	1	6.25
AJW12_6#6	3	CGN18024_1 x CGN18024_3	1	5.85
AJW12_6#6	3	CGN18024_1 x CGN18024_3	1	5.83
AJW12_6#6	3	CGN18024_1 x CGN18024_3	1	5.07
AJW12_6#6	3	CGN18024_1 x CGN18024_3	2	5.37
AJW12_6#6	3	CGN18024_1 x CGN18024_3	2	6.07
AJW12_6#6	3	CGN18024_1 x CGN18024_3	2	6.49
AJW12_6#6	3	CGN18024_1 x CGN18024_3	2	4.74
AJW12_6#6	3	CGN18024_1 x CGN18024_3	2	5.79
AJW12_6#6	3	CGN18024_1 x CGN18024_3	2	6.63
AJW12_6#6	3	CGN18024_1 x CGN18024_3	3	5.71
AJW12_6#6	3	CGN18024_1 x CGN18024_3	3	5.44
AJW12_6#6	3	CGN18024_1 x CGN18024_3	3	5.48
AJW12_6#6	3	CGN18024_1 x CGN18024_3	3	5.33
AJW12_6#6	3	CGN18024_1 x CGN18024_3	3	4.14
AJW12_6#6	3	CGN18024_1 x CGN18024_3	3	4.53
CGN18024_1	3	NA	1	0
CGN18024_1	3	NA	1	0
CGN18024_1	3	NA	1	1.46
CGN18024_1	3	NA	1	0
CGN18024_1	3	NA	1	0
CGN18024_1	3	NA	1	0
CGN18024_1	3	NA	2	0
CGN18024_1	3	NA	2	0
CGN18024_1	3	NA	2	0
CGN18024_1	3	NA	2	0
CGN18024_1	3	NA	2	0
CGN18024_1	3	NA	2	0
CGN18024_1	3	NA	3	0
CGN18024_1	3	NA	3	0
CGN18024_1	3	NA	3	0
CGN18024_1	3	NA	3	0
CGN18024_1	3	NA	3	0
CGN18024_1	3	NA	3	0
AJW12_20#20	3	CGN18024_1 x CGN18024_3	1	6.64
AJW12_20#20	3	CGN18024_1 x CGN18024_3	1	5.92
AJW12_20#20	3	CGN18024_1 x CGN18024_3	1	6.49
AJW12_20#20	3	CGN18024_1 x CGN18024_3	1	4.51
AJW12_20#20	3	CGN18024_1 x CGN18024_3	1	6.07
AJW12_20#20	3	CGN18024_1 x CGN18024_3	1	5.14
AJW12_20#20	3	CGN18024_1 x CGN18024_3	2	5.42
AJW12_20#20	3	CGN18024_1 x CGN18024_3	2	5.12
AJW12_20#20	3	CGN18024_1 x CGN18024_3	2	5.23
AJW12_20#20	3	CGN18024_1 x CGN18024_3	2	6.24
AJW12_20#20	3	CGN18024_1 x CGN18024_3	2	5.63
AJW12_20#20	3	CGN18024_1 x CGN18024_3	2	5.63
AJW12_20#20	3	CGN18024_1 x CGN18024_3	3	5.61
AJW12_20#20	3	CGN18024_1 x CGN18024_3	3	5.07
AJW12_20#20	3	CGN18024_1 x CGN18024_3	3	5.46
AJW12_20#20	3	CGN18024_1 x CGN18024_3	3	4.84
AJW12_20#20	3	CGN18024_1 x CGN18024_3	3	3.88
AJW12_20#20	3	CGN18024_1 x CGN18024_3	3	5.22
AJW12_14#14	3	CGN18024_1 x CGN18024_3	1	4.28
AJW12_14#14	3	CGN18024_1 x CGN18024_3	1	4.28
AJW12_14#14	3	CGN18024_1 x CGN18024_3	1	4.36
AJW12_14#14	3	CGN18024_1 x CGN18024_3	1	3.32
AJW12_14#14	3	CGN18024_1 x CGN18024_3	1	4.83
AJW12_14#14	3	CGN18024_1 x CGN18024_3	1	5.65
AJW12_14#14	3	CGN18024_1 x CGN18024_3	2	5.23
AJW12_14#14	3	CGN18024_1 x CGN18024_3	2	4.37
AJW12_14#14	3	CGN18024_1 x CGN18024_3	2	5.17
AJW12_14#14	3	CGN18024_1 x CGN18024_3	2	4.07
AJW12_14#14	3	CGN18024_1 x CGN18024_3	2	5.33
AJW12_14#14	3	CGN18024_1 x CGN18024_3	2	4.75
AJW12_14#14	3	CGN18024_1 x CGN18024_3	3	3.88
AJW12_14#14	3	CGN18024_1 x CGN18024_3	3	4.63
AJW12_14#14	3	CGN18024_1 x CGN18024_3	3	4.04
AJW12_14#14	3	CGN18024_1 x CGN18024_3	3	3.45
AJW12_14#14	3	CGN18024_1 x CGN18024_3	3	5.65
AJW12_14#14	3	CGN18024_1 x CGN18024_3	3	4.92
CGN18024_3	3	NA	1	NA
CGN18024_3	3	NA	1	NA
CGN18024_3	3	NA	1	NA
CGN18024_3	3	NA	1	NA
CGN18024_3	3	NA	1	NA
CGN18024_3	3	NA	1	NA
CGN18024_3	3	NA	2	5.78
CGN18024_3	3	NA	2	6.33
CGN18024_3	3	NA	2	5.54
CGN18024_3	3	NA	2	4.74
CGN18024_3	3	NA	2	5.02
CGN18024_3	3	NA	2	5.02
CGN18024_3	3	NA	3	4.16
CGN18024_3	3	NA	3	4.05
CGN18024_3	3	NA	3	5.27
CGN18024_3	3	NA	3	5.98
CGN18024_3	3	NA	3	5.62
CGN18024_3	3	NA	3	4.33
AJW12_23#23	3	CGN18024_1 x CGN18024_3	1	0
AJW12_23#23	3	CGN18024_1 x CGN18024_3	1	0
AJW12_23#23	3	CGN18024_1 x CGN18024_3	1	0
AJW12_23#23	3	CGN18024_1 x CGN18024_3	1	0
AJW12_23#23	3	CGN18024_1 x CGN18024_3	1	0
AJW12_23#23	3	CGN18024_1 x CGN18024_3	1	0
AJW12_23#23	3	CGN18024_1 x CGN18024_3	2	0
AJW12_23#23	3	CGN18024_1 x CGN18024_3	2	0
AJW12_23#23	3	CGN18024_1 x CGN18024_3	2	0
AJW12_23#23	3	CGN18024_1 x CGN18024_3	2	0
AJW12_23#23	3	CGN18024_1 x CGN18024_3	2	0
AJW12_23#23	3	CGN18024_1 x CGN18024_3	2	0
AJW12_23#23	3	CGN18024_1 x CGN18024_3	3	0
AJW12_23#23	3	CGN18024_1 x CGN18024_3	3	0
AJW12_23#23	3	CGN18024_1 x CGN18024_3	3	0
AJW12_23#23	3	CGN18024_1 x CGN18024_3	3	0
AJW12_23#23	3	CGN18024_1 x CGN18024_3	3	0
AJW12_23#23	3	CGN18024_1 x CGN18024_3	3	0
AJW12_2#2	3	CGN18024_1 x CGN18024_3	1	0.83
AJW12_2#2	3	CGN18024_1 x CGN18024_3	1	0.83
AJW12_2#2	3	CGN18024_1 x CGN18024_3	1	0.83
AJW12_2#2	3	CGN18024_1 x CGN18024_3	1	0
AJW12_2#2	3	CGN18024_1 x CGN18024_3	1	0
AJW12_2#2	3	CGN18024_1 x CGN18024_3	1	0
AJW12_2#2	3	CGN18024_1 x CGN18024_3	2	0
AJW12_2#2	3	CGN18024_1 x CGN18024_3	2	0
AJW12_2#2	3	CGN18024_1 x CGN18024_3	2	0
AJW12_2#2	3	CGN18024_1 x CGN18024_3	2	0
AJW12_2#2	3	CGN18024_1 x CGN18024_3	2	0
AJW12_2#2	3	CGN18024_1 x CGN18024_3	2	0
AJW12_2#2	3	CGN18024_1 x CGN18024_3	3	1.75
AJW12_2#2	3	CGN18024_1 x CGN18024_3	3	1.75
AJW12_2#2	3	CGN18024_1 x CGN18024_3	3	0.91
AJW12_2#2	3	CGN18024_1 x CGN18024_3	3	0.88
AJW12_2#2	3	CGN18024_1 x CGN18024_3	3	0.73
AJW12_2#2	3	CGN18024_1 x CGN18024_3	3	0
AJW12_16#16	3	CGN18024_1 x CGN18024_3	1	0
AJW12_16#16	3	CGN18024_1 x CGN18024_3	1	0
AJW12_16#16	3	CGN18024_1 x CGN18024_3	1	0
AJW12_16#16	3	CGN18024_1 x CGN18024_3	1	1.27
AJW12_16#16	3	CGN18024_1 x CGN18024_3	1	1.27
AJW12_16#16	3	CGN18024_1 x CGN18024_3	1	0
AJW12_16#16	3	CGN18024_1 x CGN18024_3	2	2.6
AJW12_16#16	3	CGN18024_1 x CGN18024_3	2	2.18
AJW12_16#16	3	CGN18024_1 x CGN18024_3	2	2.18
AJW12_16#16	3	CGN18024_1 x CGN18024_3	2	1.39
AJW12_16#16	3	CGN18024_1 x CGN18024_3	2	1.39
AJW12_16#16	3	CGN18024_1 x CGN18024_3	2	0.45
AJW12_16#16	3	CGN18024_1 x CGN18024_3	3	2.41
AJW12_16#16	3	CGN18024_1 x CGN18024_3	3	2.19
AJW12_16#16	3	CGN18024_1 x CGN18024_3	3	2.02
AJW12_16#16	3	CGN18024_1 x CGN18024_3	3	0
AJW12_16#16	3	CGN18024_1 x CGN18024_3	3	0
AJW12_16#16	3	CGN18024_1 x CGN18024_3	3	0
AJW12_19#19	3	CGN18024_1 x CGN18024_3	1	5.24
AJW12_19#19	3	CGN18024_1 x CGN18024_3	1	4.68
AJW12_19#19	3	CGN18024_1 x CGN18024_3	1	5.05
AJW12_19#19	3	CGN18024_1 x CGN18024_3	1	4.37
AJW12_19#19	3	CGN18024_1 x CGN18024_3	1	5.42
AJW12_19#19	3	CGN18024_1 x CGN18024_3	1	4.58
AJW12_19#19	3	CGN18024_1 x CGN18024_3	2	6.43
AJW12_19#19	3	CGN18024_1 x CGN18024_3	2	4.12
AJW12_19#19	3	CGN18024_1 x CGN18024_3	2	4.12
AJW12_19#19	3	CGN18024_1 x CGN18024_3	2	5.24
AJW12_19#19	3	CGN18024_1 x CGN18024_3	2	4.76
AJW12_19#19	3	CGN18024_1 x CGN18024_3	2	4.76
AJW12_19#19	3	CGN18024_1 x CGN18024_3	3	5.29
AJW12_19#19	3	CGN18024_1 x CGN18024_3	3	5.02
AJW12_19#19	3	CGN18024_1 x CGN18024_3	3	4.36
AJW12_19#19	3	CGN18024_1 x CGN18024_3	3	4.91
AJW12_19#19	3	CGN18024_1 x CGN18024_3	3	4.97
AJW12_19#19	3	CGN18024_1 x CGN18024_3	3	5.7
AJW12_22#22	3	CGN18024_1 x CGN18024_3	1	4.94
AJW12_22#22	3	CGN18024_1 x CGN18024_3	1	4.95
AJW12_22#22	3	CGN18024_1 x CGN18024_3	1	4.95
AJW12_22#22	3	CGN18024_1 x CGN18024_3	1	4.99
AJW12_22#22	3	CGN18024_1 x CGN18024_3	1	5.21
AJW12_22#22	3	CGN18024_1 x CGN18024_3	1	4.3
AJW12_22#22	3	CGN18024_1 x CGN18024_3	2	4.24
AJW12_22#22	3	CGN18024_1 x CGN18024_3	2	4.74
AJW12_22#22	3	CGN18024_1 x CGN18024_3	2	5.05
AJW12_22#22	3	CGN18024_1 x CGN18024_3	2	4.99
AJW12_22#22	3	CGN18024_1 x CGN18024_3	2	4.11
AJW12_22#22	3	CGN18024_1 x CGN18024_3	2	4.57
AJW12_22#22	3	CGN18024_1 x CGN18024_3	3	3.62
AJW12_22#22	3	CGN18024_1 x CGN18024_3	3	4.36
AJW12_22#22	3	CGN18024_1 x CGN18024_3	3	5.33
AJW12_22#22	3	CGN18024_1 x CGN18024_3	3	5.13
AJW12_22#22	3	CGN18024_1 x CGN18024_3	3	2.02
AJW12_22#22	3	CGN18024_1 x CGN18024_3	3	1.98
AJW12_26#26	3	CGN18024_1 x CGN18024_3	1	0.01
AJW12_26#26	3	CGN18024_1 x CGN18024_3	1	0.02
AJW12_26#26	3	CGN18024_1 x CGN18024_3	1	0.02
AJW12_26#26	3	CGN18024_1 x CGN18024_3	1	0.02
AJW12_26#26	3	CGN18024_1 x CGN18024_3	1	0.02
AJW12_26#26	3	CGN18024_1 x CGN18024_3	1	0.02
AJW12_26#26	3	CGN18024_1 x CGN18024_3	2	0.02
AJW12_26#26	3	CGN18024_1 x CGN18024_3	2	0.02
AJW12_26#26	3	CGN18024_1 x CGN18024_3	2	0.02
AJW12_26#26	3	CGN18024_1 x CGN18024_3	2	0.02
AJW12_26#26	3	CGN18024_1 x CGN18024_3	2	0.02
AJW12_26#26	3	CGN18024_1 x CGN18024_3	2	0.02
AJW12_26#26	3	CGN18024_1 x CGN18024_3	3	0.02
AJW12_26#26	3	CGN18024_1 x CGN18024_3	3	0.02
AJW12_26#26	3	CGN18024_1 x CGN18024_3	3	0.02
AJW12_26#26	3	CGN18024_1 x CGN18024_3	3	0
AJW12_26#26	3	CGN18024_1 x CGN18024_3	3	0
AJW12_26#26	3	CGN18024_1 x CGN18024_3	3	0
AJW12_1#1	3	CGN18024_1 x CGN18024_3	1	5.64
AJW12_1#1	3	CGN18024_1 x CGN18024_3	1	4.42
AJW12_1#1	3	CGN18024_1 x CGN18024_3	1	3.7
AJW12_1#1	3	CGN18024_1 x CGN18024_3	1	5.31
AJW12_1#1	3	CGN18024_1 x CGN18024_3	1	5.88
AJW12_1#1	3	CGN18024_1 x CGN18024_3	1	5.85
AJW12_1#1	3	CGN18024_1 x CGN18024_3	2	4.28
AJW12_1#1	3	CGN18024_1 x CGN18024_3	2	6.58
AJW12_1#1	3	CGN18024_1 x CGN18024_3	2	6.58
AJW12_1#1	3	CGN18024_1 x CGN18024_3	2	6.17
AJW12_1#1	3	CGN18024_1 x CGN18024_3	2	3.39
AJW12_1#1	3	CGN18024_1 x CGN18024_3	2	3.39
AJW12_1#1	3	CGN18024_1 x CGN18024_3	3	4.48
AJW12_1#1	3	CGN18024_1 x CGN18024_3	3	4.22
AJW12_1#1	3	CGN18024_1 x CGN18024_3	3	5.15
AJW12_1#1	3	CGN18024_1 x CGN18024_3	3	5.15
AJW12_1#1	3	CGN18024_1 x CGN18024_3	3	5.93
AJW12_1#1	3	CGN18024_1 x CGN18024_3	3	4.17
AJW12_7#7	3	CGN18024_1 x CGN18024_3	1	4.04
AJW12_7#7	3	CGN18024_1 x CGN18024_3	1	6.29
AJW12_7#7	3	CGN18024_1 x CGN18024_3	1	5.44
AJW12_7#7	3	CGN18024_1 x CGN18024_3	1	6.43
AJW12_7#7	3	CGN18024_1 x CGN18024_3	1	6.28
AJW12_7#7	3	CGN18024_1 x CGN18024_3	1	5.56
AJW12_7#7	3	CGN18024_1 x CGN18024_3	2	5.56
AJW12_7#7	3	CGN18024_1 x CGN18024_3	2	3.87
AJW12_7#7	3	CGN18024_1 x CGN18024_3	2	5.08
AJW12_7#7	3	CGN18024_1 x CGN18024_3	2	6.81
AJW12_7#7	3	CGN18024_1 x CGN18024_3	2	5.04
AJW12_7#7	3	CGN18024_1 x CGN18024_3	2	4.71
AJW12_7#7	3	CGN18024_1 x CGN18024_3	3	4.71
AJW12_7#7	3	CGN18024_1 x CGN18024_3	3	4.71
AJW12_7#7	3	CGN18024_1 x CGN18024_3	3	3.62
AJW12_7#7	3	CGN18024_1 x CGN18024_3	3	4.76
AJW12_7#7	3	CGN18024_1 x CGN18024_3	3	3.23
AJW12_7#7	3	CGN18024_1 x CGN18024_3	3	4.6
AJW12_29#29	3	CGN18024_1 x CGN18024_3	1	0
AJW12_29#29	3	CGN18024_1 x CGN18024_3	1	0
AJW12_29#29	3	CGN18024_1 x CGN18024_3	1	3.41
AJW12_29#29	3	CGN18024_1 x CGN18024_3	1	0
AJW12_29#29	3	CGN18024_1 x CGN18024_3	1	0
AJW12_29#29	3	CGN18024_1 x CGN18024_3	1	0
AJW12_29#29	3	CGN18024_1 x CGN18024_3	2	0.78
AJW12_29#29	3	CGN18024_1 x CGN18024_3	2	0.78
AJW12_29#29	3	CGN18024_1 x CGN18024_3	2	0.78
AJW12_29#29	3	CGN18024_1 x CGN18024_3	2	0
AJW12_29#29	3	CGN18024_1 x CGN18024_3	2	0
AJW12_29#29	3	CGN18024_1 x CGN18024_3	2	0
AJW12_29#29	3	CGN18024_1 x CGN18024_3	3	0
AJW12_29#29	3	CGN18024_1 x CGN18024_3	3	0
AJW12_29#29	3	CGN18024_1 x CGN18024_3	3	0
AJW12_29#29	3	CGN18024_1 x CGN18024_3	3	0
AJW12_29#29	3	CGN18024_1 x CGN18024_3	3	0
AJW12_29#29	3	CGN18024_1 x CGN18024_3	3	0
AJW12_15#15	3	CGN18024_1 x CGN18024_3	1	1.59
AJW12_15#15	3	CGN18024_1 x CGN18024_3	1	1.59
AJW12_15#15	3	CGN18024_1 x CGN18024_3	1	1.45
AJW12_15#15	3	CGN18024_1 x CGN18024_3	1	0
AJW12_15#15	3	CGN18024_1 x CGN18024_3	1	0
AJW12_15#15	3	CGN18024_1 x CGN18024_3	1	0
AJW12_15#15	3	CGN18024_1 x CGN18024_3	2	2.43
AJW12_15#15	3	CGN18024_1 x CGN18024_3	2	2.43
AJW12_15#15	3	CGN18024_1 x CGN18024_3	2	2.43
AJW12_15#15	3	CGN18024_1 x CGN18024_3	2	2.43
AJW12_15#15	3	CGN18024_1 x CGN18024_3	2	2.43
AJW12_15#15	3	CGN18024_1 x CGN18024_3	2	0.79
AJW12_15#15	3	CGN18024_1 x CGN18024_3	3	2.39
AJW12_15#15	3	CGN18024_1 x CGN18024_3	3	2.39
AJW12_15#15	3	CGN18024_1 x CGN18024_3	3	2.39
AJW12_15#15	3	CGN18024_1 x CGN18024_3	3	2.39
AJW12_15#15	3	CGN18024_1 x CGN18024_3	3	0.31
AJW12_15#15	3	CGN18024_1 x CGN18024_3	3	0
AJW12_9#9	3	CGN18024_1 x CGN18024_3	1	0
AJW12_9#9	3	CGN18024_1 x CGN18024_3	1	0
AJW12_9#9	3	CGN18024_1 x CGN18024_3	1	0
AJW12_9#9	3	CGN18024_1 x CGN18024_3	1	0
AJW12_9#9	3	CGN18024_1 x CGN18024_3	1	0
AJW12_9#9	3	CGN18024_1 x CGN18024_3	1	0
AJW12_9#9	3	CGN18024_1 x CGN18024_3	2	0
AJW12_9#9	3	CGN18024_1 x CGN18024_3	2	0
AJW12_9#9	3	CGN18024_1 x CGN18024_3	2	1.61
AJW12_9#9	3	CGN18024_1 x CGN18024_3	2	2.39
AJW12_9#9	3	CGN18024_1 x CGN18024_3	2	2.39
AJW12_9#9	3	CGN18024_1 x CGN18024_3	2	3.93
AJW12_9#9	3	CGN18024_1 x CGN18024_3	3	3.51
AJW12_9#9	3	CGN18024_1 x CGN18024_3	3	0
AJW12_9#9	3	CGN18024_1 x CGN18024_3	3	0
AJW12_9#9	3	CGN18024_1 x CGN18024_3	3	0
AJW12_9#9	3	CGN18024_1 x CGN18024_3	3	1.32
AJW12_9#9	3	CGN18024_1 x CGN18024_3	3	1.32
AJW12_5#5	3	CGN18024_1 x CGN18024_3	1	0
AJW12_5#5	3	CGN18024_1 x CGN18024_3	1	0
AJW12_5#5	3	CGN18024_1 x CGN18024_3	1	0
AJW12_5#5	3	CGN18024_1 x CGN18024_3	1	0
AJW12_5#5	3	CGN18024_1 x CGN18024_3	1	0
AJW12_5#5	3	CGN18024_1 x CGN18024_3	1	0
AJW12_5#5	3	CGN18024_1 x CGN18024_3	2	0
AJW12_5#5	3	CGN18024_1 x CGN18024_3	2	0
AJW12_5#5	3	CGN18024_1 x CGN18024_3	2	0
AJW12_5#5	3	CGN18024_1 x CGN18024_3	2	0
AJW12_5#5	3	CGN18024_1 x CGN18024_3	2	0
AJW12_5#5	3	CGN18024_1 x CGN18024_3	2	0
AJW12_5#5	3	CGN18024_1 x CGN18024_3	3	0
AJW12_5#5	3	CGN18024_1 x CGN18024_3	3	0
AJW12_5#5	3	CGN18024_1 x CGN18024_3	3	0
AJW12_5#5	3	CGN18024_1 x CGN18024_3	3	0
AJW12_5#5	3	CGN18024_1 x CGN18024_3	3	0
AJW12_5#5	3	CGN18024_1 x CGN18024_3	3	0
AJW12_12#12	3	CGN18024_1 x CGN18024_3	1	1.1
AJW12_12#12	3	CGN18024_1 x CGN18024_3	1	1.1
AJW12_12#12	3	CGN18024_1 x CGN18024_3	1	1.1
AJW12_12#12	3	CGN18024_1 x CGN18024_3	1	0
AJW12_12#12	3	CGN18024_1 x CGN18024_3	1	0
AJW12_12#12	3	CGN18024_1 x CGN18024_3	1	0
AJW12_12#12	3	CGN18024_1 x CGN18024_3	2	0
AJW12_12#12	3	CGN18024_1 x CGN18024_3	2	0
AJW12_12#12	3	CGN18024_1 x CGN18024_3	2	0
AJW12_12#12	3	CGN18024_1 x CGN18024_3	2	2.49
AJW12_12#12	3	CGN18024_1 x CGN18024_3	2	0.69
AJW12_12#12	3	CGN18024_1 x CGN18024_3	2	1.62
AJW12_12#12	3	CGN18024_1 x CGN18024_3	3	1.62
AJW12_12#12	3	CGN18024_1 x CGN18024_3	3	0
AJW12_12#12	3	CGN18024_1 x CGN18024_3	3	0.39
AJW12_12#12	3	CGN18024_1 x CGN18024_3	3	0.4
AJW12_12#12	3	CGN18024_1 x CGN18024_3	3	0.4
AJW12_12#12	3	CGN18024_1 x CGN18024_3	3	0
AJW12_27#27	3	CGN18024_1 x CGN18024_3	1	0
AJW12_27#27	3	CGN18024_1 x CGN18024_3	1	0
AJW12_27#27	3	CGN18024_1 x CGN18024_3	1	1.89
AJW12_27#27	3	CGN18024_1 x CGN18024_3	1	3.84
AJW12_27#27	3	CGN18024_1 x CGN18024_3	1	3.54
AJW12_27#27	3	CGN18024_1 x CGN18024_3	1	3.34
AJW12_27#27	3	CGN18024_1 x CGN18024_3	2	0
AJW12_27#27	3	CGN18024_1 x CGN18024_3	2	0
AJW12_27#27	3	CGN18024_1 x CGN18024_3	2	0.66
AJW12_27#27	3	CGN18024_1 x CGN18024_3	2	2.74
AJW12_27#27	3	CGN18024_1 x CGN18024_3	2	0
AJW12_27#27	3	CGN18024_1 x CGN18024_3	2	2.24
AJW12_27#27	3	CGN18024_1 x CGN18024_3	3	0.84
AJW12_27#27	3	CGN18024_1 x CGN18024_3	3	0.84
AJW12_27#27	3	CGN18024_1 x CGN18024_3	3	0.84
AJW12_27#27	3	CGN18024_1 x CGN18024_3	3	0.84
AJW12_27#27	3	CGN18024_1 x CGN18024_3	3	0.83
AJW12_27#27	3	CGN18024_1 x CGN18024_3	3	0.83
AJW12_3#3	3	CGN18024_1 x CGN18024_3	1	0
AJW12_3#3	3	CGN18024_1 x CGN18024_3	1	0
AJW12_3#3	3	CGN18024_1 x CGN18024_3	1	0
AJW12_3#3	3	CGN18024_1 x CGN18024_3	1	0
AJW12_3#3	3	CGN18024_1 x CGN18024_3	1	0
AJW12_3#3	3	CGN18024_1 x CGN18024_3	1	0
AJW12_3#3	3	CGN18024_1 x CGN18024_3	2	0
AJW12_3#3	3	CGN18024_1 x CGN18024_3	2	0
AJW12_3#3	3	CGN18024_1 x CGN18024_3	2	0
AJW12_3#3	3	CGN18024_1 x CGN18024_3	2	0
AJW12_3#3	3	CGN18024_1 x CGN18024_3	2	0
AJW12_3#3	3	CGN18024_1 x CGN18024_3	2	0
AJW12_3#3	3	CGN18024_1 x CGN18024_3	3	0
AJW12_3#3	3	CGN18024_1 x CGN18024_3	3	0
AJW12_3#3	3	CGN18024_1 x CGN18024_3	3	0
AJW12_3#3	3	CGN18024_1 x CGN18024_3	3	0
AJW12_3#3	3	CGN18024_1 x CGN18024_3	3	0
AJW12_3#3	3	CGN18024_1 x CGN18024_3	3	0
AJW12_21#21	3	CGN18024_1 x CGN18024_3	1	0
AJW12_21#21	3	CGN18024_1 x CGN18024_3	1	0
AJW12_21#21	3	CGN18024_1 x CGN18024_3	1	1.93
AJW12_21#21	3	CGN18024_1 x CGN18024_3	1	2.94
AJW12_21#21	3	CGN18024_1 x CGN18024_3	1	0
AJW12_21#21	3	CGN18024_1 x CGN18024_3	1	0
AJW12_21#21	3	CGN18024_1 x CGN18024_3	2	2.18
AJW12_21#21	3	CGN18024_1 x CGN18024_3	2	3.5
AJW12_21#21	3	CGN18024_1 x CGN18024_3	2	0.94
AJW12_21#21	3	CGN18024_1 x CGN18024_3	2	0
AJW12_21#21	3	CGN18024_1 x CGN18024_3	2	0
AJW12_21#21	3	CGN18024_1 x CGN18024_3	2	0
AJW12_21#21	3	CGN18024_1 x CGN18024_3	3	1.56
AJW12_21#21	3	CGN18024_1 x CGN18024_3	3	0
AJW12_21#21	3	CGN18024_1 x CGN18024_3	3	0.81
AJW12_21#21	3	CGN18024_1 x CGN18024_3	3	0
AJW12_21#21	3	CGN18024_1 x CGN18024_3	3	0
AJW12_21#21	3	CGN18024_1 x CGN18024_3	3	0
AJW12_18#18	3	CGN18024_1 x CGN18024_3	1	1
AJW12_18#18	3	CGN18024_1 x CGN18024_3	1	1
AJW12_18#18	3	CGN18024_1 x CGN18024_3	1	2.09
AJW12_18#18	3	CGN18024_1 x CGN18024_3	1	0
AJW12_18#18	3	CGN18024_1 x CGN18024_3	1	0
AJW12_18#18	3	CGN18024_1 x CGN18024_3	1	0
AJW12_18#18	3	CGN18024_1 x CGN18024_3	2	0
AJW12_18#18	3	CGN18024_1 x CGN18024_3	2	0
AJW12_18#18	3	CGN18024_1 x CGN18024_3	2	0
AJW12_18#18	3	CGN18024_1 x CGN18024_3	2	0
AJW12_18#18	3	CGN18024_1 x CGN18024_3	2	0
AJW12_18#18	3	CGN18024_1 x CGN18024_3	2	0
AJW12_18#18	3	CGN18024_1 x CGN18024_3	3	0
AJW12_18#18	3	CGN18024_1 x CGN18024_3	3	0
AJW12_18#18	3	CGN18024_1 x CGN18024_3	3	0.03
AJW12_18#18	3	CGN18024_1 x CGN18024_3	3	0.03
AJW12_18#18	3	CGN18024_1 x CGN18024_3	3	0
AJW12_18#18	3	CGN18024_1 x CGN18024_3	3	0
AJW12_11#11	3	CGN18024_1 x CGN18024_3	1	3.37
AJW12_11#11	3	CGN18024_1 x CGN18024_3	1	5.1
AJW12_11#11	3	CGN18024_1 x CGN18024_3	1	5.02
AJW12_11#11	3	CGN18024_1 x CGN18024_3	1	6.25
AJW12_11#11	3	CGN18024_1 x CGN18024_3	1	5.58
AJW12_11#11	3	CGN18024_1 x CGN18024_3	1	6.09
AJW12_11#11	3	CGN18024_1 x CGN18024_3	2	6.15
AJW12_11#11	3	CGN18024_1 x CGN18024_3	2	5.56
AJW12_11#11	3	CGN18024_1 x CGN18024_3	2	4.3
AJW12_11#11	3	CGN18024_1 x CGN18024_3	2	5.23
AJW12_11#11	3	CGN18024_1 x CGN18024_3	2	5.23
AJW12_11#11	3	CGN18024_1 x CGN18024_3	2	5.23
AJW12_11#11	3	CGN18024_1 x CGN18024_3	3	5.81
AJW12_11#11	3	CGN18024_1 x CGN18024_3	3	6.11
AJW12_11#11	3	CGN18024_1 x CGN18024_3	3	7.02
AJW12_11#11	3	CGN18024_1 x CGN18024_3	3	6.59
AJW12_11#11	3	CGN18024_1 x CGN18024_3	3	5.51
AJW12_11#11	3	CGN18024_1 x CGN18024_3	3	5.51
AJW12_4#4	3	CGN18024_1 x CGN18024_3	1	5.58
AJW12_4#4	3	CGN18024_1 x CGN18024_3	1	4.54
AJW12_4#4	3	CGN18024_1 x CGN18024_3	1	4.54
AJW12_4#4	3	CGN18024_1 x CGN18024_3	1	3.93
AJW12_4#4	3	CGN18024_1 x CGN18024_3	1	3.93
AJW12_4#4	3	CGN18024_1 x CGN18024_3	1	3.93
AJW12_4#4	3	CGN18024_1 x CGN18024_3	2	5.67
AJW12_4#4	3	CGN18024_1 x CGN18024_3	2	5.69
AJW12_4#4	3	CGN18024_1 x CGN18024_3	2	4.5
AJW12_4#4	3	CGN18024_1 x CGN18024_3	2	3.91
AJW12_4#4	3	CGN18024_1 x CGN18024_3	2	4.99
AJW12_4#4	3	CGN18024_1 x CGN18024_3	2	2.35
AJW12_4#4	3	CGN18024_1 x CGN18024_3	3	4.51
AJW12_4#4	3	CGN18024_1 x CGN18024_3	3	4.48
AJW12_4#4	3	CGN18024_1 x CGN18024_3	3	5.4
AJW12_4#4	3	CGN18024_1 x CGN18024_3	3	5.26
AJW12_4#4	3	CGN18024_1 x CGN18024_3	3	4.26
AJW12_4#4	3	CGN18024_1 x CGN18024_3	3	5.06
AJW12_10#10	3	CGN18024_1 x CGN18024_3	1	6.97
AJW12_10#10	3	CGN18024_1 x CGN18024_3	1	6.63
AJW12_10#10	3	CGN18024_1 x CGN18024_3	1	4.94
AJW12_10#10	3	CGN18024_1 x CGN18024_3	1	6.8
AJW12_10#10	3	CGN18024_1 x CGN18024_3	1	6.25
AJW12_10#10	3	CGN18024_1 x CGN18024_3	1	6.25
AJW12_10#10	3	CGN18024_1 x CGN18024_3	2	7.74
AJW12_10#10	3	CGN18024_1 x CGN18024_3	2	6.7
AJW12_10#10	3	CGN18024_1 x CGN18024_3	2	6.47
AJW12_10#10	3	CGN18024_1 x CGN18024_3	2	8.16
AJW12_10#10	3	CGN18024_1 x CGN18024_3	2	6.95
AJW12_10#10	3	CGN18024_1 x CGN18024_3	2	6.66
AJW12_10#10	3	CGN18024_1 x CGN18024_3	3	5.13
AJW12_10#10	3	CGN18024_1 x CGN18024_3	3	5.89
AJW12_10#10	3	CGN18024_1 x CGN18024_3	3	4.91
AJW12_10#10	3	CGN18024_1 x CGN18024_3	3	5.35
AJW12_10#10	3	CGN18024_1 x CGN18024_3	3	6.29
AJW12_10#10	3	CGN18024_1 x CGN18024_3	3	5.39
AJW12_28#28	3	CGN18024_1 x CGN18024_3	1	5.42
AJW12_28#28	3	CGN18024_1 x CGN18024_3	1	4.7
AJW12_28#28	3	CGN18024_1 x CGN18024_3	1	4
AJW12_28#28	3	CGN18024_1 x CGN18024_3	1	1.41
AJW12_28#28	3	CGN18024_1 x CGN18024_3	1	0
AJW12_28#28	3	CGN18024_1 x CGN18024_3	1	0
AJW12_28#28	3	CGN18024_1 x CGN18024_3	2	4.12
AJW12_28#28	3	CGN18024_1 x CGN18024_3	2	6.23
AJW12_28#28	3	CGN18024_1 x CGN18024_3	2	5.39
AJW12_28#28	3	CGN18024_1 x CGN18024_3	2	6.13
AJW12_28#28	3	CGN18024_1 x CGN18024_3	2	4.68
AJW12_28#28	3	CGN18024_1 x CGN18024_3	2	6.22
AJW12_28#28	3	CGN18024_1 x CGN18024_3	3	6.04
AJW12_28#28	3	CGN18024_1 x CGN18024_3	3	7.1
AJW12_28#28	3	CGN18024_1 x CGN18024_3	3	6.54
AJW12_28#28	3	CGN18024_1 x CGN18024_3	3	6.84
AJW12_28#28	3	CGN18024_1 x CGN18024_3	3	6.26
AJW12_28#28	3	CGN18024_1 x CGN18024_3	3	6.11
AJW12_24#24	3	CGN18024_1 x CGN18024_3	1	4.91
AJW12_24#24	3	CGN18024_1 x CGN18024_3	1	7.28
AJW12_24#24	3	CGN18024_1 x CGN18024_3	1	6.93
AJW12_24#24	3	CGN18024_1 x CGN18024_3	1	5.04
AJW12_24#24	3	CGN18024_1 x CGN18024_3	1	6.38
AJW12_24#24	3	CGN18024_1 x CGN18024_3	1	5.83
AJW12_24#24	3	CGN18024_1 x CGN18024_3	2	6.37
AJW12_24#24	3	CGN18024_1 x CGN18024_3	2	5.45
AJW12_24#24	3	CGN18024_1 x CGN18024_3	2	5.45
AJW12_24#24	3	CGN18024_1 x CGN18024_3	2	5.45
AJW12_24#24	3	CGN18024_1 x CGN18024_3	2	5.45
AJW12_24#24	3	CGN18024_1 x CGN18024_3	2	5.45
AJW12_24#24	3	CGN18024_1 x CGN18024_3	3	4.72
AJW12_24#24	3	CGN18024_1 x CGN18024_3	3	5.11
AJW12_24#24	3	CGN18024_1 x CGN18024_3	3	6.59
AJW12_24#24	3	CGN18024_1 x CGN18024_3	3	5.19
AJW12_24#24	3	CGN18024_1 x CGN18024_3	3	5.96
AJW12_24#24	3	CGN18024_1 x CGN18024_3	3	3.78
AJW12_17#17	3	CGN18024_1 x CGN18024_3	1	5.71
AJW12_17#17	3	CGN18024_1 x CGN18024_3	1	6.69
AJW12_17#17	3	CGN18024_1 x CGN18024_3	1	5.79
AJW12_17#17	3	CGN18024_1 x CGN18024_3	1	6.61
AJW12_17#17	3	CGN18024_1 x CGN18024_3	1	5.14
AJW12_17#17	3	CGN18024_1 x CGN18024_3	1	5.78
AJW12_17#17	3	CGN18024_1 x CGN18024_3	2	4.11
AJW12_17#17	3	CGN18024_1 x CGN18024_3	2	5.29
AJW12_17#17	3	CGN18024_1 x CGN18024_3	2	5.3
AJW12_17#17	3	CGN18024_1 x CGN18024_3	2	5.3
AJW12_17#17	3	CGN18024_1 x CGN18024_3	2	5.3
AJW12_17#17	3	CGN18024_1 x CGN18024_3	2	6.27
AJW12_17#17	3	CGN18024_1 x CGN18024_3	3	4.79
AJW12_17#17	3	CGN18024_1 x CGN18024_3	3	5.76
AJW12_17#17	3	CGN18024_1 x CGN18024_3	3	5.74
AJW12_17#17	3	CGN18024_1 x CGN18024_3	3	5.73
AJW12_17#17	3	CGN18024_1 x CGN18024_3	3	6.44
AJW12_17#17	3	CGN18024_1 x CGN18024_3	3	6.78
AJW12_30#30	3	CGN18024_1 x CGN18024_3	1	0
AJW12_30#30	3	CGN18024_1 x CGN18024_3	1	0
AJW12_30#30	3	CGN18024_1 x CGN18024_3	1	0
AJW12_30#30	3	CGN18024_1 x CGN18024_3	1	0
AJW12_30#30	3	CGN18024_1 x CGN18024_3	1	0
AJW12_30#30	3	CGN18024_1 x CGN18024_3	1	0
AJW12_30#30	3	CGN18024_1 x CGN18024_3	2	0
AJW12_30#30	3	CGN18024_1 x CGN18024_3	2	0
AJW12_30#30	3	CGN18024_1 x CGN18024_3	2	1.85
AJW12_30#30	3	CGN18024_1 x CGN18024_3	2	1.92
AJW12_30#30	3	CGN18024_1 x CGN18024_3	2	1.08
AJW12_30#30	3	CGN18024_1 x CGN18024_3	2	1.08
AJW12_30#30	3	CGN18024_1 x CGN18024_3	3	2.52
AJW12_30#30	3	CGN18024_1 x CGN18024_3	3	2.58
AJW12_30#30	3	CGN18024_1 x CGN18024_3	3	1.64
AJW12_30#30	3	CGN18024_1 x CGN18024_3	3	0
AJW12_30#30	3	CGN18024_1 x CGN18024_3	3	0
AJW12_30#30	3	CGN18024_1 x CGN18024_3	3	0
AJW12_25#25	3	CGN18024_1 x CGN18024_3	1	1.64
AJW12_25#25	3	CGN18024_1 x CGN18024_3	1	1.64
AJW12_25#25	3	CGN18024_1 x CGN18024_3	1	0.26
AJW12_25#25	3	CGN18024_1 x CGN18024_3	1	0
AJW12_25#25	3	CGN18024_1 x CGN18024_3	1	0
AJW12_25#25	3	CGN18024_1 x CGN18024_3	1	0
AJW12_25#25	3	CGN18024_1 x CGN18024_3	2	1.27
AJW12_25#25	3	CGN18024_1 x CGN18024_3	2	1.27
AJW12_25#25	3	CGN18024_1 x CGN18024_3	2	0
AJW12_25#25	3	CGN18024_1 x CGN18024_3	2	0
AJW12_25#25	3	CGN18024_1 x CGN18024_3	2	0
AJW12_25#25	3	CGN18024_1 x CGN18024_3	2	0
AJW12_25#25	3	CGN18024_1 x CGN18024_3	3	2.28
AJW12_25#25	3	CGN18024_1 x CGN18024_3	3	1.72
AJW12_25#25	3	CGN18024_1 x CGN18024_3	3	1.72
AJW12_25#25	3	CGN18024_1 x CGN18024_3	3	1.72
AJW12_25#25	3	CGN18024_1 x CGN18024_3	3	0.74
AJW12_25#25	3	CGN18024_1 x CGN18024_3	3	0
