# Supplementary material for: Tetraose steroidal glycoalkaloids from potato provide resistance against Alternaria solani and Colorado potato beetle
Source: eLife. 2023 Sep 26;12:RP87135. doi: 10.7554/eLife.87135 (PMC10522338; doi:10.7554/eLife.87135)
Supplement: Figure 2—source data 1. [file elife-87135-fig2-data1.xlsx]

## Sheet: Figure 2-source data 1
Genotype	Plant replicate	Leaf position	Treatment	Lesion size (mm)
Atlantic	1	Upper	ScGTS	12.93
Atlantic	1	Upper	ScGTR2	10.08
Atlantic	1	Upper	ScGTR1	11.66
Atlantic	1	Upper	pK7WG2-empty	8.61
Atlantic	1	Middle	ScGTS	10.31
Atlantic	1	Middle	ScGTR2	13.08
Atlantic	1	Middle	ScGTR1	11.25
Atlantic	1	Middle	pK7WG2-empty	11.73
Atlantic	1	Lower	ScGTS	NA
Atlantic	1	Lower	ScGTR2	NA
Atlantic	1	Lower	ScGTR1	NA
Atlantic	1	Lower	pK7WG2-empty	NA
18024_3	1	Upper	ScGTS	4.62
18024_3	1	Upper	ScGTR2	3.27
18024_3	1	Upper	ScGTR1	2.46
18024_3	1	Upper	pK7WG2-empty	3.41
18024_3	1	Middle	ScGTS	6.25
18024_3	1	Middle	ScGTR2	1.72
18024_3	1	Middle	ScGTR1	0.02
18024_3	1	Middle	pK7WG2-empty	4.08
18024_3	1	Lower	ScGTS	7.77
18024_3	1	Lower	ScGTR2	1.18
18024_3	1	Lower	ScGTR1	1.35
18024_3	1	Lower	pK7WG2-empty	8.43
18024_1	1	Upper	ScGTS	0
18024_1	1	Upper	ScGTR2	0
18024_1	1	Upper	ScGTR1	0
18024_1	1	Upper	pK7WG2-empty	0
18024_1	1	Middle	ScGTS	0
18024_1	1	Middle	ScGTR2	2.55
18024_1	1	Middle	ScGTR1	1.24
18024_1	1	Middle	pK7WG2-empty	3.32
18024_1	1	Lower	ScGTS	1.29
18024_1	1	Lower	ScGTR2	1.1
18024_1	1	Lower	ScGTR1	0.43
18024_1	1	Lower	pK7WG2-empty	0.52
Atlantic	2	Upper	ScGTS	9.22
Atlantic	2	Upper	ScGTR2	11.25
Atlantic	2	Upper	ScGTR1	8.37
Atlantic	2	Upper	pK7WG2-empty	10.83
Atlantic	2	Middle	ScGTS	8.59
Atlantic	2	Middle	ScGTR2	6.49
Atlantic	2	Middle	ScGTR1	11.92
Atlantic	2	Middle	pK7WG2-empty	10.74
Atlantic	2	Lower	ScGTS	12.19
Atlantic	2	Lower	ScGTR2	15.05
Atlantic	2	Lower	ScGTR1	12.16
Atlantic	2	Lower	pK7WG2-empty	14.31
18024_3	2	Upper	ScGTS	4.54
18024_3	2	Upper	ScGTR2	2.68
18024_3	2	Upper	ScGTR1	0.01
18024_3	2	Upper	pK7WG2-empty	5.22
18024_3	2	Middle	ScGTS	5.53
18024_3	2	Middle	ScGTR2	1.46
18024_3	2	Middle	ScGTR1	2.32
18024_3	2	Middle	pK7WG2-empty	0.03
18024_3	2	Lower	ScGTS	6.37
18024_3	2	Lower	ScGTR2	3.72
18024_3	2	Lower	ScGTR1	0.02
18024_3	2	Lower	pK7WG2-empty	1.67
18024_1	2	Upper	ScGTS	0.01
18024_1	2	Upper	ScGTR2	2.11
18024_1	2	Upper	ScGTR1	0.01
18024_1	2	Upper	pK7WG2-empty	0.01
18024_1	2	Middle	ScGTS	0.02
18024_1	2	Middle	ScGTR2	0.02
18024_1	2	Middle	ScGTR1	0.02
18024_1	2	Middle	pK7WG2-empty	0.02
18024_1	2	Lower	ScGTS	0.02
18024_1	2	Lower	ScGTR2	0.08
18024_1	2	Lower	ScGTR1	0.08
18024_1	2	Lower	pK7WG2-empty	0.08
Atlantic	3	Upper	ScGTS	7.2
Atlantic	3	Upper	ScGTR2	10.45
Atlantic	3	Upper	ScGTR1	6.58
Atlantic	3	Upper	pK7WG2-empty	11.06
Atlantic	3	Middle	ScGTS	11.76
Atlantic	3	Middle	ScGTR2	10.47
Atlantic	3	Middle	ScGTR1	15.12
Atlantic	3	Middle	pK7WG2-empty	13.4
Atlantic	3	Lower	ScGTS	NA
Atlantic	3	Lower	ScGTR2	NA
Atlantic	3	Lower	ScGTR1	NA
Atlantic	3	Lower	pK7WG2-empty	NA
18024_3	3	Upper	ScGTS	0
18024_3	3	Upper	ScGTR2	0
18024_3	3	Upper	ScGTR1	0
18024_3	3	Upper	pK7WG2-empty	0
18024_3	3	Middle	ScGTS	6.4
18024_3	3	Middle	ScGTR2	0.05
18024_3	3	Middle	ScGTR1	0.7
18024_3	3	Middle	pK7WG2-empty	4.27
18024_3	3	Lower	ScGTS	5.05
18024_3	3	Lower	ScGTR2	0
18024_3	3	Lower	ScGTR1	0
18024_3	3	Lower	pK7WG2-empty	7.68
18024_1	3	Upper	ScGTS	0
18024_1	3	Upper	ScGTR2	1.81
18024_1	3	Upper	ScGTR1	0
18024_1	3	Upper	pK7WG2-empty	1.12
18024_1	3	Middle	ScGTS	0
18024_1	3	Middle	ScGTR2	0.89
18024_1	3	Middle	ScGTR1	1.42
18024_1	3	Middle	pK7WG2-empty	1.42
18024_1	3	Lower	ScGTS	1.42
18024_1	3	Lower	ScGTR2	1.44
18024_1	3	Lower	ScGTR1	1.44
18024_1	3	Lower	pK7WG2-empty	1.44
Atlantic	4	Upper	ScGTS	12.78
Atlantic	4	Upper	ScGTR2	11.61
Atlantic	4	Upper	ScGTR1	12.13
Atlantic	4	Upper	pK7WG2-empty	12.17
Atlantic	4	Middle	ScGTS	NA
Atlantic	4	Middle	ScGTR2	NA
Atlantic	4	Middle	ScGTR1	NA
Atlantic	4	Middle	pK7WG2-empty	NA
Atlantic	4	Lower	ScGTS	NA
Atlantic	4	Lower	ScGTR2	NA
Atlantic	4	Lower	ScGTR1	NA
Atlantic	4	Lower	pK7WG2-empty	NA
18024_3	4	Upper	ScGTS	0
18024_3	4	Upper	ScGTR2	2.27
18024_3	4	Upper	ScGTR1	1.34
18024_3	4	Upper	pK7WG2-empty	1.05
18024_3	4	Middle	ScGTS	3.66
18024_3	4	Middle	ScGTR2	4.48
18024_3	4	Middle	ScGTR1	0
18024_3	4	Middle	pK7WG2-empty	7.97
18024_3	4	Lower	ScGTS	5.47
18024_3	4	Lower	ScGTR2	0
18024_3	4	Lower	ScGTR1	2.1
18024_3	4	Lower	pK7WG2-empty	0
18024_1	4	Upper	ScGTS	0
18024_1	4	Upper	ScGTR2	0
18024_1	4	Upper	ScGTR1	0
18024_1	4	Upper	pK7WG2-empty	0
18024_1	4	Middle	ScGTS	0
18024_1	4	Middle	ScGTR2	0
18024_1	4	Middle	ScGTR1	0
18024_1	4	Middle	pK7WG2-empty	0
18024_1	4	Lower	ScGTS	0
18024_1	4	Lower	ScGTR2	0
18024_1	4	Lower	ScGTR1	0
18024_1	4	Lower	pK7WG2-empty	0
18024_3	5	Upper	ScGTS	6.09
18024_3	5	Upper	ScGTR2	0.75
18024_3	5	Upper	ScGTR1	2.72
18024_3	5	Upper	pK7WG2-empty	4.02
18024_3	5	Middle	ScGTS	3.39
18024_3	5	Middle	ScGTR2	0
18024_3	5	Middle	ScGTR1	0
18024_3	5	Middle	pK7WG2-empty	4.43
18024_3	5	Lower	ScGTS	3.15
18024_3	5	Lower	ScGTR2	1.41
18024_3	5	Lower	ScGTR1	0
18024_3	5	Lower	pK7WG2-empty	1.04
18024_1	5	Upper	ScGTS	0
18024_1	5	Upper	ScGTR2	0
18024_1	5	Upper	ScGTR1	0
18024_1	5	Upper	pK7WG2-empty	0
18024_1	5	Middle	ScGTS	0
18024_1	5	Middle	ScGTR2	0
18024_1	5	Middle	ScGTR1	0
18024_1	5	Middle	pK7WG2-empty	0
18024_1	5	Lower	ScGTS	0
18024_1	5	Lower	ScGTR2	0
18024_1	5	Lower	ScGTR1	0
18024_1	5	Lower	pK7WG2-empty	0
Atlantic	5	Upper	ScGTS	9.03
Atlantic	5	Upper	ScGTR2	8.97
Atlantic	5	Upper	ScGTR1	10.63
Atlantic	5	Upper	pK7WG2-empty	9.4
Atlantic	5	Middle	ScGTS	NA
Atlantic	5	Middle	ScGTR2	NA
Atlantic	5	Middle	ScGTR1	NA
Atlantic	5	Middle	pK7WG2-empty	NA
Atlantic	5	Lower	ScGTS	NA
Atlantic	5	Lower	ScGTR2	NA
Atlantic	5	Lower	ScGTR1	NA
Atlantic	5	Lower	pK7WG2-empty	NA
18024_3	6	Upper	ScGTS	4.67
18024_3	6	Upper	ScGTR2	2.59
18024_3	6	Upper	ScGTR1	0
18024_3	6	Upper	pK7WG2-empty	0
18024_3	6	Middle	ScGTS	4.45
18024_3	6	Middle	ScGTR2	3.35
18024_3	6	Middle	ScGTR1	0
18024_3	6	Middle	pK7WG2-empty	3.81
18024_3	6	Lower	ScGTS	5.21
18024_3	6	Lower	ScGTR2	1.59
18024_3	6	Lower	ScGTR1	1.59
18024_3	6	Lower	pK7WG2-empty	1.59
18024_1	6	Upper	ScGTS	0
18024_1	6	Upper	ScGTR2	0
18024_1	6	Upper	ScGTR1	0.01
18024_1	6	Upper	pK7WG2-empty	0.01
18024_1	6	Middle	ScGTS	0.01
18024_1	6	Middle	ScGTR2	0.01
18024_1	6	Middle	ScGTR1	0.01
18024_1	6	Middle	pK7WG2-empty	2.27
18024_1	6	Lower	ScGTS	0
18024_1	6	Lower	ScGTR2	0
18024_1	6	Lower	ScGTR1	0
18024_1	6	Lower	pK7WG2-empty	0
Atlantic	6	Upper	ScGTS	9.29
Atlantic	6	Upper	ScGTR2	12.15
Atlantic	6	Upper	ScGTR1	10.48
Atlantic	6	Upper	pK7WG2-empty	12.48
Atlantic	6	Middle	ScGTS	14.51
Atlantic	6	Middle	ScGTR2	17.16
Atlantic	6	Middle	ScGTR1	12.24
Atlantic	6	Middle	pK7WG2-empty	11.15
Atlantic	6	Lower	ScGTS	NA
Atlantic	6	Lower	ScGTR2	NA
Atlantic	6	Lower	ScGTR1	NA
Atlantic	6	Lower	pK7WG2-empty	NA
18024_3	7	Upper	ScGTS	5.04
18024_3	7	Upper	ScGTR2	0
18024_3	7	Upper	ScGTR1	2.57
18024_3	7	Upper	pK7WG2-empty	5.57
18024_3	7	Middle	ScGTS	5.5
18024_3	7	Middle	ScGTR2	3.91
18024_3	7	Middle	ScGTR1	2.37
18024_3	7	Middle	pK7WG2-empty	4.78
18024_3	7	Lower	ScGTS	5.42
18024_3	7	Lower	ScGTR2	2.81
18024_3	7	Lower	ScGTR1	0.81
18024_3	7	Lower	pK7WG2-empty	4.56
18024_1	7	Upper	ScGTS	1.82
18024_1	7	Upper	ScGTR2	0.04
18024_1	7	Upper	ScGTR1	3.92
18024_1	7	Upper	pK7WG2-empty	3.21
18024_1	7	Middle	ScGTS	0.03
18024_1	7	Middle	ScGTR2	1.85
18024_1	7	Middle	ScGTR1	0.03
18024_1	7	Middle	pK7WG2-empty	1.85
18024_1	7	Lower	ScGTS	0.02
18024_1	7	Lower	ScGTR2	0.03
18024_1	7	Lower	ScGTR1	0.03
18024_1	7	Lower	pK7WG2-empty	0.03
Atlantic	7	Upper	ScGTS	7.4
Atlantic	7	Upper	ScGTR2	7.53
Atlantic	7	Upper	ScGTR1	10.68
Atlantic	7	Upper	pK7WG2-empty	9.75
Atlantic	7	Middle	ScGTS	14.62
Atlantic	7	Middle	ScGTR2	16.39
Atlantic	7	Middle	ScGTR1	14.52
Atlantic	7	Middle	pK7WG2-empty	15.71
Atlantic	7	Lower	ScGTS	16.65
Atlantic	7	Lower	ScGTR2	14.22
Atlantic	7	Lower	ScGTR1	16.65
Atlantic	7	Lower	pK7WG2-empty	16.65
18024_3	8	Upper	ScGTS	6.05
18024_3	8	Upper	ScGTR2	3.99
18024_3	8	Upper	ScGTR1	0.03
18024_3	8	Upper	pK7WG2-empty	9.1
18024_3	8	Middle	ScGTS	8.16
18024_3	8	Middle	ScGTR2	3.64
18024_3	8	Middle	ScGTR1	0.04
18024_3	8	Middle	pK7WG2-empty	7.62
18024_3	8	Lower	ScGTS	9.5
18024_3	8	Lower	ScGTR2	3.79
18024_3	8	Lower	ScGTR1	0.87
18024_3	8	Lower	pK7WG2-empty	8.14
