# Supplementary material for: Tetraose steroidal glycoalkaloids from potato provide resistance against Alternaria solani and Colorado potato beetle
Source: eLife. 2023 Sep 26;12:RP87135. doi: 10.7554/eLife.87135 (PMC10522338; doi:10.7554/eLife.87135)
Supplement: Figure 4—source data 1. [file elife-87135-fig4-data1.xlsx]

## Sheet: Figure 4-source data 1
Genotype	Sample weight (mg)	SGA	Intensity
18024_3 ScGTR1#1	89	1. a-Chaconine (Solanidine-Glu-Rha-Rha)	1500
18024_3 ScGTR1#1	80	1. a-Chaconine (Solanidine-Glu-Rha-Rha)	2500
18024_3 ScGTR1#1	100	1. a-Chaconine (Solanidine-Glu-Rha-Rha)	1500
18024_3 ScGTR1#2	106	1. a-Chaconine (Solanidine-Glu-Rha-Rha)	2500
18024_3 ScGTR1#2	101	1. a-Chaconine (Solanidine-Glu-Rha-Rha)	1500
18024_3 ScGTR1#2	98	1. a-Chaconine (Solanidine-Glu-Rha-Rha)	19976
18024_3 ScGTR1#3	98	1. a-Chaconine (Solanidine-Glu-Rha-Rha)	1500
18024_3 ScGTR1#3	84	1. a-Chaconine (Solanidine-Glu-Rha-Rha)	2500
18024_3 ScGTR1#5	94	1. a-Chaconine (Solanidine-Glu-Rha-Rha)	1500
18024_3 ScGTR1#5	89	1. a-Chaconine (Solanidine-Glu-Rha-Rha)	2500
18024_3 ScGTR1#5	105	1. a-Chaconine (Solanidine-Glu-Rha-Rha)	1500
18024_3 ScGTR1#6	88	1. a-Chaconine (Solanidine-Glu-Rha-Rha)	2500
18024_3 ScGTR1#6	124	1. a-Chaconine (Solanidine-Glu-Rha-Rha)	1500
18024_3 ScGTR1#6	94	1. a-Chaconine (Solanidine-Glu-Rha-Rha)	2500
18024_3 ScGTR1#9	86	1. a-Chaconine (Solanidine-Glu-Rha-Rha)	3797
18024_3 ScGTR1#9	89	1. a-Chaconine (Solanidine-Glu-Rha-Rha)	8536
18024_3 ScGTR1#9	98	1. a-Chaconine (Solanidine-Glu-Rha-Rha)	2538
18024_3 ScGTR2#11	130	1. a-Chaconine (Solanidine-Glu-Rha-Rha)	13111
18024_3 ScGTR2#11	96	1. a-Chaconine (Solanidine-Glu-Rha-Rha)	7877
18024_3 ScGTR2#13	110	1. a-Chaconine (Solanidine-Glu-Rha-Rha)	9123
18024_3 ScGTR2#13	95	1. a-Chaconine (Solanidine-Glu-Rha-Rha)	9564
18024_3 ScGTR2#13	145	1. a-Chaconine (Solanidine-Glu-Rha-Rha)	5473
18024_3 ScGTR2#17	94	1. a-Chaconine (Solanidine-Glu-Rha-Rha)	24047
18024_3 ScGTR2#17	97	1. a-Chaconine (Solanidine-Glu-Rha-Rha)	42720
18024_3 ScGTR2#17	85	1. a-Chaconine (Solanidine-Glu-Rha-Rha)	37865
18024_3 ScGTR2#19	95	1. a-Chaconine (Solanidine-Glu-Rha-Rha)	32981
18024_3 ScGTR2#19	95	1. a-Chaconine (Solanidine-Glu-Rha-Rha)	30638
18024_3 ScGTR2#19	95	1. a-Chaconine (Solanidine-Glu-Rha-Rha)	18391
18024_3 ScGTR2#22	100	1. a-Chaconine (Solanidine-Glu-Rha-Rha)	20108
18024_3 ScGTR2#22	119	1. a-Chaconine (Solanidine-Glu-Rha-Rha)	29159
18024_3 ScGTR2#22	111	1. a-Chaconine (Solanidine-Glu-Rha-Rha)	39388
18024_3 ScGTR2#6	92	1. a-Chaconine (Solanidine-Glu-Rha-Rha)	10212
18024_3 ScGTR2#6	106	1. a-Chaconine (Solanidine-Glu-Rha-Rha)	6522
18024_3 ScGTR2#6	107	1. a-Chaconine (Solanidine-Glu-Rha-Rha)	14467
18024_3 ScGTR2#7	88	1. a-Chaconine (Solanidine-Glu-Rha-Rha)	5982
18024_3 ScGTR2#7	96	1. a-Chaconine (Solanidine-Glu-Rha-Rha)	5095
18024_3 ScGTR2#7	102	1. a-Chaconine (Solanidine-Glu-Rha-Rha)	7900
18024_3 ScGTR2#9	91	1. a-Chaconine (Solanidine-Glu-Rha-Rha)	10073
18024_3 ScGTR2#9	121	1. a-Chaconine (Solanidine-Glu-Rha-Rha)	11283
18024_3 ScGTR2#9	114	1. a-Chaconine (Solanidine-Glu-Rha-Rha)	11819
Atlantic	115	1. a-Chaconine (Solanidine-Glu-Rha-Rha)	310053
Atlantic	93	1. a-Chaconine (Solanidine-Glu-Rha-Rha)	325668
Atlantic	106	1. a-Chaconine (Solanidine-Glu-Rha-Rha)	243384
Atlantic	102	1. a-Chaconine (Solanidine-Glu-Rha-Rha)	355694
Atlantic	120	1. a-Chaconine (Solanidine-Glu-Rha-Rha)	250757
CGN18024_1	93	1. a-Chaconine (Solanidine-Glu-Rha-Rha)	5111
CGN18024_1	120	1. a-Chaconine (Solanidine-Glu-Rha-Rha)	6744
CGN18024_1	91	1. a-Chaconine (Solanidine-Glu-Rha-Rha)	2500
CGN18024_3	105	1. a-Chaconine (Solanidine-Glu-Rha-Rha)	56313
CGN18024_3	104	1. a-Chaconine (Solanidine-Glu-Rha-Rha)	33320
CGN18024_3	88	1. a-Chaconine (Solanidine-Glu-Rha-Rha)	61538
18024_3 ScGTR1#1	89	2. a-Solanine (Solanidine-Gal-Glu-Rha)	1500
18024_3 ScGTR1#1	80	2. a-Solanine (Solanidine-Gal-Glu-Rha)	2500
18024_3 ScGTR1#1	100	2. a-Solanine (Solanidine-Gal-Glu-Rha)	1500
18024_3 ScGTR1#2	106	2. a-Solanine (Solanidine-Gal-Glu-Rha)	2500
18024_3 ScGTR1#2	101	2. a-Solanine (Solanidine-Gal-Glu-Rha)	3809
18024_3 ScGTR1#2	98	2. a-Solanine (Solanidine-Gal-Glu-Rha)	6513
18024_3 ScGTR1#3	98	2. a-Solanine (Solanidine-Gal-Glu-Rha)	1500
18024_3 ScGTR1#3	84	2. a-Solanine (Solanidine-Gal-Glu-Rha)	2500
18024_3 ScGTR1#5	94	2. a-Solanine (Solanidine-Gal-Glu-Rha)	1500
18024_3 ScGTR1#5	89	2. a-Solanine (Solanidine-Gal-Glu-Rha)	2500
18024_3 ScGTR1#5	105	2. a-Solanine (Solanidine-Gal-Glu-Rha)	1500
18024_3 ScGTR1#6	88	2. a-Solanine (Solanidine-Gal-Glu-Rha)	2500
18024_3 ScGTR1#6	124	2. a-Solanine (Solanidine-Gal-Glu-Rha)	1500
18024_3 ScGTR1#6	94	2. a-Solanine (Solanidine-Gal-Glu-Rha)	2500
18024_3 ScGTR1#9	86	2. a-Solanine (Solanidine-Gal-Glu-Rha)	1500
18024_3 ScGTR1#9	89	2. a-Solanine (Solanidine-Gal-Glu-Rha)	2500
18024_3 ScGTR1#9	98	2. a-Solanine (Solanidine-Gal-Glu-Rha)	1500
18024_3 ScGTR2#11	130	2. a-Solanine (Solanidine-Gal-Glu-Rha)	2500
18024_3 ScGTR2#11	96	2. a-Solanine (Solanidine-Gal-Glu-Rha)	1500
18024_3 ScGTR2#13	110	2. a-Solanine (Solanidine-Gal-Glu-Rha)	2500
18024_3 ScGTR2#13	95	2. a-Solanine (Solanidine-Gal-Glu-Rha)	1500
18024_3 ScGTR2#13	145	2. a-Solanine (Solanidine-Gal-Glu-Rha)	2500
18024_3 ScGTR2#17	94	2. a-Solanine (Solanidine-Gal-Glu-Rha)	1500
18024_3 ScGTR2#17	97	2. a-Solanine (Solanidine-Gal-Glu-Rha)	2500
18024_3 ScGTR2#17	85	2. a-Solanine (Solanidine-Gal-Glu-Rha)	1500
18024_3 ScGTR2#19	95	2. a-Solanine (Solanidine-Gal-Glu-Rha)	2500
18024_3 ScGTR2#19	95	2. a-Solanine (Solanidine-Gal-Glu-Rha)	1500
18024_3 ScGTR2#19	95	2. a-Solanine (Solanidine-Gal-Glu-Rha)	2500
18024_3 ScGTR2#22	100	2. a-Solanine (Solanidine-Gal-Glu-Rha)	1500
18024_3 ScGTR2#22	119	2. a-Solanine (Solanidine-Gal-Glu-Rha)	2500
18024_3 ScGTR2#22	111	2. a-Solanine (Solanidine-Gal-Glu-Rha)	1500
18024_3 ScGTR2#6	92	2. a-Solanine (Solanidine-Gal-Glu-Rha)	2500
18024_3 ScGTR2#6	106	2. a-Solanine (Solanidine-Gal-Glu-Rha)	1500
18024_3 ScGTR2#6	107	2. a-Solanine (Solanidine-Gal-Glu-Rha)	2500
18024_3 ScGTR2#7	88	2. a-Solanine (Solanidine-Gal-Glu-Rha)	1500
18024_3 ScGTR2#7	96	2. a-Solanine (Solanidine-Gal-Glu-Rha)	2500
18024_3 ScGTR2#7	102	2. a-Solanine (Solanidine-Gal-Glu-Rha)	1500
18024_3 ScGTR2#9	91	2. a-Solanine (Solanidine-Gal-Glu-Rha)	2500
18024_3 ScGTR2#9	121	2. a-Solanine (Solanidine-Gal-Glu-Rha)	1500
18024_3 ScGTR2#9	114	2. a-Solanine (Solanidine-Gal-Glu-Rha)	2500
Atlantic	115	2. a-Solanine (Solanidine-Gal-Glu-Rha)	1244897
Atlantic	93	2. a-Solanine (Solanidine-Gal-Glu-Rha)	1269741
Atlantic	106	2. a-Solanine (Solanidine-Gal-Glu-Rha)	1052039
Atlantic	102	2. a-Solanine (Solanidine-Gal-Glu-Rha)	1388798
Atlantic	120	2. a-Solanine (Solanidine-Gal-Glu-Rha)	940436
CGN18024_1	93	2. a-Solanine (Solanidine-Gal-Glu-Rha)	1500
CGN18024_1	120	2. a-Solanine (Solanidine-Gal-Glu-Rha)	2500
CGN18024_1	91	2. a-Solanine (Solanidine-Gal-Glu-Rha)	1500
CGN18024_3	105	2. a-Solanine (Solanidine-Gal-Glu-Rha)	2500
CGN18024_3	104	2. a-Solanine (Solanidine-Gal-Glu-Rha)	1500
CGN18024_3	88	2. a-Solanine (Solanidine-Gal-Glu-Rha)	2500
18024_3 ScGTR1#1	89	3. Solanidine-Gal-Glu-Glu	392302
18024_3 ScGTR1#1	80	3. Solanidine-Gal-Glu-Glu	285861
18024_3 ScGTR1#1	100	3. Solanidine-Gal-Glu-Glu	25488
18024_3 ScGTR1#2	106	3. Solanidine-Gal-Glu-Glu	434764
18024_3 ScGTR1#2	101	3. Solanidine-Gal-Glu-Glu	787265
18024_3 ScGTR1#2	98	3. Solanidine-Gal-Glu-Glu	1208446
18024_3 ScGTR1#3	98	3. Solanidine-Gal-Glu-Glu	15874
18024_3 ScGTR1#3	84	3. Solanidine-Gal-Glu-Glu	16621
18024_3 ScGTR1#5	94	3. Solanidine-Gal-Glu-Glu	9118
18024_3 ScGTR1#5	89	3. Solanidine-Gal-Glu-Glu	5323
18024_3 ScGTR1#5	105	3. Solanidine-Gal-Glu-Glu	6486
18024_3 ScGTR1#6	88	3. Solanidine-Gal-Glu-Glu	11901
18024_3 ScGTR1#6	124	3. Solanidine-Gal-Glu-Glu	14857
18024_3 ScGTR1#6	94	3. Solanidine-Gal-Glu-Glu	8083
18024_3 ScGTR1#9	86	3. Solanidine-Gal-Glu-Glu	69584
18024_3 ScGTR1#9	89	3. Solanidine-Gal-Glu-Glu	152425
18024_3 ScGTR1#9	98	3. Solanidine-Gal-Glu-Glu	69194
18024_3 ScGTR2#11	130	3. Solanidine-Gal-Glu-Glu	1217449
18024_3 ScGTR2#11	96	3. Solanidine-Gal-Glu-Glu	191503
18024_3 ScGTR2#13	110	3. Solanidine-Gal-Glu-Glu	141343
18024_3 ScGTR2#13	95	3. Solanidine-Gal-Glu-Glu	78738
18024_3 ScGTR2#13	145	3. Solanidine-Gal-Glu-Glu	52351
18024_3 ScGTR2#17	94	3. Solanidine-Gal-Glu-Glu	1902700
18024_3 ScGTR2#17	97	3. Solanidine-Gal-Glu-Glu	1639747
18024_3 ScGTR2#17	85	3. Solanidine-Gal-Glu-Glu	1769022
18024_3 ScGTR2#19	95	3. Solanidine-Gal-Glu-Glu	1998446
18024_3 ScGTR2#19	95	3. Solanidine-Gal-Glu-Glu	1683545
18024_3 ScGTR2#19	95	3. Solanidine-Gal-Glu-Glu	1432429
18024_3 ScGTR2#22	100	3. Solanidine-Gal-Glu-Glu	1332613
18024_3 ScGTR2#22	119	3. Solanidine-Gal-Glu-Glu	1413426
18024_3 ScGTR2#22	111	3. Solanidine-Gal-Glu-Glu	1732260
18024_3 ScGTR2#6	92	3. Solanidine-Gal-Glu-Glu	984359
18024_3 ScGTR2#6	106	3. Solanidine-Gal-Glu-Glu	209034
18024_3 ScGTR2#6	107	3. Solanidine-Gal-Glu-Glu	342152
18024_3 ScGTR2#7	88	3. Solanidine-Gal-Glu-Glu	100885
18024_3 ScGTR2#7	96	3. Solanidine-Gal-Glu-Glu	169771
18024_3 ScGTR2#7	102	3. Solanidine-Gal-Glu-Glu	228122
18024_3 ScGTR2#9	91	3. Solanidine-Gal-Glu-Glu	255157
18024_3 ScGTR2#9	121	3. Solanidine-Gal-Glu-Glu	204610
18024_3 ScGTR2#9	114	3. Solanidine-Gal-Glu-Glu	1297242
Atlantic	115	3. Solanidine-Gal-Glu-Glu	13854
Atlantic	93	3. Solanidine-Gal-Glu-Glu	11729
Atlantic	106	3. Solanidine-Gal-Glu-Glu	1500
Atlantic	102	3. Solanidine-Gal-Glu-Glu	10901
Atlantic	120	3. Solanidine-Gal-Glu-Glu	2528
CGN18024_1	93	3. Solanidine-Gal-Glu-Glu	48053
CGN18024_1	120	3. Solanidine-Gal-Glu-Glu	50195
CGN18024_1	91	3. Solanidine-Gal-Glu-Glu	40165
CGN18024_3	105	3. Solanidine-Gal-Glu-Glu	1911411
CGN18024_3	104	3. Solanidine-Gal-Glu-Glu	1835352
CGN18024_3	88	3. Solanidine-Gal-Glu-Glu	2100734
18024_3 ScGTR1#1	89	4. Demissidine-Gal-Glu-Glu	60320
18024_3 ScGTR1#1	80	4. Demissidine-Gal-Glu-Glu	52900
18024_3 ScGTR1#1	100	4. Demissidine-Gal-Glu-Glu	1500
18024_3 ScGTR1#2	106	4. Demissidine-Gal-Glu-Glu	177157
18024_3 ScGTR1#2	101	4. Demissidine-Gal-Glu-Glu	290870
18024_3 ScGTR1#2	98	4. Demissidine-Gal-Glu-Glu	573018
18024_3 ScGTR1#3	98	4. Demissidine-Gal-Glu-Glu	3617
18024_3 ScGTR1#3	84	4. Demissidine-Gal-Glu-Glu	2500
18024_3 ScGTR1#5	94	4. Demissidine-Gal-Glu-Glu	2500
18024_3 ScGTR1#5	89	4. Demissidine-Gal-Glu-Glu	2500
18024_3 ScGTR1#5	105	4. Demissidine-Gal-Glu-Glu	2500
18024_3 ScGTR1#6	88	4. Demissidine-Gal-Glu-Glu	2500
18024_3 ScGTR1#6	124	4. Demissidine-Gal-Glu-Glu	2500
18024_3 ScGTR1#6	94	4. Demissidine-Gal-Glu-Glu	2500
18024_3 ScGTR1#9	86	4. Demissidine-Gal-Glu-Glu	10206
18024_3 ScGTR1#9	89	4. Demissidine-Gal-Glu-Glu	36799
18024_3 ScGTR1#9	98	4. Demissidine-Gal-Glu-Glu	10617
18024_3 ScGTR2#11	130	4. Demissidine-Gal-Glu-Glu	225849
18024_3 ScGTR2#11	96	4. Demissidine-Gal-Glu-Glu	26997
18024_3 ScGTR2#13	110	4. Demissidine-Gal-Glu-Glu	15826
18024_3 ScGTR2#13	95	4. Demissidine-Gal-Glu-Glu	13333
18024_3 ScGTR2#13	145	4. Demissidine-Gal-Glu-Glu	5821
18024_3 ScGTR2#17	94	4. Demissidine-Gal-Glu-Glu	745612
18024_3 ScGTR2#17	97	4. Demissidine-Gal-Glu-Glu	572761
18024_3 ScGTR2#17	85	4. Demissidine-Gal-Glu-Glu	688899
18024_3 ScGTR2#19	95	4. Demissidine-Gal-Glu-Glu	959275
18024_3 ScGTR2#19	95	4. Demissidine-Gal-Glu-Glu	489367
18024_3 ScGTR2#19	95	4. Demissidine-Gal-Glu-Glu	476015
18024_3 ScGTR2#22	100	4. Demissidine-Gal-Glu-Glu	157030
18024_3 ScGTR2#22	119	4. Demissidine-Gal-Glu-Glu	242306
18024_3 ScGTR2#22	111	4. Demissidine-Gal-Glu-Glu	174080
18024_3 ScGTR2#6	92	4. Demissidine-Gal-Glu-Glu	148408
18024_3 ScGTR2#6	106	4. Demissidine-Gal-Glu-Glu	33859
18024_3 ScGTR2#6	107	4. Demissidine-Gal-Glu-Glu	51895
18024_3 ScGTR2#7	88	4. Demissidine-Gal-Glu-Glu	15041
18024_3 ScGTR2#7	96	4. Demissidine-Gal-Glu-Glu	14694
18024_3 ScGTR2#7	102	4. Demissidine-Gal-Glu-Glu	35690
18024_3 ScGTR2#9	91	4. Demissidine-Gal-Glu-Glu	36754
18024_3 ScGTR2#9	121	4. Demissidine-Gal-Glu-Glu	34921
18024_3 ScGTR2#9	114	4. Demissidine-Gal-Glu-Glu	226012
Atlantic	115	4. Demissidine-Gal-Glu-Glu	24565
Atlantic	93	4. Demissidine-Gal-Glu-Glu	28279
Atlantic	106	4. Demissidine-Gal-Glu-Glu	23593
Atlantic	102	4. Demissidine-Gal-Glu-Glu	31887
Atlantic	120	4. Demissidine-Gal-Glu-Glu	24610
CGN18024_1	93	4. Demissidine-Gal-Glu-Glu	5598
CGN18024_1	120	4. Demissidine-Gal-Glu-Glu	7121
CGN18024_1	91	4. Demissidine-Gal-Glu-Glu	2500
CGN18024_3	105	4. Demissidine-Gal-Glu-Glu	869318
CGN18024_3	104	4. Demissidine-Gal-Glu-Glu	1117881
CGN18024_3	88	4. Demissidine-Gal-Glu-Glu	1074705
18024_3 ScGTR1#1	89	5. Dehydrocommersonine (Solanidine-Gal-Glu-Glu-Glu)	1722301
18024_3 ScGTR1#1	80	5. Dehydrocommersonine (Solanidine-Gal-Glu-Glu-Glu)	1715966
18024_3 ScGTR1#1	100	5. Dehydrocommersonine (Solanidine-Gal-Glu-Glu-Glu)	1639020
18024_3 ScGTR1#2	106	5. Dehydrocommersonine (Solanidine-Gal-Glu-Glu-Glu)	1691542
18024_3 ScGTR1#2	101	5. Dehydrocommersonine (Solanidine-Gal-Glu-Glu-Glu)	1763286
18024_3 ScGTR1#2	98	5. Dehydrocommersonine (Solanidine-Gal-Glu-Glu-Glu)	1454923
18024_3 ScGTR1#3	98	5. Dehydrocommersonine (Solanidine-Gal-Glu-Glu-Glu)	1745224
18024_3 ScGTR1#3	84	5. Dehydrocommersonine (Solanidine-Gal-Glu-Glu-Glu)	1730140
18024_3 ScGTR1#5	94	5. Dehydrocommersonine (Solanidine-Gal-Glu-Glu-Glu)	1712809
18024_3 ScGTR1#5	89	5. Dehydrocommersonine (Solanidine-Gal-Glu-Glu-Glu)	1786722
18024_3 ScGTR1#5	105	5. Dehydrocommersonine (Solanidine-Gal-Glu-Glu-Glu)	1894649
18024_3 ScGTR1#6	88	5. Dehydrocommersonine (Solanidine-Gal-Glu-Glu-Glu)	1944054
18024_3 ScGTR1#6	124	5. Dehydrocommersonine (Solanidine-Gal-Glu-Glu-Glu)	2136591
18024_3 ScGTR1#6	94	5. Dehydrocommersonine (Solanidine-Gal-Glu-Glu-Glu)	2057565
18024_3 ScGTR1#9	86	5. Dehydrocommersonine (Solanidine-Gal-Glu-Glu-Glu)	1720801
18024_3 ScGTR1#9	89	5. Dehydrocommersonine (Solanidine-Gal-Glu-Glu-Glu)	2207632
18024_3 ScGTR1#9	98	5. Dehydrocommersonine (Solanidine-Gal-Glu-Glu-Glu)	1880363
18024_3 ScGTR2#11	130	5. Dehydrocommersonine (Solanidine-Gal-Glu-Glu-Glu)	324553
18024_3 ScGTR2#11	96	5. Dehydrocommersonine (Solanidine-Gal-Glu-Glu-Glu)	352332
18024_3 ScGTR2#13	110	5. Dehydrocommersonine (Solanidine-Gal-Glu-Glu-Glu)	347147
18024_3 ScGTR2#13	95	5. Dehydrocommersonine (Solanidine-Gal-Glu-Glu-Glu)	249310
18024_3 ScGTR2#13	145	5. Dehydrocommersonine (Solanidine-Gal-Glu-Glu-Glu)	286068
18024_3 ScGTR2#17	94	5. Dehydrocommersonine (Solanidine-Gal-Glu-Glu-Glu)	14968
18024_3 ScGTR2#17	97	5. Dehydrocommersonine (Solanidine-Gal-Glu-Glu-Glu)	12988
18024_3 ScGTR2#17	85	5. Dehydrocommersonine (Solanidine-Gal-Glu-Glu-Glu)	12947
18024_3 ScGTR2#19	95	5. Dehydrocommersonine (Solanidine-Gal-Glu-Glu-Glu)	17816
18024_3 ScGTR2#19	95	5. Dehydrocommersonine (Solanidine-Gal-Glu-Glu-Glu)	37071
18024_3 ScGTR2#19	95	5. Dehydrocommersonine (Solanidine-Gal-Glu-Glu-Glu)	60337
18024_3 ScGTR2#22	100	5. Dehydrocommersonine (Solanidine-Gal-Glu-Glu-Glu)	234827
18024_3 ScGTR2#22	119	5. Dehydrocommersonine (Solanidine-Gal-Glu-Glu-Glu)	202794
18024_3 ScGTR2#22	111	5. Dehydrocommersonine (Solanidine-Gal-Glu-Glu-Glu)	221218
18024_3 ScGTR2#6	92	5. Dehydrocommersonine (Solanidine-Gal-Glu-Glu-Glu)	293108
18024_3 ScGTR2#6	106	5. Dehydrocommersonine (Solanidine-Gal-Glu-Glu-Glu)	415399
18024_3 ScGTR2#6	107	5. Dehydrocommersonine (Solanidine-Gal-Glu-Glu-Glu)	255408
18024_3 ScGTR2#7	88	5. Dehydrocommersonine (Solanidine-Gal-Glu-Glu-Glu)	308894
18024_3 ScGTR2#7	96	5. Dehydrocommersonine (Solanidine-Gal-Glu-Glu-Glu)	227045
18024_3 ScGTR2#7	102	5. Dehydrocommersonine (Solanidine-Gal-Glu-Glu-Glu)	319513
18024_3 ScGTR2#9	91	5. Dehydrocommersonine (Solanidine-Gal-Glu-Glu-Glu)	182354
18024_3 ScGTR2#9	121	5. Dehydrocommersonine (Solanidine-Gal-Glu-Glu-Glu)	255370
18024_3 ScGTR2#9	114	5. Dehydrocommersonine (Solanidine-Gal-Glu-Glu-Glu)	375014
Atlantic	115	5. Dehydrocommersonine (Solanidine-Gal-Glu-Glu-Glu)	2500
Atlantic	93	5. Dehydrocommersonine (Solanidine-Gal-Glu-Glu-Glu)	2500
Atlantic	106	5. Dehydrocommersonine (Solanidine-Gal-Glu-Glu-Glu)	2500
Atlantic	102	5. Dehydrocommersonine (Solanidine-Gal-Glu-Glu-Glu)	2500
Atlantic	120	5. Dehydrocommersonine (Solanidine-Gal-Glu-Glu-Glu)	2500
CGN18024_1	93	5. Dehydrocommersonine (Solanidine-Gal-Glu-Glu-Glu)	1642157
CGN18024_1	120	5. Dehydrocommersonine (Solanidine-Gal-Glu-Glu-Glu)	1514209
CGN18024_1	91	5. Dehydrocommersonine (Solanidine-Gal-Glu-Glu-Glu)	1723831
CGN18024_3	105	5. Dehydrocommersonine (Solanidine-Gal-Glu-Glu-Glu)	36976
CGN18024_3	104	5. Dehydrocommersonine (Solanidine-Gal-Glu-Glu-Glu)	16690
CGN18024_3	88	5. Dehydrocommersonine (Solanidine-Gal-Glu-Glu-Glu)	11194
18024_3 ScGTR1#1	89	6. Commersonine (Dihydrosolanidine-Gal-Glu-Glu-Glu)	791603
18024_3 ScGTR1#1	80	6. Commersonine (Dihydrosolanidine-Gal-Glu-Glu-Glu)	804114
18024_3 ScGTR1#1	100	6. Commersonine (Dihydrosolanidine-Gal-Glu-Glu-Glu)	642228
18024_3 ScGTR1#2	106	6. Commersonine (Dihydrosolanidine-Gal-Glu-Glu-Glu)	972909
18024_3 ScGTR1#2	101	6. Commersonine (Dihydrosolanidine-Gal-Glu-Glu-Glu)	724938
18024_3 ScGTR1#2	98	6. Commersonine (Dihydrosolanidine-Gal-Glu-Glu-Glu)	676046
18024_3 ScGTR1#3	98	6. Commersonine (Dihydrosolanidine-Gal-Glu-Glu-Glu)	601827
18024_3 ScGTR1#3	84	6. Commersonine (Dihydrosolanidine-Gal-Glu-Glu-Glu)	515085
18024_3 ScGTR1#5	94	6. Commersonine (Dihydrosolanidine-Gal-Glu-Glu-Glu)	354019
18024_3 ScGTR1#5	89	6. Commersonine (Dihydrosolanidine-Gal-Glu-Glu-Glu)	556301
18024_3 ScGTR1#5	105	6. Commersonine (Dihydrosolanidine-Gal-Glu-Glu-Glu)	513199
18024_3 ScGTR1#6	88	6. Commersonine (Dihydrosolanidine-Gal-Glu-Glu-Glu)	720623
18024_3 ScGTR1#6	124	6. Commersonine (Dihydrosolanidine-Gal-Glu-Glu-Glu)	875125
18024_3 ScGTR1#6	94	6. Commersonine (Dihydrosolanidine-Gal-Glu-Glu-Glu)	673434
18024_3 ScGTR1#9	86	6. Commersonine (Dihydrosolanidine-Gal-Glu-Glu-Glu)	898638
18024_3 ScGTR1#9	89	6. Commersonine (Dihydrosolanidine-Gal-Glu-Glu-Glu)	900827
18024_3 ScGTR1#9	98	6. Commersonine (Dihydrosolanidine-Gal-Glu-Glu-Glu)	831904
18024_3 ScGTR2#11	130	6. Commersonine (Dihydrosolanidine-Gal-Glu-Glu-Glu)	85377
18024_3 ScGTR2#11	96	6. Commersonine (Dihydrosolanidine-Gal-Glu-Glu-Glu)	72631
18024_3 ScGTR2#13	110	6. Commersonine (Dihydrosolanidine-Gal-Glu-Glu-Glu)	74321
18024_3 ScGTR2#13	95	6. Commersonine (Dihydrosolanidine-Gal-Glu-Glu-Glu)	45304
18024_3 ScGTR2#13	145	6. Commersonine (Dihydrosolanidine-Gal-Glu-Glu-Glu)	59609
18024_3 ScGTR2#17	94	6. Commersonine (Dihydrosolanidine-Gal-Glu-Glu-Glu)	5113
18024_3 ScGTR2#17	97	6. Commersonine (Dihydrosolanidine-Gal-Glu-Glu-Glu)	2500
18024_3 ScGTR2#17	85	6. Commersonine (Dihydrosolanidine-Gal-Glu-Glu-Glu)	4235
18024_3 ScGTR2#19	95	6. Commersonine (Dihydrosolanidine-Gal-Glu-Glu-Glu)	4264
18024_3 ScGTR2#19	95	6. Commersonine (Dihydrosolanidine-Gal-Glu-Glu-Glu)	8891
18024_3 ScGTR2#19	95	6. Commersonine (Dihydrosolanidine-Gal-Glu-Glu-Glu)	11527
18024_3 ScGTR2#22	100	6. Commersonine (Dihydrosolanidine-Gal-Glu-Glu-Glu)	49260
18024_3 ScGTR2#22	119	6. Commersonine (Dihydrosolanidine-Gal-Glu-Glu-Glu)	47330
18024_3 ScGTR2#22	111	6. Commersonine (Dihydrosolanidine-Gal-Glu-Glu-Glu)	34322
18024_3 ScGTR2#6	92	6. Commersonine (Dihydrosolanidine-Gal-Glu-Glu-Glu)	73256
18024_3 ScGTR2#6	106	6. Commersonine (Dihydrosolanidine-Gal-Glu-Glu-Glu)	88316
18024_3 ScGTR2#6	107	6. Commersonine (Dihydrosolanidine-Gal-Glu-Glu-Glu)	54846
18024_3 ScGTR2#7	88	6. Commersonine (Dihydrosolanidine-Gal-Glu-Glu-Glu)	67217
18024_3 ScGTR2#7	96	6. Commersonine (Dihydrosolanidine-Gal-Glu-Glu-Glu)	53810
18024_3 ScGTR2#7	102	6. Commersonine (Dihydrosolanidine-Gal-Glu-Glu-Glu)	54202
18024_3 ScGTR2#9	91	6. Commersonine (Dihydrosolanidine-Gal-Glu-Glu-Glu)	41277
18024_3 ScGTR2#9	121	6. Commersonine (Dihydrosolanidine-Gal-Glu-Glu-Glu)	51843
18024_3 ScGTR2#9	114	6. Commersonine (Dihydrosolanidine-Gal-Glu-Glu-Glu)	84614
Atlantic	115	6. Commersonine (Dihydrosolanidine-Gal-Glu-Glu-Glu)	22348
Atlantic	93	6. Commersonine (Dihydrosolanidine-Gal-Glu-Glu-Glu)	2989
Atlantic	106	6. Commersonine (Dihydrosolanidine-Gal-Glu-Glu-Glu)	2500
Atlantic	102	6. Commersonine (Dihydrosolanidine-Gal-Glu-Glu-Glu)	12467
Atlantic	120	6. Commersonine (Dihydrosolanidine-Gal-Glu-Glu-Glu)	2500
CGN18024_1	93	6. Commersonine (Dihydrosolanidine-Gal-Glu-Glu-Glu)	555861
CGN18024_1	120	6. Commersonine (Dihydrosolanidine-Gal-Glu-Glu-Glu)	461335
CGN18024_1	91	6. Commersonine (Dihydrosolanidine-Gal-Glu-Glu-Glu)	572781
CGN18024_3	105	6. Commersonine (Dihydrosolanidine-Gal-Glu-Glu-Glu)	8168
CGN18024_3	104	6. Commersonine (Dihydrosolanidine-Gal-Glu-Glu-Glu)	7718
CGN18024_3	88	6. Commersonine (Dihydrosolanidine-Gal-Glu-Glu-Glu)	4277
18024_3 ScGTR1#1	89	7. Dehydrodemissine (Solanidine-Gal-Glu-Glu-Xyl)	66529
18024_3 ScGTR1#1	80	7. Dehydrodemissine (Solanidine-Gal-Glu-Glu-Xyl)	53299
18024_3 ScGTR1#1	100	7. Dehydrodemissine (Solanidine-Gal-Glu-Glu-Xyl)	55200
18024_3 ScGTR1#2	106	7. Dehydrodemissine (Solanidine-Gal-Glu-Glu-Xyl)	43927
18024_3 ScGTR1#2	101	7. Dehydrodemissine (Solanidine-Gal-Glu-Glu-Xyl)	65367
18024_3 ScGTR1#2	98	7. Dehydrodemissine (Solanidine-Gal-Glu-Glu-Xyl)	70067
18024_3 ScGTR1#3	98	7. Dehydrodemissine (Solanidine-Gal-Glu-Glu-Xyl)	100797
18024_3 ScGTR1#3	84	7. Dehydrodemissine (Solanidine-Gal-Glu-Glu-Xyl)	78048
18024_3 ScGTR1#5	94	7. Dehydrodemissine (Solanidine-Gal-Glu-Glu-Xyl)	53833
18024_3 ScGTR1#5	89	7. Dehydrodemissine (Solanidine-Gal-Glu-Glu-Xyl)	63722
18024_3 ScGTR1#5	105	7. Dehydrodemissine (Solanidine-Gal-Glu-Glu-Xyl)	59937
18024_3 ScGTR1#6	88	7. Dehydrodemissine (Solanidine-Gal-Glu-Glu-Xyl)	115446
18024_3 ScGTR1#6	124	7. Dehydrodemissine (Solanidine-Gal-Glu-Glu-Xyl)	112967
18024_3 ScGTR1#6	94	7. Dehydrodemissine (Solanidine-Gal-Glu-Glu-Xyl)	87960
18024_3 ScGTR1#9	86	7. Dehydrodemissine (Solanidine-Gal-Glu-Glu-Xyl)	56744
18024_3 ScGTR1#9	89	7. Dehydrodemissine (Solanidine-Gal-Glu-Glu-Xyl)	93727
18024_3 ScGTR1#9	98	7. Dehydrodemissine (Solanidine-Gal-Glu-Glu-Xyl)	69426
18024_3 ScGTR2#11	130	7. Dehydrodemissine (Solanidine-Gal-Glu-Glu-Xyl)	2124946
18024_3 ScGTR2#11	96	7. Dehydrodemissine (Solanidine-Gal-Glu-Glu-Xyl)	2174815
18024_3 ScGTR2#13	110	7. Dehydrodemissine (Solanidine-Gal-Glu-Glu-Xyl)	2444918
18024_3 ScGTR2#13	95	7. Dehydrodemissine (Solanidine-Gal-Glu-Glu-Xyl)	2007264
18024_3 ScGTR2#13	145	7. Dehydrodemissine (Solanidine-Gal-Glu-Glu-Xyl)	2357585
18024_3 ScGTR2#17	94	7. Dehydrodemissine (Solanidine-Gal-Glu-Glu-Xyl)	1096823
18024_3 ScGTR2#17	97	7. Dehydrodemissine (Solanidine-Gal-Glu-Glu-Xyl)	1310886
18024_3 ScGTR2#17	85	7. Dehydrodemissine (Solanidine-Gal-Glu-Glu-Xyl)	804148
18024_3 ScGTR2#19	95	7. Dehydrodemissine (Solanidine-Gal-Glu-Glu-Xyl)	1310137
18024_3 ScGTR2#19	95	7. Dehydrodemissine (Solanidine-Gal-Glu-Glu-Xyl)	1474098
18024_3 ScGTR2#19	95	7. Dehydrodemissine (Solanidine-Gal-Glu-Glu-Xyl)	1380323
18024_3 ScGTR2#22	100	7. Dehydrodemissine (Solanidine-Gal-Glu-Glu-Xyl)	1992170
18024_3 ScGTR2#22	119	7. Dehydrodemissine (Solanidine-Gal-Glu-Glu-Xyl)	2122677
18024_3 ScGTR2#22	111	7. Dehydrodemissine (Solanidine-Gal-Glu-Glu-Xyl)	2041145
18024_3 ScGTR2#6	92	7. Dehydrodemissine (Solanidine-Gal-Glu-Glu-Xyl)	2098085
18024_3 ScGTR2#6	106	7. Dehydrodemissine (Solanidine-Gal-Glu-Glu-Xyl)	2119756
18024_3 ScGTR2#6	107	7. Dehydrodemissine (Solanidine-Gal-Glu-Glu-Xyl)	2129877
18024_3 ScGTR2#7	88	7. Dehydrodemissine (Solanidine-Gal-Glu-Glu-Xyl)	2320815
18024_3 ScGTR2#7	96	7. Dehydrodemissine (Solanidine-Gal-Glu-Glu-Xyl)	1934329
18024_3 ScGTR2#7	102	7. Dehydrodemissine (Solanidine-Gal-Glu-Glu-Xyl)	1978428
18024_3 ScGTR2#9	91	7. Dehydrodemissine (Solanidine-Gal-Glu-Glu-Xyl)	1953813
18024_3 ScGTR2#9	121	7. Dehydrodemissine (Solanidine-Gal-Glu-Glu-Xyl)	1709700
18024_3 ScGTR2#9	114	7. Dehydrodemissine (Solanidine-Gal-Glu-Glu-Xyl)	2047208
Atlantic	115	7. Dehydrodemissine (Solanidine-Gal-Glu-Glu-Xyl)	2500
Atlantic	93	7. Dehydrodemissine (Solanidine-Gal-Glu-Glu-Xyl)	2500
Atlantic	106	7. Dehydrodemissine (Solanidine-Gal-Glu-Glu-Xyl)	1500
Atlantic	102	7. Dehydrodemissine (Solanidine-Gal-Glu-Glu-Xyl)	1500
Atlantic	120	7. Dehydrodemissine (Solanidine-Gal-Glu-Glu-Xyl)	2500
CGN18024_1	93	7. Dehydrodemissine (Solanidine-Gal-Glu-Glu-Xyl)	822572
CGN18024_1	120	7. Dehydrodemissine (Solanidine-Gal-Glu-Glu-Xyl)	951226
CGN18024_1	91	7. Dehydrodemissine (Solanidine-Gal-Glu-Glu-Xyl)	664447
CGN18024_3	105	7. Dehydrodemissine (Solanidine-Gal-Glu-Glu-Xyl)	9217
CGN18024_3	104	7. Dehydrodemissine (Solanidine-Gal-Glu-Glu-Xyl)	8955
CGN18024_3	88	7. Dehydrodemissine (Solanidine-Gal-Glu-Glu-Xyl)	6872
18024_3 ScGTR1#1	89	8. Demissine (demissidine-Gal-Glu-Glu-Xyl)	2500
18024_3 ScGTR1#1	80	8. Demissine (demissidine-Gal-Glu-Glu-Xyl)	8677
18024_3 ScGTR1#1	100	8. Demissine (demissidine-Gal-Glu-Glu-Xyl)	2500
18024_3 ScGTR1#2	106	8. Demissine (demissidine-Gal-Glu-Glu-Xyl)	1500
18024_3 ScGTR1#2	101	8. Demissine (demissidine-Gal-Glu-Glu-Xyl)	2500
18024_3 ScGTR1#2	98	8. Demissine (demissidine-Gal-Glu-Glu-Xyl)	7266
18024_3 ScGTR1#3	98	8. Demissine (demissidine-Gal-Glu-Glu-Xyl)	2826
18024_3 ScGTR1#3	84	8. Demissine (demissidine-Gal-Glu-Glu-Xyl)	1500
18024_3 ScGTR1#5	94	8. Demissine (demissidine-Gal-Glu-Glu-Xyl)	2500
18024_3 ScGTR1#5	89	8. Demissine (demissidine-Gal-Glu-Glu-Xyl)	3782
18024_3 ScGTR1#5	105	8. Demissine (demissidine-Gal-Glu-Glu-Xyl)	3391
18024_3 ScGTR1#6	88	8. Demissine (demissidine-Gal-Glu-Glu-Xyl)	8160
18024_3 ScGTR1#6	124	8. Demissine (demissidine-Gal-Glu-Glu-Xyl)	11058
18024_3 ScGTR1#6	94	8. Demissine (demissidine-Gal-Glu-Glu-Xyl)	4506
18024_3 ScGTR1#9	86	8. Demissine (demissidine-Gal-Glu-Glu-Xyl)	9225
18024_3 ScGTR1#9	89	8. Demissine (demissidine-Gal-Glu-Glu-Xyl)	9333
18024_3 ScGTR1#9	98	8. Demissine (demissidine-Gal-Glu-Glu-Xyl)	7229
18024_3 ScGTR2#11	130	8. Demissine (demissidine-Gal-Glu-Glu-Xyl)	892939
18024_3 ScGTR2#11	96	8. Demissine (demissidine-Gal-Glu-Glu-Xyl)	1005292
18024_3 ScGTR2#13	110	8. Demissine (demissidine-Gal-Glu-Glu-Xyl)	846272
18024_3 ScGTR2#13	95	8. Demissine (demissidine-Gal-Glu-Glu-Xyl)	691448
18024_3 ScGTR2#13	145	8. Demissine (demissidine-Gal-Glu-Glu-Xyl)	812015
18024_3 ScGTR2#17	94	8. Demissine (demissidine-Gal-Glu-Glu-Xyl)	493043
18024_3 ScGTR2#17	97	8. Demissine (demissidine-Gal-Glu-Glu-Xyl)	523523
18024_3 ScGTR2#17	85	8. Demissine (demissidine-Gal-Glu-Glu-Xyl)	270030
18024_3 ScGTR2#19	95	8. Demissine (demissidine-Gal-Glu-Glu-Xyl)	806586
18024_3 ScGTR2#19	95	8. Demissine (demissidine-Gal-Glu-Glu-Xyl)	726652
18024_3 ScGTR2#19	95	8. Demissine (demissidine-Gal-Glu-Glu-Xyl)	708771
18024_3 ScGTR2#22	100	8. Demissine (demissidine-Gal-Glu-Glu-Xyl)	838979
18024_3 ScGTR2#22	119	8. Demissine (demissidine-Gal-Glu-Glu-Xyl)	668497
18024_3 ScGTR2#22	111	8. Demissine (demissidine-Gal-Glu-Glu-Xyl)	734855
18024_3 ScGTR2#6	92	8. Demissine (demissidine-Gal-Glu-Glu-Xyl)	689008
18024_3 ScGTR2#6	106	8. Demissine (demissidine-Gal-Glu-Glu-Xyl)	867668
18024_3 ScGTR2#6	107	8. Demissine (demissidine-Gal-Glu-Glu-Xyl)	653300
18024_3 ScGTR2#7	88	8. Demissine (demissidine-Gal-Glu-Glu-Xyl)	855920
18024_3 ScGTR2#7	96	8. Demissine (demissidine-Gal-Glu-Glu-Xyl)	848928
18024_3 ScGTR2#7	102	8. Demissine (demissidine-Gal-Glu-Glu-Xyl)	950004
18024_3 ScGTR2#9	91	8. Demissine (demissidine-Gal-Glu-Glu-Xyl)	725908
18024_3 ScGTR2#9	121	8. Demissine (demissidine-Gal-Glu-Glu-Xyl)	765002
18024_3 ScGTR2#9	114	8. Demissine (demissidine-Gal-Glu-Glu-Xyl)	1048004
Atlantic	115	8. Demissine (demissidine-Gal-Glu-Glu-Xyl)	1500
Atlantic	93	8. Demissine (demissidine-Gal-Glu-Glu-Xyl)	1500
Atlantic	106	8. Demissine (demissidine-Gal-Glu-Glu-Xyl)	2500
Atlantic	102	8. Demissine (demissidine-Gal-Glu-Glu-Xyl)	2500
Atlantic	120	8. Demissine (demissidine-Gal-Glu-Glu-Xyl)	1500
CGN18024_1	93	8. Demissine (demissidine-Gal-Glu-Glu-Xyl)	683982
CGN18024_1	120	8. Demissine (demissidine-Gal-Glu-Glu-Xyl)	515482
CGN18024_1	91	8. Demissine (demissidine-Gal-Glu-Glu-Xyl)	426743
CGN18024_3	105	8. Demissine (demissidine-Gal-Glu-Glu-Xyl)	2500
CGN18024_3	104	8. Demissine (demissidine-Gal-Glu-Glu-Xyl)	2534
CGN18024_3	88	8. Demissine (demissidine-Gal-Glu-Glu-Xyl)	2500
