# Supplementary material for: Tetraose steroidal glycoalkaloids from potato provide resistance against Alternaria solani and Colorado potato beetle
Source: eLife. 2023 Sep 26;12:RP87135. doi: 10.7554/eLife.87135 (PMC10522338; doi:10.7554/eLife.87135)
Supplement: Figure 4—source data 2. [file elife-87135-fig4-data2.xlsx]

## Sheet: Figure 4-source data 2
Genotype	Plant replicate	Leaf position	Lesion size (mm)
CGN18024_1	1	upper	3.78
CGN18024_1	1	upper	3.16
CGN18024_1	1	upper	3.15
CGN18024_1	1	upper	4.02
CGN18024_1	1	upper	4.11
CGN18024_1	1	upper	3.33
CGN18024_1	1	middle	2.49
CGN18024_1	1	middle	3.45
CGN18024_1	1	middle	3.37
CGN18024_1	1	middle	3.43
CGN18024_1	1	middle	3.66
CGN18024_1	1	middle	3.22
CGN18024_1	1	lower	2.91
CGN18024_1	1	lower	3.88
CGN18024_1	1	lower	4.02
CGN18024_1	1	lower	3.83
CGN18024_1	1	lower	4.64
CGN18024_1	1	lower	3.18
CGN18024_3	1	upper	4.65
CGN18024_3	1	upper	6.34
CGN18024_3	1	upper	5.67
CGN18024_3	1	upper	5.7
CGN18024_3	1	upper	4.84
CGN18024_3	1	upper	6.39
CGN18024_3	1	middle	6.39
CGN18024_3	1	middle	5.64
CGN18024_3	1	middle	6.43
CGN18024_3	1	middle	5.98
CGN18024_3	1	middle	4.63
CGN18024_3	1	middle	6.01
CGN18024_3	1	lower	5.84
CGN18024_3	1	lower	5.52
CGN18024_3	1	lower	6.18
CGN18024_3	1	lower	5.75
CGN18024_3	1	lower	6.25
CGN18024_3	1	lower	5
CGN18024_3_ScGTR1#1	1	upper	2.61
CGN18024_3_ScGTR1#1	1	upper	2.77
CGN18024_3_ScGTR1#1	1	upper	1.8
CGN18024_3_ScGTR1#1	1	upper	2.2
CGN18024_3_ScGTR1#1	1	upper	3.14
CGN18024_3_ScGTR1#1	1	upper	5.64
CGN18024_3_ScGTR1#1	1	middle	2.42
CGN18024_3_ScGTR1#1	1	middle	3.49
CGN18024_3_ScGTR1#1	1	middle	2.64
CGN18024_3_ScGTR1#1	1	middle	4.29
CGN18024_3_ScGTR1#1	1	middle	2.14
CGN18024_3_ScGTR1#1	1	middle	3.05
CGN18024_3_ScGTR1#1	1	lower	3
CGN18024_3_ScGTR1#1	1	lower	2.26
CGN18024_3_ScGTR1#1	1	lower	2.44
CGN18024_3_ScGTR1#1	1	lower	3.73
CGN18024_3_ScGTR1#1	1	lower	3.09
CGN18024_3_ScGTR1#1	1	lower	3.17
CGN18024_3_ScGTR1#2	1	upper	NA
CGN18024_3_ScGTR1#2	1	upper	NA
CGN18024_3_ScGTR1#2	1	upper	NA
CGN18024_3_ScGTR1#2	1	upper	NA
CGN18024_3_ScGTR1#2	1	upper	NA
CGN18024_3_ScGTR1#2	1	upper	NA
CGN18024_3_ScGTR1#2	1	middle	NA
CGN18024_3_ScGTR1#2	1	middle	NA
CGN18024_3_ScGTR1#2	1	middle	NA
CGN18024_3_ScGTR1#2	1	middle	NA
CGN18024_3_ScGTR1#2	1	middle	NA
CGN18024_3_ScGTR1#2	1	middle	NA
CGN18024_3_ScGTR1#2	1	lower	3.3
CGN18024_3_ScGTR1#2	1	lower	3.26
CGN18024_3_ScGTR1#2	1	lower	4.04
CGN18024_3_ScGTR1#2	1	lower	3.21
CGN18024_3_ScGTR1#2	1	lower	4.85
CGN18024_3_ScGTR1#2	1	lower	3.08
CGN18024_3_ScGTR1#3	1	upper	4.43
CGN18024_3_ScGTR1#3	1	upper	4.12
CGN18024_3_ScGTR1#3	1	upper	3.89
CGN18024_3_ScGTR1#3	1	upper	NA
CGN18024_3_ScGTR1#3	1	upper	NA
CGN18024_3_ScGTR1#3	1	upper	NA
CGN18024_3_ScGTR1#3	1	middle	2.23
CGN18024_3_ScGTR1#3	1	middle	2.85
CGN18024_3_ScGTR1#3	1	middle	2.46
CGN18024_3_ScGTR1#3	1	middle	2.32
CGN18024_3_ScGTR1#3	1	middle	3.48
CGN18024_3_ScGTR1#3	1	middle	2.67
CGN18024_3_ScGTR1#3	1	lower	2.69
CGN18024_3_ScGTR1#3	1	lower	3.24
CGN18024_3_ScGTR1#3	1	lower	3.95
CGN18024_3_ScGTR1#3	1	lower	3.96
CGN18024_3_ScGTR1#3	1	lower	2.65
CGN18024_3_ScGTR1#3	1	lower	3.01
CGN18024_3_ScGTR2#6	1	upper	NA
CGN18024_3_ScGTR2#6	1	upper	NA
CGN18024_3_ScGTR2#6	1	upper	3.09
CGN18024_3_ScGTR2#6	1	upper	3.67
CGN18024_3_ScGTR2#6	1	upper	3.68
CGN18024_3_ScGTR2#6	1	upper	2.69
CGN18024_3_ScGTR2#6	1	middle	3.56
CGN18024_3_ScGTR2#6	1	middle	4.08
CGN18024_3_ScGTR2#6	1	middle	4.1
CGN18024_3_ScGTR2#6	1	middle	3.97
CGN18024_3_ScGTR2#6	1	middle	3.3
CGN18024_3_ScGTR2#6	1	middle	2.85
CGN18024_3_ScGTR2#6	1	lower	2.99
CGN18024_3_ScGTR2#6	1	lower	2.99
CGN18024_3_ScGTR2#6	1	lower	3.7
CGN18024_3_ScGTR2#6	1	lower	3.43
CGN18024_3_ScGTR2#6	1	lower	2.95
CGN18024_3_ScGTR2#6	1	lower	4.25
CGN18024_3_ScGTR2#7	1	upper	2.93
CGN18024_3_ScGTR2#7	1	upper	3.94
CGN18024_3_ScGTR2#7	1	upper	2.59
CGN18024_3_ScGTR2#7	1	upper	3.27
CGN18024_3_ScGTR2#7	1	upper	3.29
CGN18024_3_ScGTR2#7	1	upper	3.3
CGN18024_3_ScGTR2#7	1	middle	2.23
CGN18024_3_ScGTR2#7	1	middle	3.74
CGN18024_3_ScGTR2#7	1	middle	4.2
CGN18024_3_ScGTR2#7	1	middle	3.81
CGN18024_3_ScGTR2#7	1	middle	3.53
CGN18024_3_ScGTR2#7	1	middle	3.41
CGN18024_3_ScGTR2#7	1	lower	2.41
CGN18024_3_ScGTR2#7	1	lower	2.71
CGN18024_3_ScGTR2#7	1	lower	2.42
CGN18024_3_ScGTR2#7	1	lower	3.18
CGN18024_3_ScGTR2#7	1	lower	5.15
CGN18024_3_ScGTR2#7	1	lower	3.97
CGN18024_3_ScGTR2#9	1	upper	3.1
CGN18024_3_ScGTR2#9	1	upper	3.75
CGN18024_3_ScGTR2#9	1	upper	3.19
CGN18024_3_ScGTR2#9	1	upper	NA
CGN18024_3_ScGTR2#9	1	upper	NA
CGN18024_3_ScGTR2#9	1	upper	NA
CGN18024_3_ScGTR2#9	1	middle	NA
CGN18024_3_ScGTR2#9	1	middle	NA
CGN18024_3_ScGTR2#9	1	middle	NA
CGN18024_3_ScGTR2#9	1	middle	NA
CGN18024_3_ScGTR2#9	1	middle	NA
CGN18024_3_ScGTR2#9	1	middle	NA
CGN18024_3_ScGTR2#9	1	lower	3.57
CGN18024_3_ScGTR2#9	1	lower	4.73
CGN18024_3_ScGTR2#9	1	lower	4.17
CGN18024_3_ScGTR2#9	1	lower	3.1
CGN18024_3_ScGTR2#9	1	lower	3.63
CGN18024_3_ScGTR2#9	1	lower	4.2
CGN18024_1	2	upper	1.69
CGN18024_1	2	upper	2.54
CGN18024_1	2	upper	2.37
CGN18024_1	2	upper	2.92
CGN18024_1	2	upper	2.99
CGN18024_1	2	upper	3.59
CGN18024_1	2	middle	3.08
CGN18024_1	2	middle	2.75
CGN18024_1	2	middle	5.04
CGN18024_1	2	middle	2.35
CGN18024_1	2	middle	4.19
CGN18024_1	2	middle	7.09
CGN18024_1	2	lower	2.49
CGN18024_1	2	lower	3.38
CGN18024_1	2	lower	3.95
CGN18024_1	2	lower	4.07
CGN18024_1	2	lower	4.88
CGN18024_1	2	lower	3.18
CGN18024_3	2	upper	NA
CGN18024_3	2	upper	NA
CGN18024_3	2	upper	NA
CGN18024_3	2	upper	NA
CGN18024_3	2	upper	NA
CGN18024_3	2	upper	NA
CGN18024_3	2	middle	NA
CGN18024_3	2	middle	NA
CGN18024_3	2	middle	NA
CGN18024_3	2	middle	NA
CGN18024_3	2	middle	NA
CGN18024_3	2	middle	NA
CGN18024_3	2	lower	NA
CGN18024_3	2	lower	NA
CGN18024_3	2	lower	NA
CGN18024_3	2	lower	NA
CGN18024_3	2	lower	NA
CGN18024_3	2	lower	NA
CGN18024_3_ScGTR1#1	2	upper	NA
CGN18024_3_ScGTR1#1	2	upper	NA
CGN18024_3_ScGTR1#1	2	upper	NA
CGN18024_3_ScGTR1#1	2	upper	NA
CGN18024_3_ScGTR1#1	2	upper	NA
CGN18024_3_ScGTR1#1	2	upper	NA
CGN18024_3_ScGTR1#1	2	middle	NA
CGN18024_3_ScGTR1#1	2	middle	NA
CGN18024_3_ScGTR1#1	2	middle	NA
CGN18024_3_ScGTR1#1	2	middle	NA
CGN18024_3_ScGTR1#1	2	middle	NA
CGN18024_3_ScGTR1#1	2	middle	NA
CGN18024_3_ScGTR1#1	2	lower	NA
CGN18024_3_ScGTR1#1	2	lower	NA
CGN18024_3_ScGTR1#1	2	lower	NA
CGN18024_3_ScGTR1#1	2	lower	NA
CGN18024_3_ScGTR1#1	2	lower	NA
CGN18024_3_ScGTR1#1	2	lower	NA
CGN18024_3_ScGTR1#2	2	upper	2.77
CGN18024_3_ScGTR1#2	2	upper	4.1
CGN18024_3_ScGTR1#2	2	upper	3.2
CGN18024_3_ScGTR1#2	2	upper	3.45
CGN18024_3_ScGTR1#2	2	upper	3.38
CGN18024_3_ScGTR1#2	2	upper	2.99
CGN18024_3_ScGTR1#2	2	middle	3.86
CGN18024_3_ScGTR1#2	2	middle	3.55
CGN18024_3_ScGTR1#2	2	middle	3.73
CGN18024_3_ScGTR1#2	2	middle	3.59
CGN18024_3_ScGTR1#2	2	middle	3.63
CGN18024_3_ScGTR1#2	2	middle	3.63
CGN18024_3_ScGTR1#2	2	lower	NA
CGN18024_3_ScGTR1#2	2	lower	NA
CGN18024_3_ScGTR1#2	2	lower	NA
CGN18024_3_ScGTR1#2	2	lower	NA
CGN18024_3_ScGTR1#2	2	lower	NA
CGN18024_3_ScGTR1#2	2	lower	NA
CGN18024_3_ScGTR1#3	2	upper	2.92
CGN18024_3_ScGTR1#3	2	upper	3.43
CGN18024_3_ScGTR1#3	2	upper	3.45
CGN18024_3_ScGTR1#3	2	upper	2.81
CGN18024_3_ScGTR1#3	2	upper	3.49
CGN18024_3_ScGTR1#3	2	upper	3.22
CGN18024_3_ScGTR1#3	2	middle	3.3
CGN18024_3_ScGTR1#3	2	middle	3.48
CGN18024_3_ScGTR1#3	2	middle	3.54
CGN18024_3_ScGTR1#3	2	middle	2.69
CGN18024_3_ScGTR1#3	2	middle	3.45
CGN18024_3_ScGTR1#3	2	middle	2.61
CGN18024_3_ScGTR1#3	2	lower	NA
CGN18024_3_ScGTR1#3	2	lower	NA
CGN18024_3_ScGTR1#3	2	lower	NA
CGN18024_3_ScGTR1#3	2	lower	NA
CGN18024_3_ScGTR1#3	2	lower	NA
CGN18024_3_ScGTR1#3	2	lower	NA
CGN18024_3_ScGTR2#6	2	upper	2.67
CGN18024_3_ScGTR2#6	2	upper	3.01
CGN18024_3_ScGTR2#6	2	upper	3.67
CGN18024_3_ScGTR2#6	2	upper	3.52
CGN18024_3_ScGTR2#6	2	upper	2.34
CGN18024_3_ScGTR2#6	2	upper	3.9
CGN18024_3_ScGTR2#6	2	middle	2.28
CGN18024_3_ScGTR2#6	2	middle	2.25
CGN18024_3_ScGTR2#6	2	middle	3.21
CGN18024_3_ScGTR2#6	2	middle	1.81
CGN18024_3_ScGTR2#6	2	middle	3.32
CGN18024_3_ScGTR2#6	2	middle	3.54
CGN18024_3_ScGTR2#6	2	lower	3.46
CGN18024_3_ScGTR2#6	2	lower	3.89
CGN18024_3_ScGTR2#6	2	lower	4.98
CGN18024_3_ScGTR2#6	2	lower	4.15
CGN18024_3_ScGTR2#6	2	lower	3.85
CGN18024_3_ScGTR2#6	2	lower	5.19
CGN18024_3_ScGTR2#7	2	upper	3.68
CGN18024_3_ScGTR2#7	2	upper	3.59
CGN18024_3_ScGTR2#7	2	upper	3.53
CGN18024_3_ScGTR2#7	2	upper	3.48
CGN18024_3_ScGTR2#7	2	upper	NA
CGN18024_3_ScGTR2#7	2	upper	NA
CGN18024_3_ScGTR2#7	2	middle	3.24
CGN18024_3_ScGTR2#7	2	middle	3.28
CGN18024_3_ScGTR2#7	2	middle	3.47
CGN18024_3_ScGTR2#7	2	middle	3.88
CGN18024_3_ScGTR2#7	2	middle	3.94
CGN18024_3_ScGTR2#7	2	middle	4.71
CGN18024_3_ScGTR2#7	2	lower	3.99
CGN18024_3_ScGTR2#7	2	lower	4.17
CGN18024_3_ScGTR2#7	2	lower	4.73
CGN18024_3_ScGTR2#7	2	lower	3.24
CGN18024_3_ScGTR2#7	2	lower	3.81
CGN18024_3_ScGTR2#7	2	lower	3.68
CGN18024_3_ScGTR2#9	2	upper	4.18
CGN18024_3_ScGTR2#9	2	upper	3.91
CGN18024_3_ScGTR2#9	2	upper	3.77
CGN18024_3_ScGTR2#9	2	upper	4.38
CGN18024_3_ScGTR2#9	2	upper	2.17
CGN18024_3_ScGTR2#9	2	upper	3.86
CGN18024_3_ScGTR2#9	2	middle	3.24
CGN18024_3_ScGTR2#9	2	middle	3.62
CGN18024_3_ScGTR2#9	2	middle	2.65
CGN18024_3_ScGTR2#9	2	middle	3.06
CGN18024_3_ScGTR2#9	2	middle	3.4
CGN18024_3_ScGTR2#9	2	middle	3.28
CGN18024_3_ScGTR2#9	2	lower	2.92
CGN18024_3_ScGTR2#9	2	lower	3.39
CGN18024_3_ScGTR2#9	2	lower	3.63
CGN18024_3_ScGTR2#9	2	lower	NA
CGN18024_3_ScGTR2#9	2	lower	NA
CGN18024_3_ScGTR2#9	2	lower	3.18
CGN18024_1	3	upper	3.41
CGN18024_1	3	upper	3.35
CGN18024_1	3	upper	3.32
CGN18024_1	3	upper	3.46
CGN18024_1	3	upper	3.1
CGN18024_1	3	upper	2.31
CGN18024_1	3	middle	2.9
CGN18024_1	3	middle	2.89
CGN18024_1	3	middle	2.64
CGN18024_1	3	middle	3.6
CGN18024_1	3	middle	3.89
CGN18024_1	3	middle	4.32
CGN18024_1	3	lower	NA
CGN18024_1	3	lower	NA
CGN18024_1	3	lower	NA
CGN18024_1	3	lower	NA
CGN18024_1	3	lower	NA
CGN18024_1	3	lower	NA
CGN18024_3	3	upper	5.63
CGN18024_3	3	upper	2.45
CGN18024_3	3	upper	4.98
CGN18024_3	3	upper	5.21
CGN18024_3	3	upper	4.85
CGN18024_3	3	upper	5.78
CGN18024_3	3	middle	NA
CGN18024_3	3	middle	NA
CGN18024_3	3	middle	NA
CGN18024_3	3	middle	NA
CGN18024_3	3	middle	NA
CGN18024_3	3	middle	NA
CGN18024_3	3	lower	6.86
CGN18024_3	3	lower	7.11
CGN18024_3	3	lower	8.03
CGN18024_3	3	lower	6.63
CGN18024_3	3	lower	5.93
CGN18024_3	3	lower	7.43
CGN18024_3_ScGTR1#1	3	upper	2.88
CGN18024_3_ScGTR1#1	3	upper	2.88
CGN18024_3_ScGTR1#1	3	upper	4.95
CGN18024_3_ScGTR1#1	3	upper	3.55
CGN18024_3_ScGTR1#1	3	upper	4.17
CGN18024_3_ScGTR1#1	3	upper	4.34
CGN18024_3_ScGTR1#1	3	middle	3.06
CGN18024_3_ScGTR1#1	3	middle	2.64
CGN18024_3_ScGTR1#1	3	middle	2.12
CGN18024_3_ScGTR1#1	3	middle	4.13
CGN18024_3_ScGTR1#1	3	middle	3.04
CGN18024_3_ScGTR1#1	3	middle	2.21
CGN18024_3_ScGTR1#1	3	lower	NA
CGN18024_3_ScGTR1#1	3	lower	NA
CGN18024_3_ScGTR1#1	3	lower	NA
CGN18024_3_ScGTR1#1	3	lower	NA
CGN18024_3_ScGTR1#1	3	lower	NA
CGN18024_3_ScGTR1#1	3	lower	NA
CGN18024_3_ScGTR1#2	3	upper	2.87
CGN18024_3_ScGTR1#2	3	upper	3.92
CGN18024_3_ScGTR1#2	3	upper	2.84
CGN18024_3_ScGTR1#2	3	upper	2.95
CGN18024_3_ScGTR1#2	3	upper	3.08
CGN18024_3_ScGTR1#2	3	upper	4.24
CGN18024_3_ScGTR1#2	3	middle	2.86
CGN18024_3_ScGTR1#2	3	middle	3.24
CGN18024_3_ScGTR1#2	3	middle	3.37
CGN18024_3_ScGTR1#2	3	middle	2.99
CGN18024_3_ScGTR1#2	3	middle	2.44
CGN18024_3_ScGTR1#2	3	middle	3.51
CGN18024_3_ScGTR1#2	3	lower	2.87
CGN18024_3_ScGTR1#2	3	lower	3.26
CGN18024_3_ScGTR1#2	3	lower	3.61
CGN18024_3_ScGTR1#2	3	lower	3.89
CGN18024_3_ScGTR1#2	3	lower	3.18
CGN18024_3_ScGTR1#2	3	lower	2.7
CGN18024_3_ScGTR1#3	3	upper	3.15
CGN18024_3_ScGTR1#3	3	upper	3.5
CGN18024_3_ScGTR1#3	3	upper	3.43
CGN18024_3_ScGTR1#3	3	upper	3.39
CGN18024_3_ScGTR1#3	3	upper	3.93
CGN18024_3_ScGTR1#3	3	upper	2.09
CGN18024_3_ScGTR1#3	3	middle	3.22
CGN18024_3_ScGTR1#3	3	middle	3.5
CGN18024_3_ScGTR1#3	3	middle	2.66
CGN18024_3_ScGTR1#3	3	middle	3.43
CGN18024_3_ScGTR1#3	3	middle	2.99
CGN18024_3_ScGTR1#3	3	middle	3.73
CGN18024_3_ScGTR1#3	3	lower	NA
CGN18024_3_ScGTR1#3	3	lower	NA
CGN18024_3_ScGTR1#3	3	lower	NA
CGN18024_3_ScGTR1#3	3	lower	NA
CGN18024_3_ScGTR1#3	3	lower	NA
CGN18024_3_ScGTR1#3	3	lower	NA
CGN18024_3_ScGTR2#6	3	upper	2.14
CGN18024_3_ScGTR2#6	3	upper	3.44
CGN18024_3_ScGTR2#6	3	upper	2.87
CGN18024_3_ScGTR2#6	3	upper	NA
CGN18024_3_ScGTR2#6	3	upper	NA
CGN18024_3_ScGTR2#6	3	upper	NA
CGN18024_3_ScGTR2#6	3	middle	2.41
CGN18024_3_ScGTR2#6	3	middle	3.92
CGN18024_3_ScGTR2#6	3	middle	4.17
CGN18024_3_ScGTR2#6	3	middle	NA
CGN18024_3_ScGTR2#6	3	middle	NA
CGN18024_3_ScGTR2#6	3	middle	NA
CGN18024_3_ScGTR2#6	3	lower	2.98
CGN18024_3_ScGTR2#6	3	lower	NA
CGN18024_3_ScGTR2#6	3	lower	NA
CGN18024_3_ScGTR2#6	3	lower	NA
CGN18024_3_ScGTR2#6	3	lower	NA
CGN18024_3_ScGTR2#6	3	lower	NA
CGN18024_3_ScGTR2#7	3	upper	3.07
CGN18024_3_ScGTR2#7	3	upper	2.5
CGN18024_3_ScGTR2#7	3	upper	2.36
CGN18024_3_ScGTR2#7	3	upper	NA
CGN18024_3_ScGTR2#7	3	upper	NA
CGN18024_3_ScGTR2#7	3	upper	NA
CGN18024_3_ScGTR2#7	3	middle	3.44
CGN18024_3_ScGTR2#7	3	middle	3.84
CGN18024_3_ScGTR2#7	3	middle	4.51
CGN18024_3_ScGTR2#7	3	middle	3.85
CGN18024_3_ScGTR2#7	3	middle	4.08
CGN18024_3_ScGTR2#7	3	middle	3.35
CGN18024_3_ScGTR2#7	3	lower	NA
CGN18024_3_ScGTR2#7	3	lower	NA
CGN18024_3_ScGTR2#7	3	lower	NA
CGN18024_3_ScGTR2#7	3	lower	NA
CGN18024_3_ScGTR2#7	3	lower	NA
CGN18024_3_ScGTR2#7	3	lower	NA
CGN18024_3_ScGTR2#9	3	upper	4.07
CGN18024_3_ScGTR2#9	3	upper	3
CGN18024_3_ScGTR2#9	3	upper	3.68
CGN18024_3_ScGTR2#9	3	upper	4.23
CGN18024_3_ScGTR2#9	3	upper	3.31
CGN18024_3_ScGTR2#9	3	upper	5.16
CGN18024_3_ScGTR2#9	3	middle	2.72
CGN18024_3_ScGTR2#9	3	middle	3.11
CGN18024_3_ScGTR2#9	3	middle	3.38
CGN18024_3_ScGTR2#9	3	middle	3.54
CGN18024_3_ScGTR2#9	3	middle	3.5
CGN18024_3_ScGTR2#9	3	middle	2.43
CGN18024_3_ScGTR2#9	3	lower	3.79
CGN18024_3_ScGTR2#9	3	lower	3.91
CGN18024_3_ScGTR2#9	3	lower	3.78
CGN18024_3_ScGTR2#9	3	lower	3.19
CGN18024_3_ScGTR2#9	3	lower	3.42
CGN18024_3_ScGTR2#9	3	lower	3.23
