# Supplementary material for: Tetraose steroidal glycoalkaloids from potato provide resistance against Alternaria solani and Colorado potato beetle
Source: eLife. 2023 Sep 26;12:RP87135. doi: 10.7554/eLife.87135 (PMC10522338; doi:10.7554/eLife.87135)
Supplement: Supplementary file 5. [file elife-87135-supp5.xlsx]

## Sheet: S5_TableHRM
Primer	Sequence	Reference	SNP location
AJW12A1f	TTTAAAAGGGGAAAGCAAGG	DMv4.04	ch12:2353885
AJW12A1r	GCTTCAGGGAAATGAGACAGT	DMv4.04	ch12:2353885
AJW12A2f	AACTGCTTCCACAACTGCTG	DMv4.04	ch12:2364869
AJW12A2r	CTGGGATGATTCACCTAAGGA	DMv4.04	ch12:2364869
AJW12A3f	CCATTGGCAGAAGAATCACA	DMv4.04	ch12:6675425
AJW12A3r	CGAATGTGGAAGGTGAAGG	DMv4.04	ch12:6675425
AJW12A4f	TTGTGAAGCCGATGAAGATT	DMv4.04	ch12:6910330
AJW12A4r	GGAATGCTAGCTGCCATACAT	DMv4.04	ch12:6910330
AJW12A5f	AAGTTCCCAACGTATTTCCAG	DMv4.04	ch12:21327553
AJW12A5r	TCAAGTCGAGACATTGAGAAGG	DMv4.04	ch12:21327553
AJW12A6f	CCTGAACAGAGATTGCTTCAA	DMv4.04	ch12:22135676
AJW12A6r	GTACCTCCTCGCACGACTG	DMv4.04	ch12:22135676
AJW12A7f	TTAGTTGGCCAAGCAACAAC	DMv4.04	ch12:43307989
AJW12A7r	TTCCATGGACTCTCCTCACA	DMv4.04	ch12:43307989
AJW12A8f	TGTTGTTTGTTCCATGATAGGC	DMv4.04	ch12:45976484
AJW12A8r	TCTCTTCAGTTGTCGGTTGAA	DMv4.04	ch12:45976484
AJW12A10f	TGCTCCTGAGGTATTTGCAC	DMv4.04	ch12:55861290
AJW12A10r	CATGGTGCTAGCTGCATTCT	DMv4.04	ch12:55861290
AJW12B1f	AAGAAGGCTCAGGCAGATGT	DMv4.04	ch12:631415
AJW12B1r	AGCGAGGAATTGGAGACACT	DMv4.04	ch12:631415
AJW12B2f	TTGCTTGGTTCGATGTCTATG	DMv4.04	ch12:1075956
AJW12B2r	GCTGCATTAACATCCACTTGA	DMv4.04	ch12:1075956
AJW12B3f	CATGAGCCATGAATTTGGAG	DMv4.04	ch12:3022721
AJW12B3r	ATCAGTAGTGGTGGCAGTGG	DMv4.04	ch12:3022721
AJW12B4f	TCCCATATCTTGCCAATACAAC	DMv4.04	ch12:4008171
AJW12B4r	AAATTACGGGCGTGTAGAGG	DMv4.04	ch12:4008171
AJW12E2f	GTTTCTCAGCAACAGGCAAA	Solyntus	ch12_RaGOO:2335565
AJW12E2r	TGTCTCTGGTATGGAGCCTGT	Solyntus	ch12_RaGOO:2335565
AJW12E3f	GACCCTCTGGCAAGCAAAT	Solyntus	ch12_RaGOO:2377451
AJW12E3r	TCATCATCGTTCATGGCATT	Solyntus	ch12_RaGOO:2377451
AJW12_764Kf	AAACAAACTAAAAAGGAAACTAGGACA	CGN18024_1
AJW12_764Kr	TTCAAACATGTTCATTTCTTGCT	CGN18024_1
AJW12_797Kf	CTGGAGGGTTCGGAATTTTA	CGN18024_1
AJW12_797Kr	ACTGTAGCGGAAGGAGGTTC	CGN18024_1
AJW12_807Kf	TCTTCTTTGGTTGGTCCTAAGC	CGN18024_1
AJW12_807Kr	CATCGCGACCAGCTTTATCT	CGN18024_1
AJW12_817Kf	GACATCATGTAATGACGGAGGA	CGN18024_1
AJW12_817Kr	CGATATACTTCACCTCAAAATTACAAC	CGN18024_1
