# Supplementary material for: Tetraose steroidal glycoalkaloids from potato provide resistance against Alternaria solani and Colorado potato beetle
Source: eLife. 2023 Sep 26;12:RP87135. doi: 10.7554/eLife.87135 (PMC10522338; doi:10.7554/eLife.87135)
Supplement: Supplementary file 6. [file elife-87135-supp6.xlsx]

## Sheet: S6_TableCloning
Primer	Sequence
caccScGTF_R1f	caccATGGCTGCTATGAATGAAGTGA
ScGTF_R1r	TTATTCAATAATATGTGATATGAAAGATTCC
caccScGTF_R2f	caccATGGCTGCTATCAATGAAATGA
ScGTF_R2r	TTATTCAATAATATGTGATATGAAAGATTCC
caccScGTF_S1f	caccATGGCTACCAATTCATCAACC
ScGTF_S1r	TTATTTGGTAATACAAGAAATGAAAGATTC
caccScGTF_S2f	caccATGTCTGCTATCAATGAAATGATTG
ScGTF_S2r	TTATTCAATAATATGTGATATGAAAGATTCC
