# Supplementary material for: Tetraose steroidal glycoalkaloids from potato provide resistance against Alternaria solani and Colorado potato beetle
Source: eLife. 2023 Sep 26;12:RP87135. doi: 10.7554/eLife.87135 (PMC10522338; doi:10.7554/eLife.87135)
Supplement: Supplementary file 7. [file elife-87135-supp7.xlsx]

## Sheet: S7_TableTransformants
primer	sequence	comment
p35Sef	cgcacaatcccactatcctt	forward primer on 35S promoter
ScGTR1sr3	GTTTGAGGCCCCTTGGAG	reverse primer on ScGTR1
ScGTR2sr3	ACCCCGAGACTACCTTGG	reverse primer on ScGTR2
ef1αF1	ATTGGAAACGGATATGCTCCA	forward primer on ef1αF1 control
ef1αR1	TCCTTACCTGAACGCCTGTCA	reverse primer on ef1αF1 control
